# Supplementary material for: A short designed semi-aromatic organic nanotube – synthesis, chiroptical characterization, and host properties
Source: Royal Society of Chemistry journal article supplement (doi:10.1039/c4ob01683a), 2014-10-01
Supplement: c4ob01683a1.pdf [file c4ob01683a1.pdf]

## Supporting Information

### **A Short Designed Semi-Aromatic Organic Nanotube - synthesis, chiroptical characterization, and host properties**

Torbjörn Wixe<sup>a</sup>, Niels Johan Christensen<sup>b</sup>, Sven Lidin<sup>a</sup>, Peter Fristrup<sup>b</sup>  
and Kenneth Wärnmark<sup>a\*</sup>

#### **Table of Contents**

S1 <sup>1</sup>H and <sup>13</sup>C NMR spectra of:

|        |                                                                                     |         |
|--------|-------------------------------------------------------------------------------------|---------|
| S1.1   | Compound 7 .....                                                                    | S3-S5   |
| S1.2   | Compound 8 .....                                                                    | S6-S7   |
| S1.3   | Compound 9 .....                                                                    | S8-S9   |
| S1.4   | Compound 10 .....                                                                   | S10-S12 |
| S1.5   | Compound 12 .....                                                                   | S13-S14 |
| S1.6   | Compound 13 .....                                                                   | S15-S16 |
| S1.7   | Compound 14 .....                                                                   | S17-S18 |
| S1.8   | Compound 15 .....                                                                   | S19-S20 |
| S1.9   | Compound 16 .....                                                                   | S21-S22 |
| S1.10  | Compound 2 ( <sup>19</sup> F NMR) .....                                             | S23     |
| S1.11  | Compound 2 .....                                                                    | S24-S27 |
| S2     | NMR Titrations .....                                                                | S28-S31 |
| S3     | Molecular Dynamics Simulations .....                                                | S32     |
| S3.1   | Host-Guest Interactions .....                                                       | S32     |
| S3.1.1 | Initial Structures of Heptamer 2 - Guanidinium Complexes .....                      | S32     |
| S3.1.2 | Heptamer 2 - Acetylcholine Interatomic Distances in MD Simulations .....            | S33     |
| S3.1.3 | Heptamer 2 - Guanidinium Interatomic Distances in MD Simulations .....              | S34     |
| S3.1.4 | Snapshots from Heptamer 2 - Guanidinium Simulations .....                           | S35     |
| S3.1.5 | MD Snapshot of Heptamer 2 - Guanidinium Bridging Interaction .....                  | S38     |
| S3.2   | MD Simulations of the Free Heptamer 2 .....                                         | S39     |
| S3.2.1 | Heptamer 2 MD Snapshots from 300 K and 400 K Simulations .....                      | S39     |
| S4     | Heptamer 2 Molecular Models .....                                                   | S40     |
| S4.1   | Heptamer 2 Molecular Models and Comparison with the Crystal Structure of<br>14 S40  |         |
| S5     | Calculated Heptamer ECD/UV Spectra .....                                            | S41     |
| S5.1   | ECD/UV Spectra for Different Heptamer Models at Different Levels of<br>Theory ..... | S42     |

|      |                                                            |     |
|------|------------------------------------------------------------|-----|
| S5.2 | Heptamer ECD Spectra at Different Bandwidths .....         | S43 |
| S6   | Coordinates for Optimized Structures .....                 | S44 |
| S6.1 | B3LYP/6-31G(d) Optimized Geometry of Heptamer 2.....       | S44 |
| S6.2 | OPLS_2005 Optimized Geometry of Heptamer 2 .....           | S48 |
| S6.3 | B3LYP-D3/6-31G(d,p) Optimized Geometry of Heptamer 2 ..... | S52 |
| S7   | Crystallographic details of compound 14.....               | S57 |
| S8   | REFERENCES .....                                           | S58 |

NAME TW938a  
 EXPNO 1  
 PROCNO 1  
 Date\_ 20121002  
 Time 15.03  
 INSTRUM spect  
 PROBHD 5 mm PABBO BB/  
 PULPROG zg30  
 TD 57690  
 SOLVENT CDCl3  
 NS 32  
 DS 2  
 SWH 7211.539 Hz  
 FIDRES 0.125005 Hz  
 AQ 3.9998901 sec  
 RG 161  
 DW 69.333 usec  
 DE 6.00 usec  
 TE 294.5 K  
 D1 0.00100000 sec  
 TD0 1

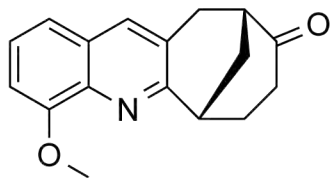

Compound 7

===== CHANNEL f1 =====

NUC1 1H  
 P1 10.00 usec  
 PL1 -4.00 dB  
 PL1W 21.45254898 W  
 SFO1 400.1334011 MHz  
 SI 131072  
 SF 400.1300067 MHz  
 WDW EM  
 SSB 0  
 LB 0.30 Hz  
 GB 0  
 PC 4.00

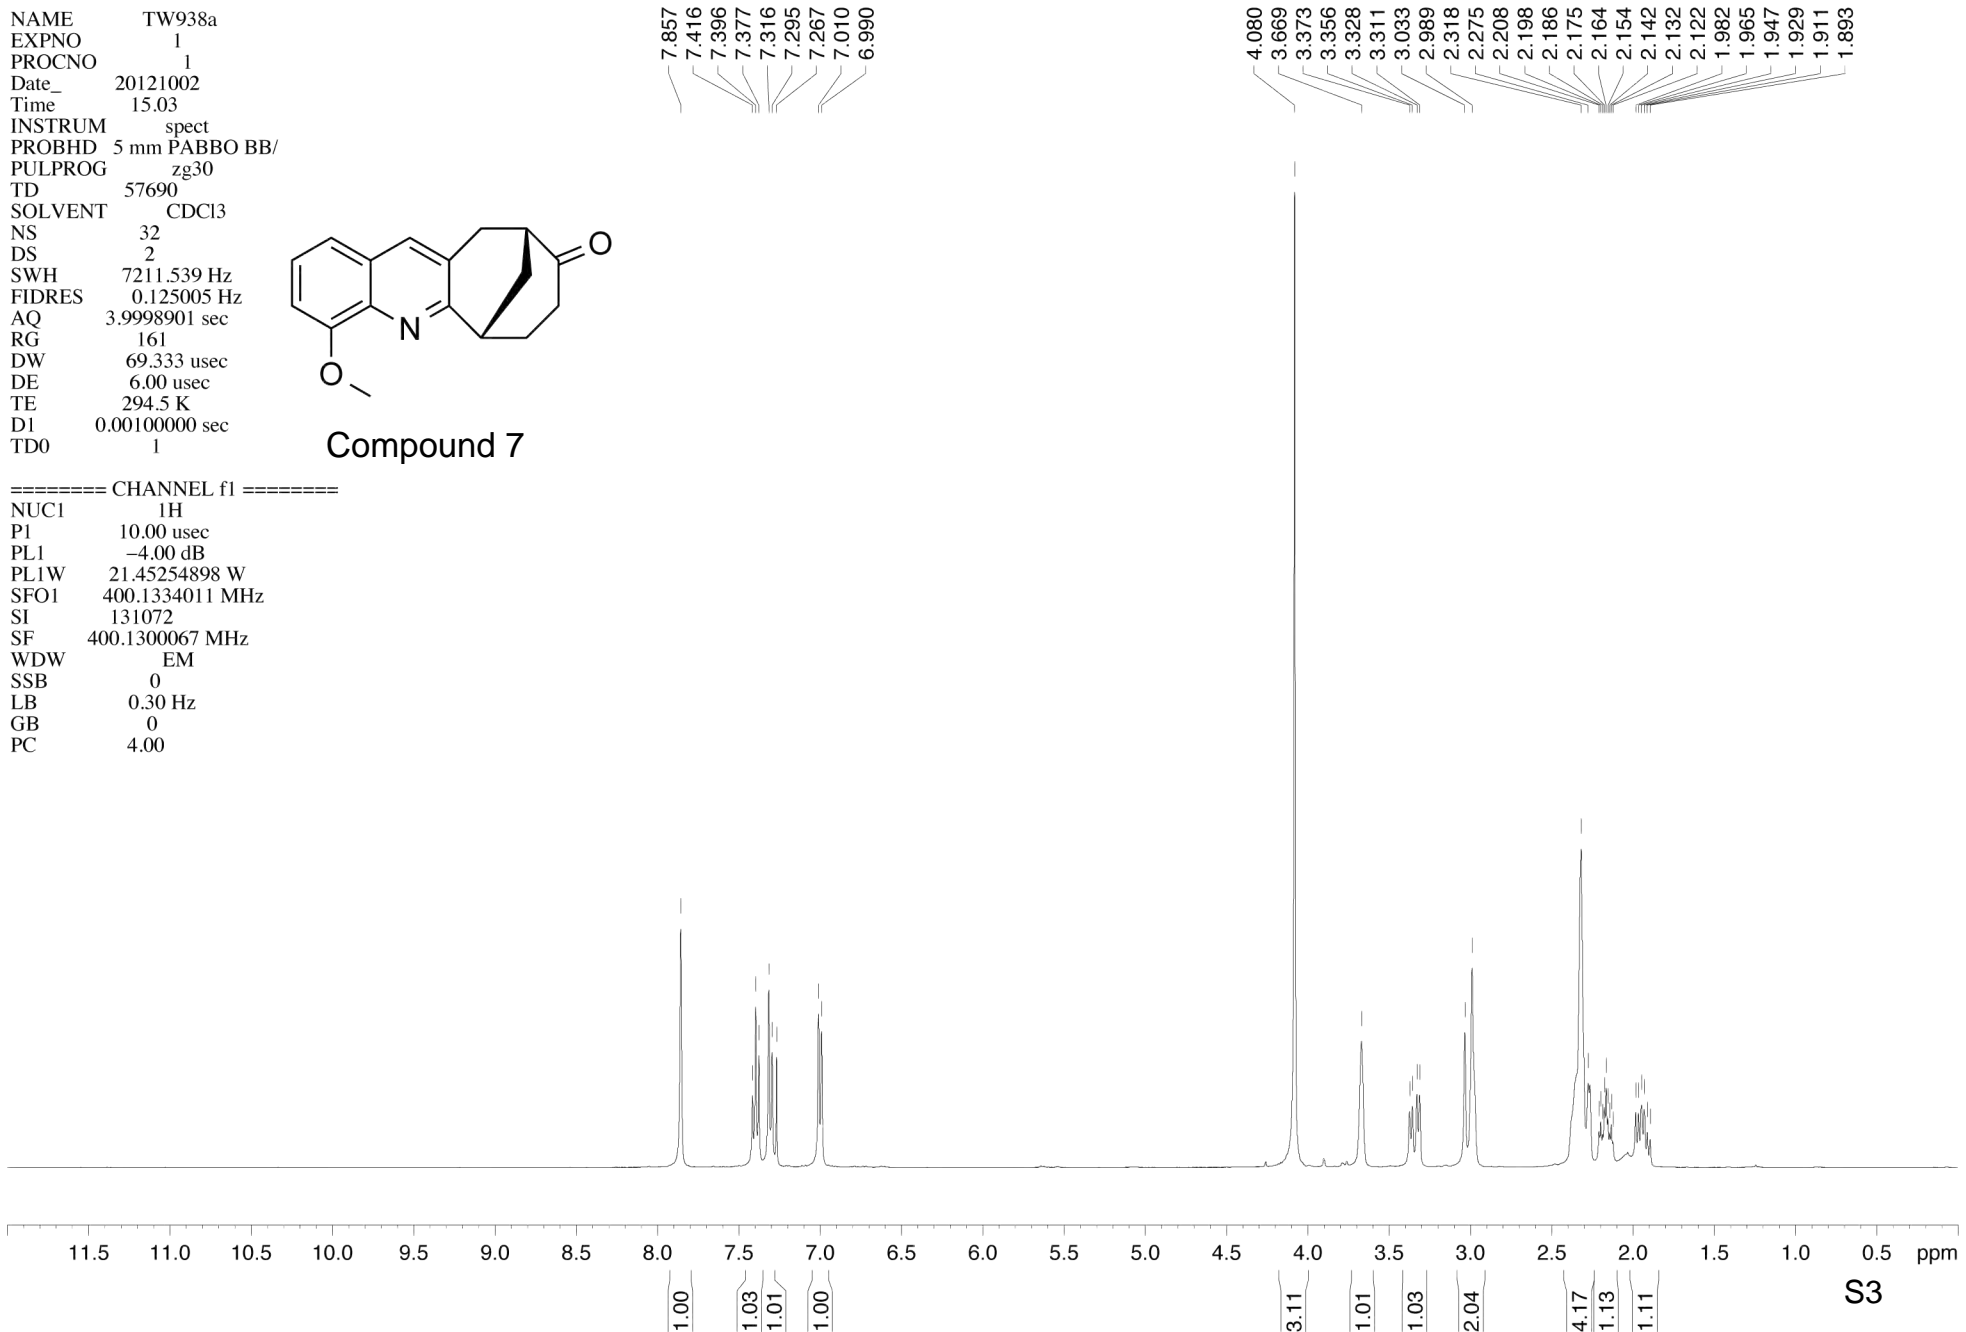

NAME TW938a  
 EXPNO 2  
 PROCNO 1  
 Date\_ 20121002  
 Time 21.15  
 INSTRUM spect  
 PROBHD 5 mm PABBO BB/  
 PULPROG zgdc30  
 TD 48074  
 SOLVENT CDC13  
 NS 4000  
 DS 4  
 SWH 24038.461 Hz  
 FIDRES 0.500030 Hz  
 AQ 0.9999892 sec  
 RG 57  
 DW 20.800 usec  
 DE 6.00 usec  
 TE 295.9 K  
 D1 0.00100000 sec  
 D11 0.03000000 sec  
 TD0 1

213.675

159.094  
155.065

139.179  
135.293  
128.819  
128.724  
126.370  
119.060

107.280

77.479  
77.161  
76.843

56.190

44.657  
36.769  
36.481  
34.126  
31.809  
31.523

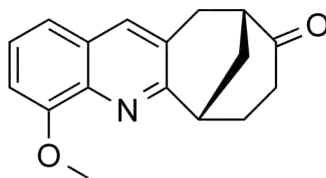

Compound 7

===== CHANNEL f1 =====

NUC1 13C  
 P1 8.50 usec  
 PL1 -3.00 dB  
 PL1W 58.63890457 W  
 SFO1 100.6228298 MHz

===== CHANNEL f2 =====

CPDPRG2 waltz16  
 NUC2 1H  
 PCPD2 80.00 usec  
 PL2 -4.00 dB  
 PL12 14.06 dB  
 PL2W 21.45254898 W  
 PL12W 0.33533499 W  
 SFO2 400.1316005 MHz  
 SI 32768  
 SF 100.6127612 MHz

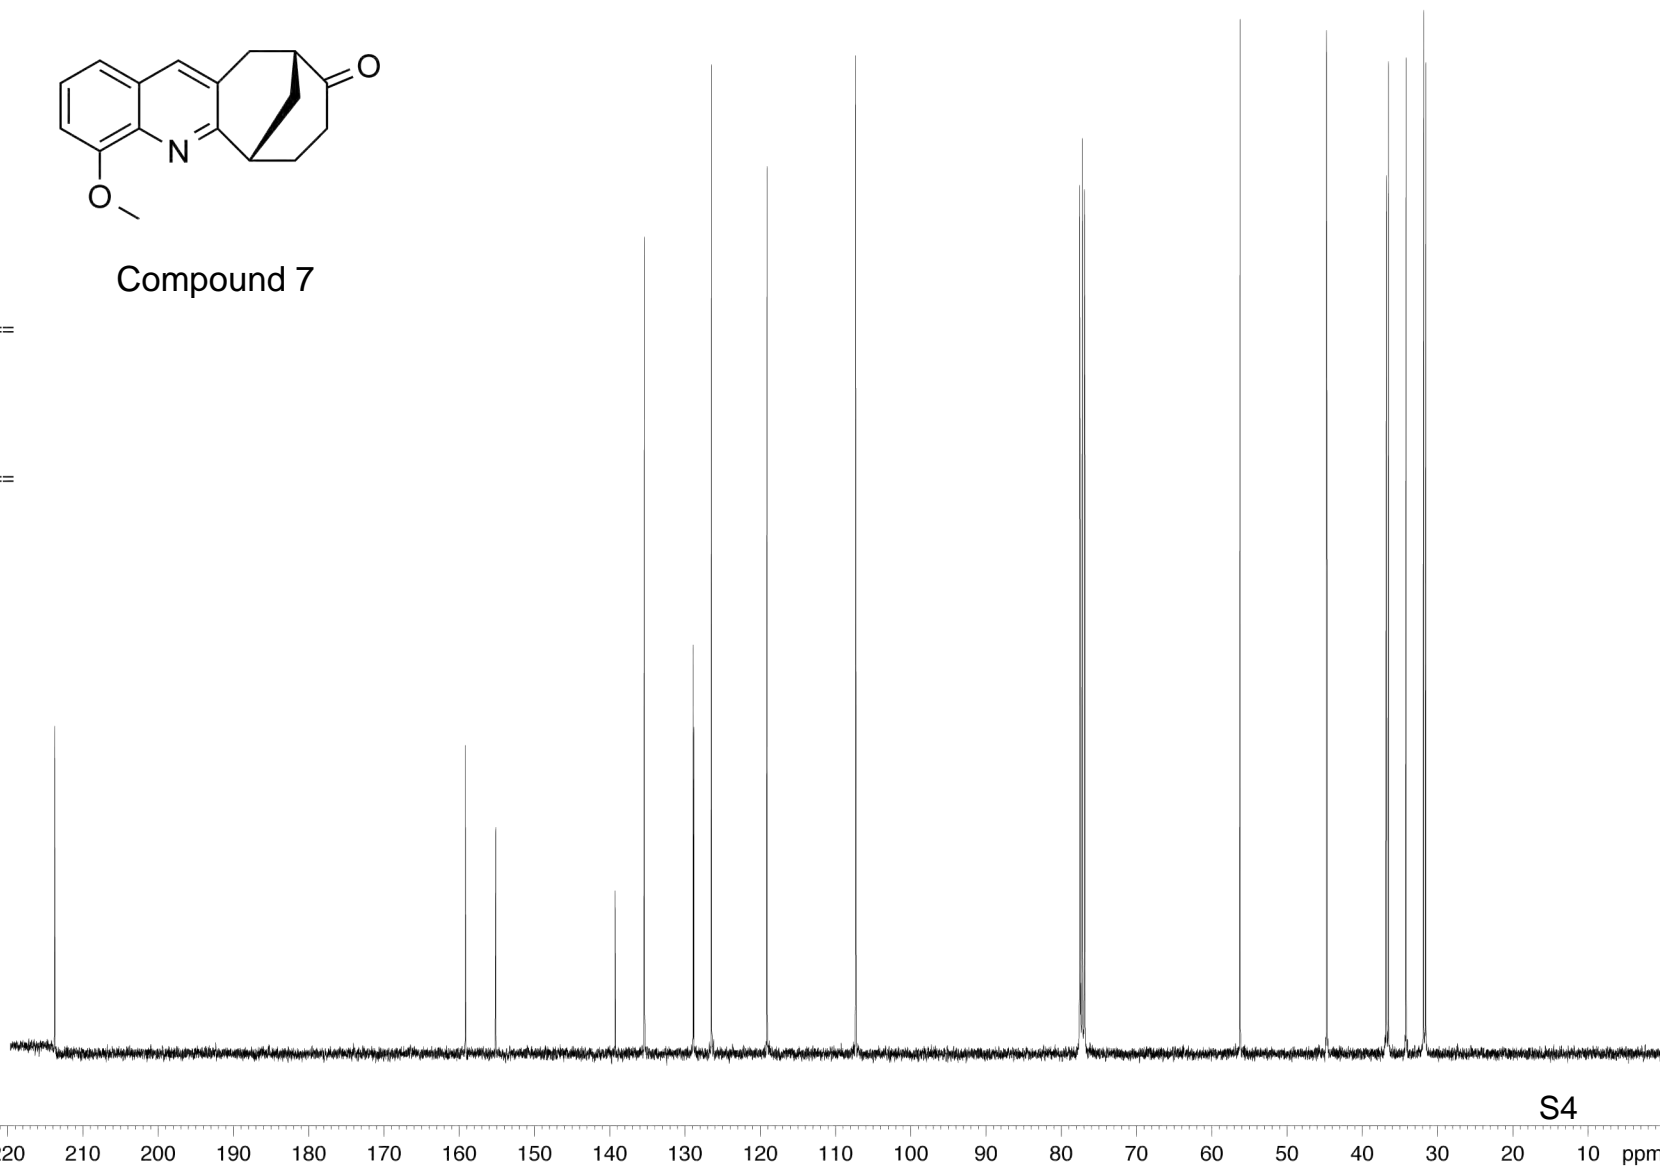

NAME TW1099\_2b  
 EXPNO 2  
 PROCNO 1  
 Date\_ 20130802  
 Time 19.17  
 INSTRUM spect  
 PROBHD 5 mm PABBO BB/  
 PULPROG zg30  
 TD 57690  
 SOLVENT CD2Cl2  
 NS 32  
 DS 2  
 SWH 7211.539 Hz  
 FIDRES 0.125005 Hz  
 AQ 3.9998901 sec  
 RG 362  
 DW 69.333 usec  
 DE 6.00 usec  
 TE 300.0 K  
 D1 0.00100000 sec  
 TD0 1

7.874  
 7.424  
 7.404  
 7.385  
 7.341  
 7.338  
 7.328  
 7.320  
 7.317  
 7.016  
 7.013  
 6.997  
 6.994

5.323  
 5.320  
 5.317

7.341  
 7.338  
 7.328  
 7.320  
 7.317

===== CHANNEL f1 =====  
 NUC1 1H  
 P1 9.10 usec  
 PL1 -5.00 dB  
 PL1W 27.00716019 W  
 SFO1 400.1334011 MHz  
 SI 131072  
 SF 400.1300155 MHz  
 WDW EM  
 SSB 0  
 LB 0.30 Hz  
 GB 0  
 PC 4.00

1H NMR of compound 7 in CD2Cl2 displaying  
 residual amounts of CHCl3.

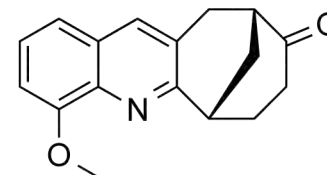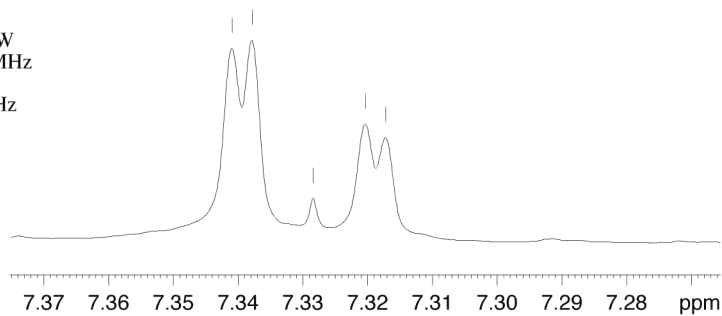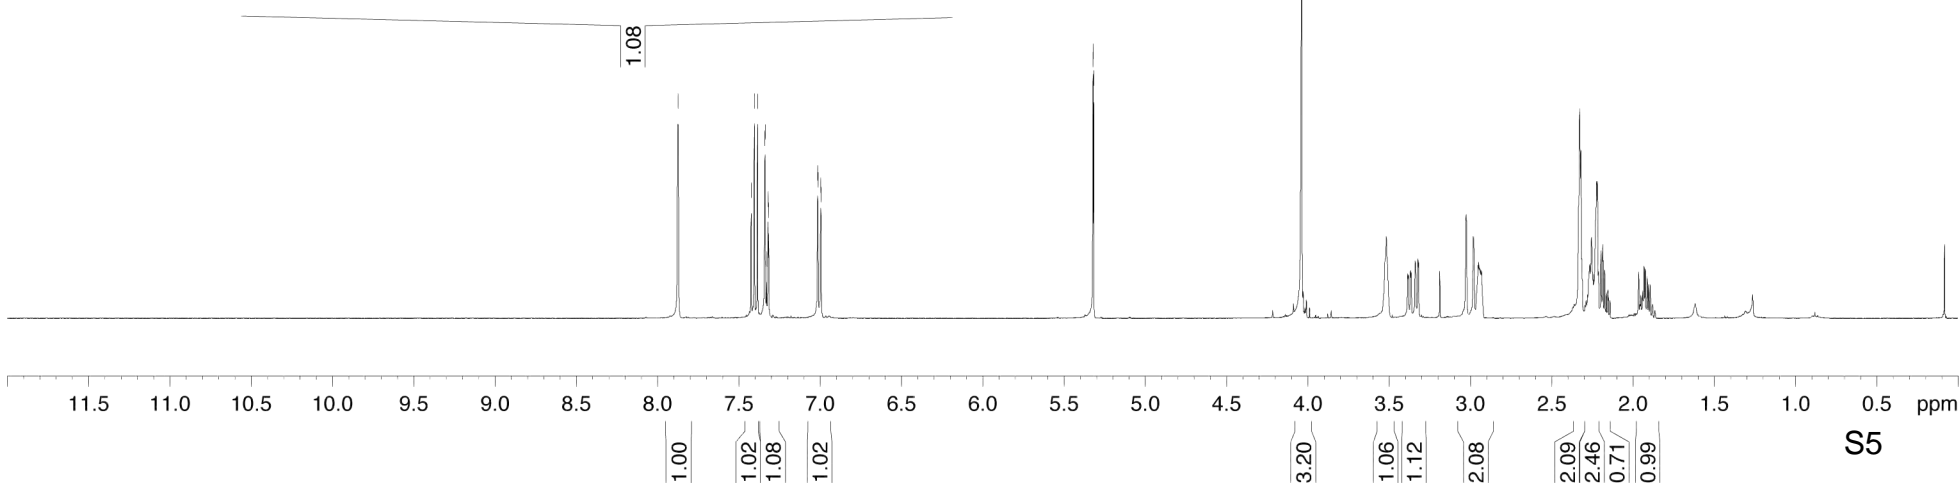

NAME TW938c  
 EXPNO 2  
 PROCNO 1  
 Date\_ 20121004  
 Time 15.49  
 INSTRUM spect  
 PROBHD 5 mm PABBO BB/  
 PULPROG zg30  
 TD 57690  
 SOLVENT CDCl3  
 NS 8  
 DS 2  
 SWH 7211.539 Hz  
 FIDRES 0.125005 Hz  
 AQ 3.9998901 sec  
 RG 228  
 DW 69.333 usec  
 DE 6.00 usec  
 TE 294.5 K  
 D1 0.00100000 sec  
 TD0 1

7.645  
 7.305  
 7.285  
 7.270  
 7.265  
 7.165  
 7.162  
 7.144  
 7.142  
 6.937  
 6.919

4.080  
 3.946  
 3.939  
 3.526  
 3.514  
 3.484  
 3.472  
 3.391  
 3.349

2.523  
 2.021

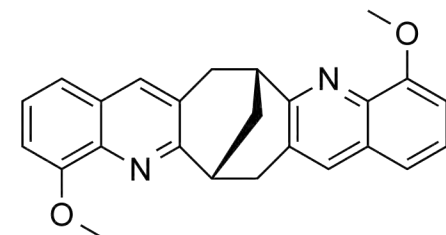

Compound 8

===== CHANNEL f1 =====  
 NUC1 1H  
 P1 10.00 usec  
 PL1 -4.00 dB  
 PL1W 21.45254898 W  
 SFO1 400.1334011 MHz  
 SI 131072  
 SF 400.1300059 MHz  
 WDW EM  
 SSB 0  
 LB 0.30 Hz  
 GB 0  
 PC 4.00

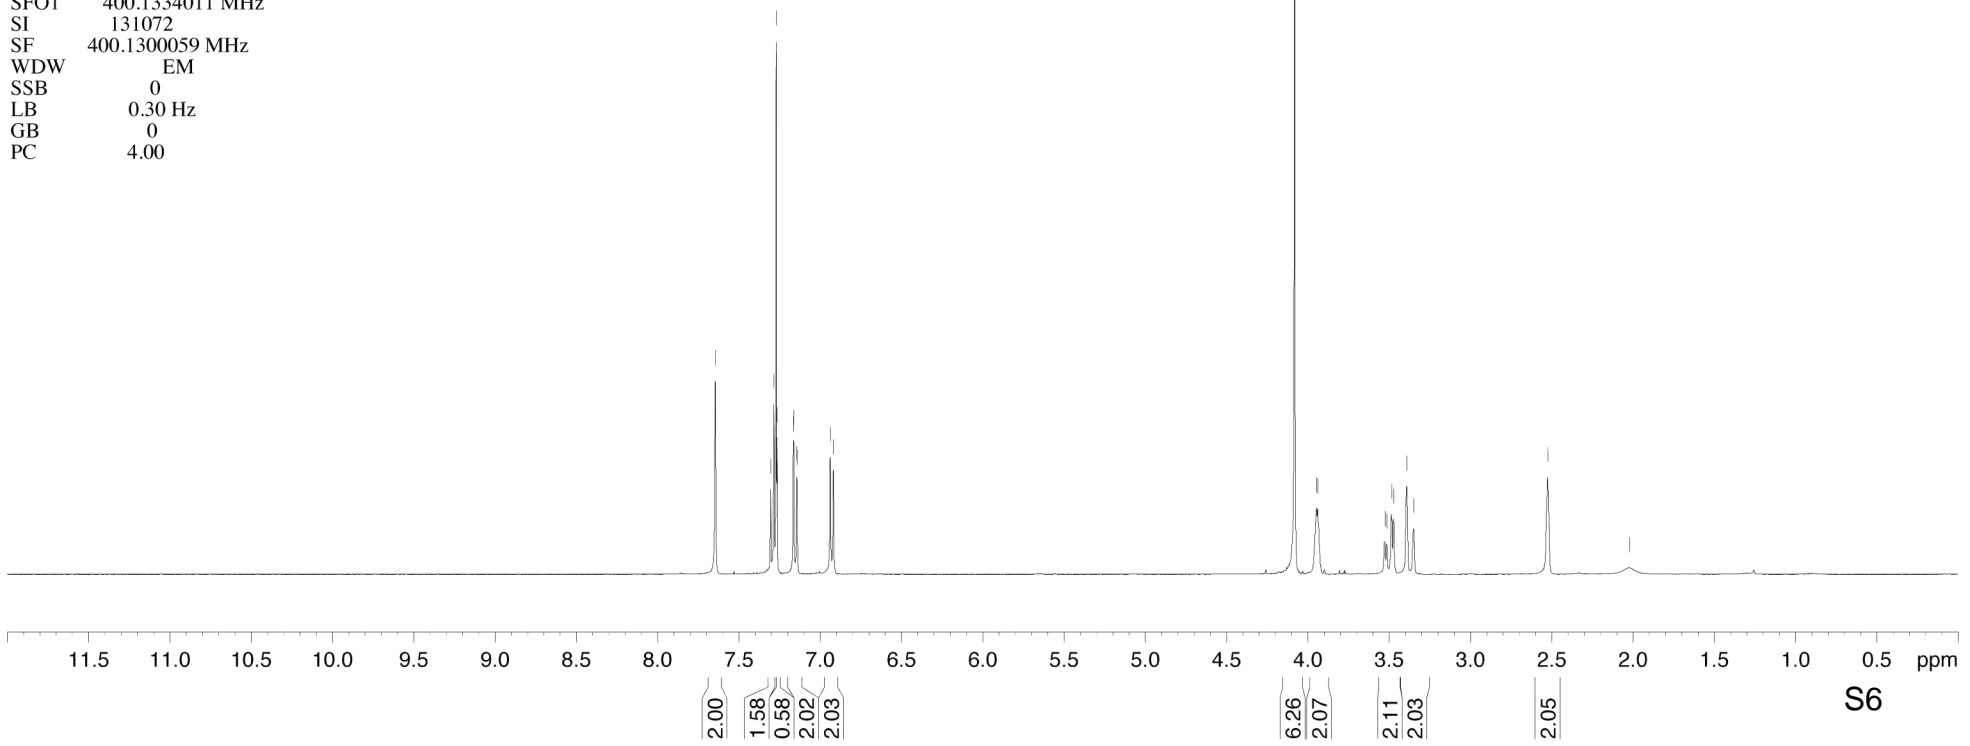

NAME TW938c  
 EXPNO 3  
 PROCNO 1  
 Date\_ 20121004  
 Time 15.59  
 INSTRUM spect  
 PROBHD 5 mm PABBO BB/  
 PULPROG zgdc30  
 TD 48074  
 SOLVENT CDCl3  
 NS 512  
 DS 4  
 SWH 24038.461 Hz  
 FIDRES 0.500030 Hz  
 AQ 0.9999892 sec  
 RG 57  
 DW 20.800 usec  
 DE 6.00 usec  
 TE 295.5 K  
 D1 0.00100000 sec  
 D11 0.03000000 sec  
 TD0 1

===== CHANNEL f1 =====  
 NUC1 13C  
 P1 8.50 usec  
 PL1 -3.00 dB  
 PL1W 58.63890457 W  
 SFO1 100.6228298 MHz

===== CHANNEL f2 =====  
 CPDPRG2 waltz16  
 NUC2 1H  
 PCPD2 80.00 usec  
 PL2 -4.00 dB  
 PL12 14.06 dB  
 PL2W 21.45254898 W  
 PL12W 0.33533499 W  
 SFO2 400.1316005 MHz  
 SI 32768  
 SF 100.6127592 MHz

160.600 154.948 139.192 136.100 129.175 128.687 125.871 119.066 106.880  
 77.477 77.159 76.841 56.174 38.541 36.362 29.138

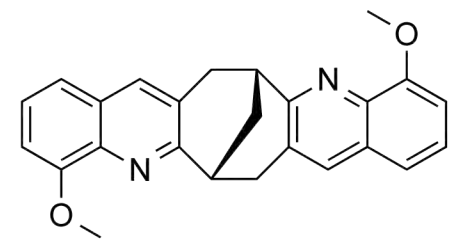

Compound 8

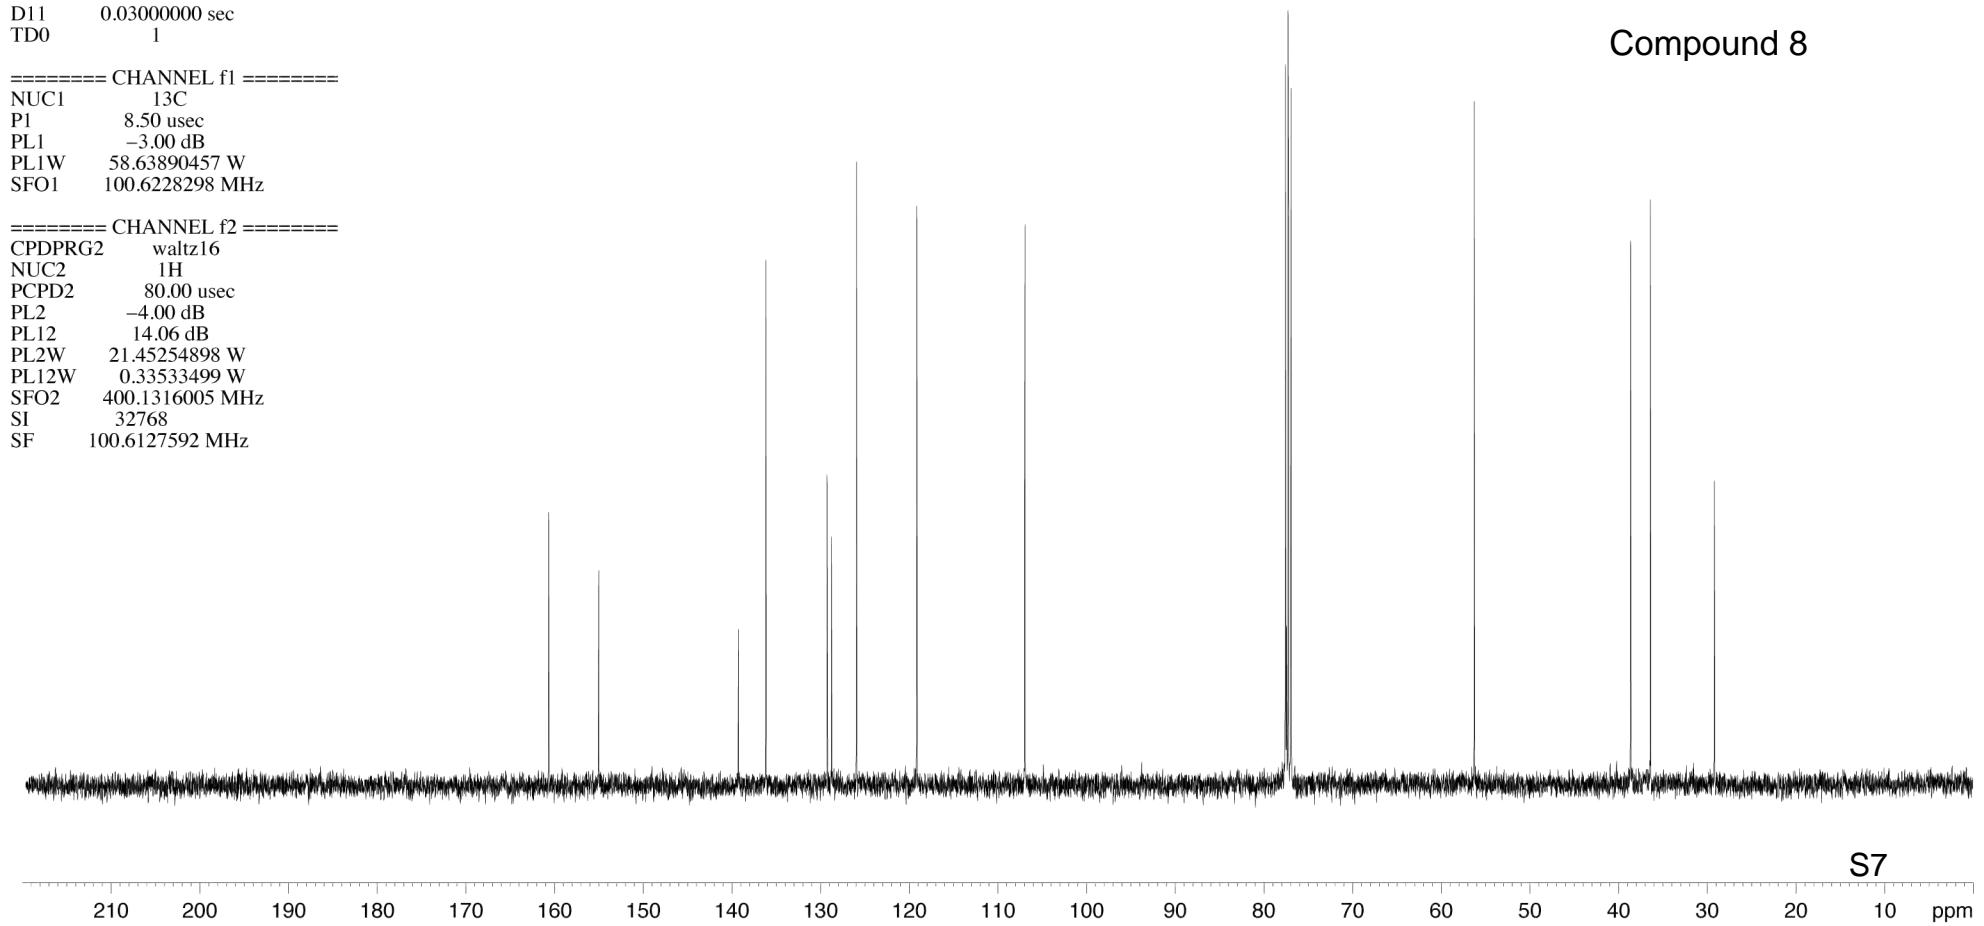

NAME TW1099\_2a  
EXPNO 3  
PROCNO 1  
Date\_ 20130628  
Time 18.59  
INSTRUM spect  
PROBHD 5 mm PABBO BB/  
PULPROG zg30  
TD 57690  
SOLVENT C6D6  
NS 32  
DS 2  
SWH 7211.539 Hz  
FIDRES 0.125005 Hz  
AQ 3.9998901 sec  
RG 228  
DW 69.333 usec  
DE 6.00 usec  
TE 294.5 K  
D1 0.00100000 sec  
TD0 1

===== CHANNEL f1 =====  
NUC1 1H  
P1 9.10 usec  
PL1 -5.00 dB  
PL1W 27.00716019 W  
SFO1 400.1334011 MHz  
SI 131072  
SF 400.1300450 MHz  
WDW EM  
SSB 0  
LB 0.30 Hz  
GB 0  
PC 4.00

9.583  
9.581  
9.306

7.406  
7.160  
7.132  
7.108  
7.088  
7.069  
6.961  
6.959  
6.941  
6.938  
6.570  
6.567  
6.551  
6.548  
6.269  
3.699  
3.694  
3.690  
3.681  
3.574  
3.524  
3.515  
3.330  
3.285  
3.180  
3.137  
3.060  
3.057  
3.046  
3.043  
3.018  
3.015  
3.005  
3.001  
2.916  
2.912  
2.902  
2.898  
2.873  
2.868  
2.859  
2.854  
1.950  
1.945  
1.940  
1.935  
1.929  
1.918  
1.913  
1.907  
1.902  
1.897  
1.867  
1.861

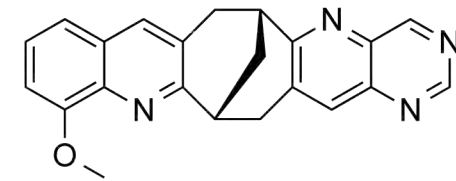

Compound 9 displaying  
residual CHCl<sub>3</sub>

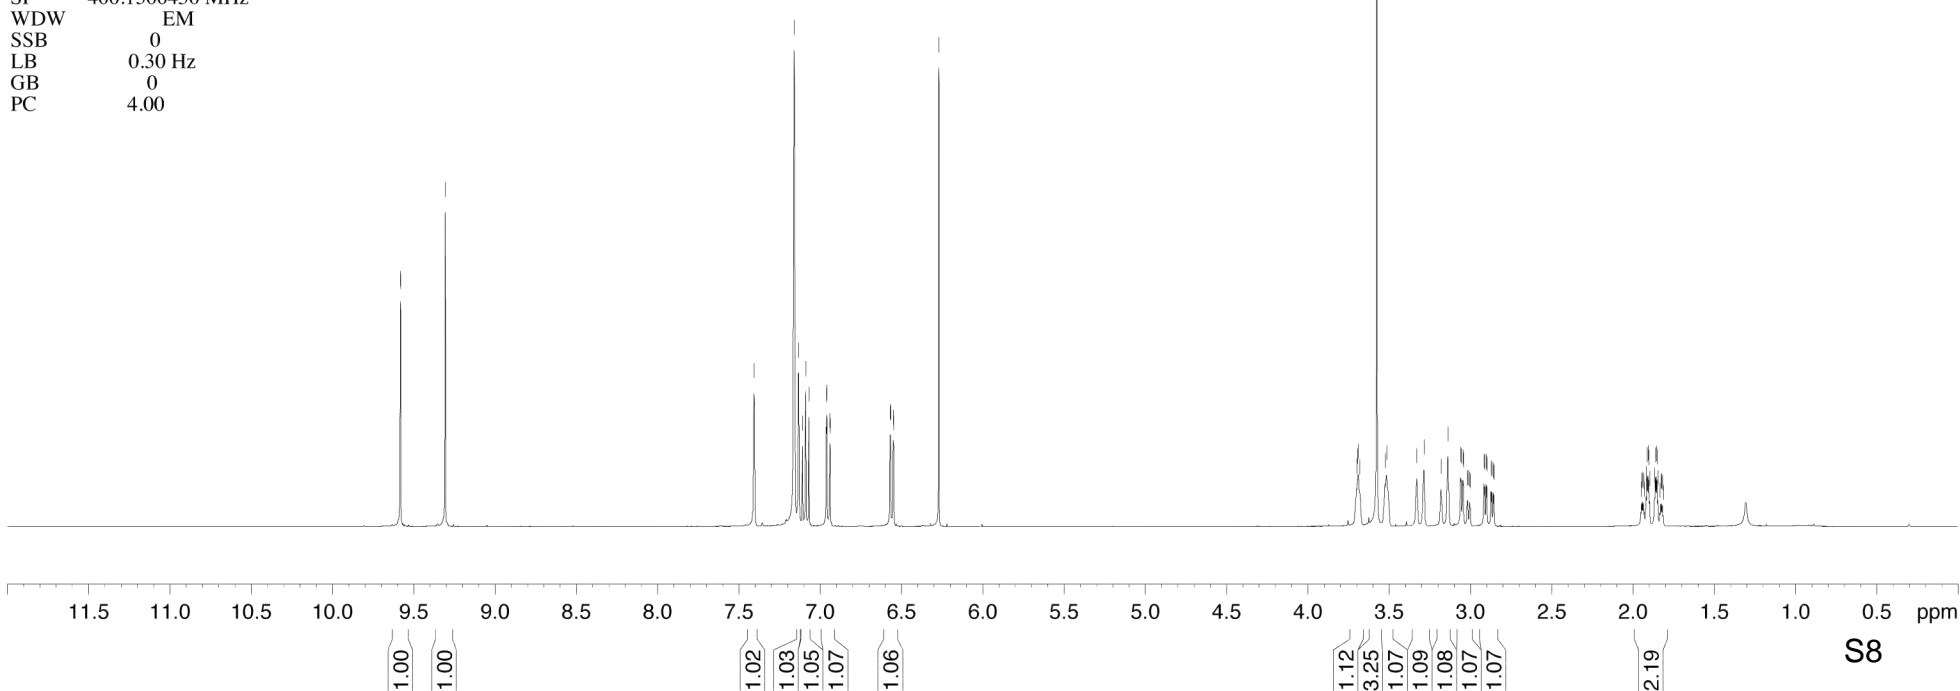



NAME TW1099\_2a  
 EXPNO 4  
 PROCNO 1  
 Date\_ 20130629  
 Time 2.34  
 INSTRUM spect  
 PROBHD 5 mm PABBO BB/  
 PULPROG zgdc30  
 TD 48074  
 SOLVENT C6D6  
 NS 4000  
 DS 4  
 SWH 24038.461 Hz  
 FIDRES 0.500030 Hz  
 AQ 0.9999892 sec  
 RG 57  
 DW 20.800 usec  
 DE 6.00 usec  
 TE 295.6 K  
 D1 0.00100000 sec  
 D11 0.03000000 sec  
 TD0 1

===== CHANNEL f1 =====  
 NUC1 13C  
 P1 8.00 usec  
 PL1 -4.00 dB  
 PL1W 73.82200623 W  
 SFO1 100.6228298 MHz

===== CHANNEL f2 =====  
 CPDPRG2 waltz16  
 NUC2 1H  
 PCPD2 80.00 usec  
 PL2 -5.00 dB  
 PL12 13.88 dB  
 PL2W 27.00716019 W  
 PL12W 0.34952554 W  
 SFO2 400.1316005 MHz  
 SI 131072  
 SF 100.6127443 MHz

164.526  
 160.757  
 159.551  
 156.089  
 155.608  
 145.742  
 140.217  
 139.516  
 137.424  
 136.060  
 135.659  
 128.972  
 128.364  
 128.301  
 128.060  
 127.819  
 126.206  
 119.011

107.368

77.801

55.382

38.665

38.198

36.866

36.106

28.564

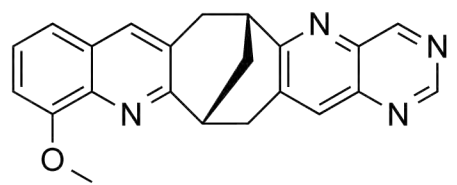

Compound 9

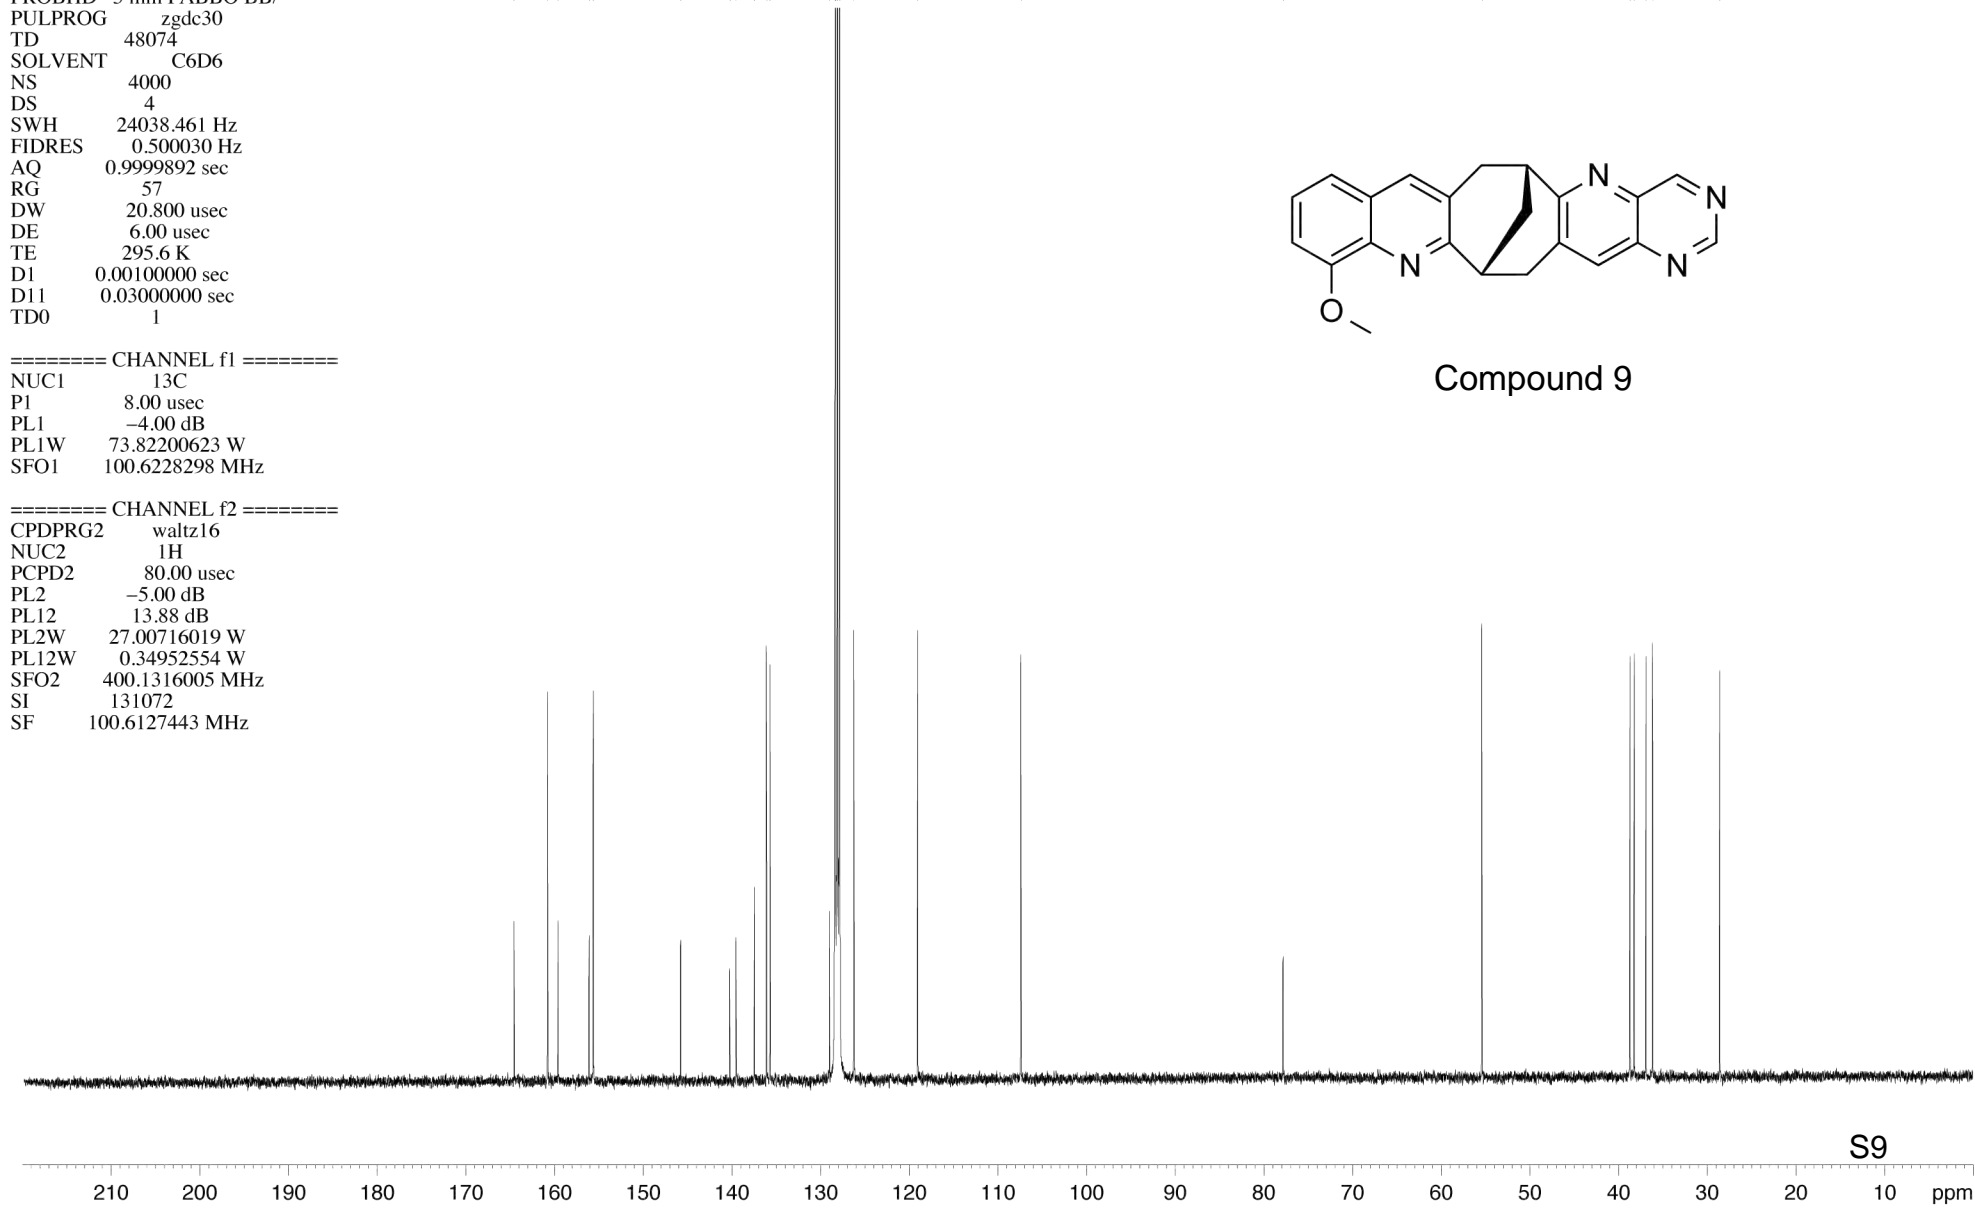

NAME TW955  
 EXPNO 1  
 PROCNO 1  
 Date\_ 20130110  
 Time 16.50  
 INSTRUM spect  
 PROBHD 5 mm PABBO BB/  
 PULPROG zg30  
 TD 57690  
 SOLVENT CDCl3  
 NS 8  
 DS 2  
 SWH 7211.539 Hz  
 FIDRES 0.125005 Hz  
 AQ 3.9998901 sec  
 RG 128  
 DW 69.333 usec  
 DE 6.00 usec  
 TE 294.6 K  
 D1 0.00100000 sec  
 TD0 1

===== CHANNEL f1 =====  
 NUC1 1H  
 P1 10.00 usec  
 PL1 -4.00 dB  
 PL1W 21.45254898 W  
 SFO1 400.1334011 MHz  
 SI 131072  
 SF 400.1300058 MHz  
 WDW EM  
 SSB 0  
 LB 0.00 Hz  
 GB 0  
 PC 4.00

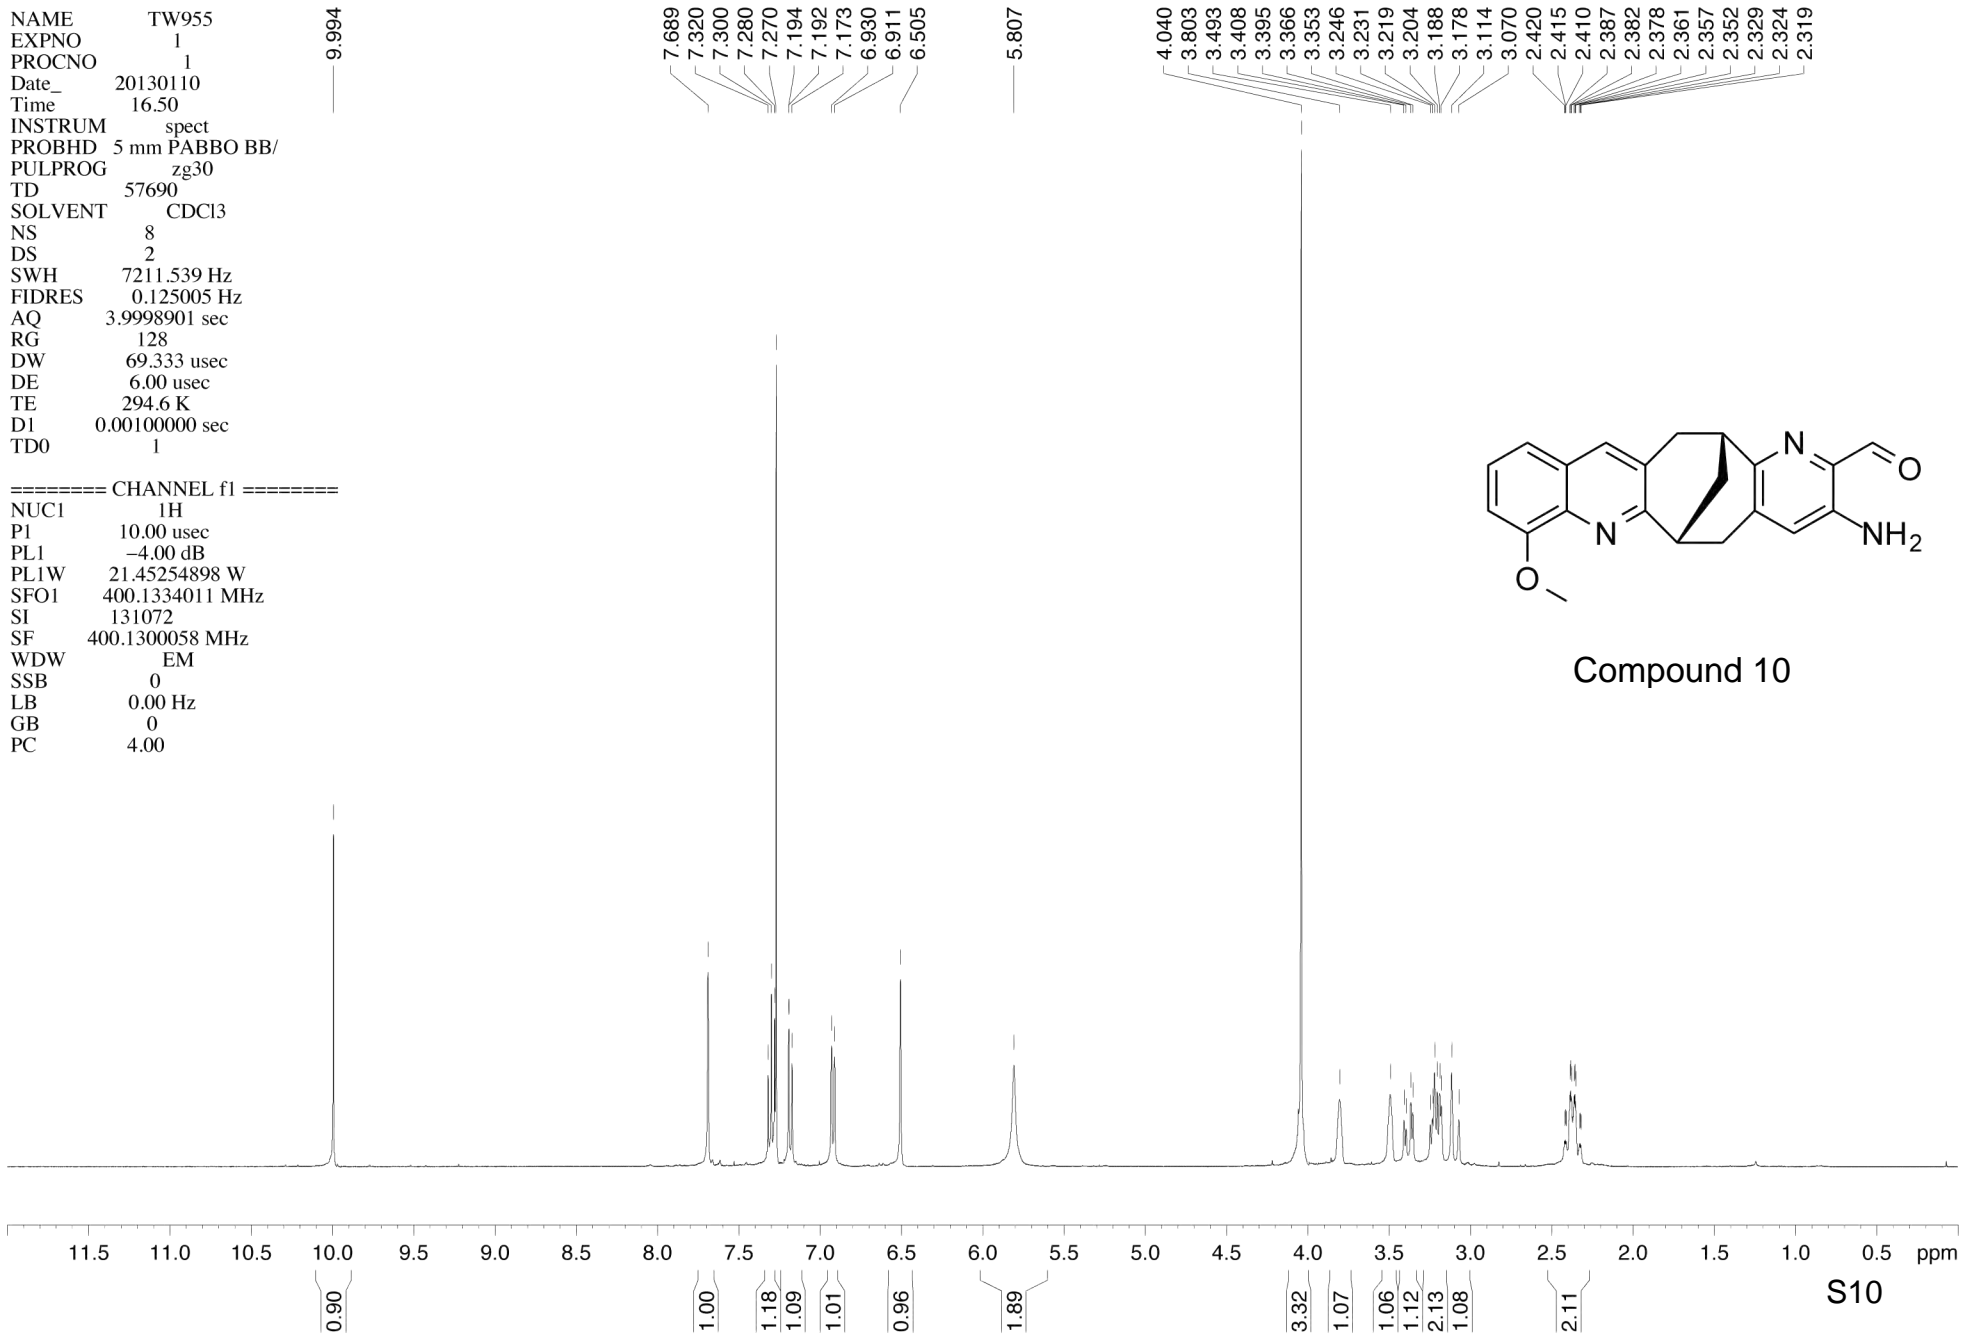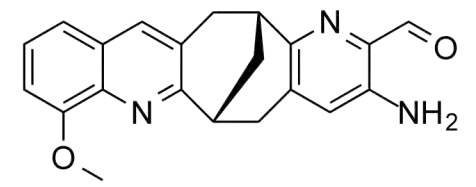

Compound 10

NAME TW955  
 EXPNO 2  
 PROCNO 1  
 Date\_ 20130110  
 Time 17.27  
 INSTRUM spect  
 PROBHD 5 mm PABBO BB/  
 PULPROG zgdc30  
 TD 48074  
 SOLVENT CDCl3  
 NS 512  
 DS 4  
 SWH 24038.461 Hz  
 FIDRES 0.500030 Hz  
 AQ 0.9999892 sec  
 RG 57  
 DW 20.800 usec  
 DE 6.00 usec  
 TE 295.7 K  
 D1 0.00100000 sec  
 D11 0.03000000 sec  
 TD0 1

195.767

160.246  
 154.829  
 149.720  
 144.814  
 139.067  
 137.097  
 136.343  
 133.529  
 129.034  
 128.685  
 126.024  
 124.367  
 119.038

106.980

77.480  
 77.162  
 76.844

56.108

38.498  
 37.761  
 35.824  
 34.707  
 29.148

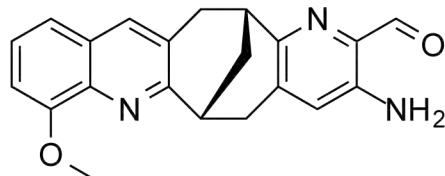

Compound 10

===== CHANNEL f1 =====  
 NUC1 13C  
 P1 8.50 usec  
 PL1 -3.00 dB  
 PL1W 58.63890457 W  
 SFO1 100.6228298 MHz

===== CHANNEL f2 =====  
 CPDPRG2 waltz16  
 NUC2 1H  
 PCPD2 80.00 usec  
 PL2 -4.00 dB  
 PL12 14.06 dB  
 PL2W 21.45254898 W  
 PL12W 0.33533499 W  
 SFO2 400.1316005 MHz  
 SI 32768  
 SF 100.6127621 MHz

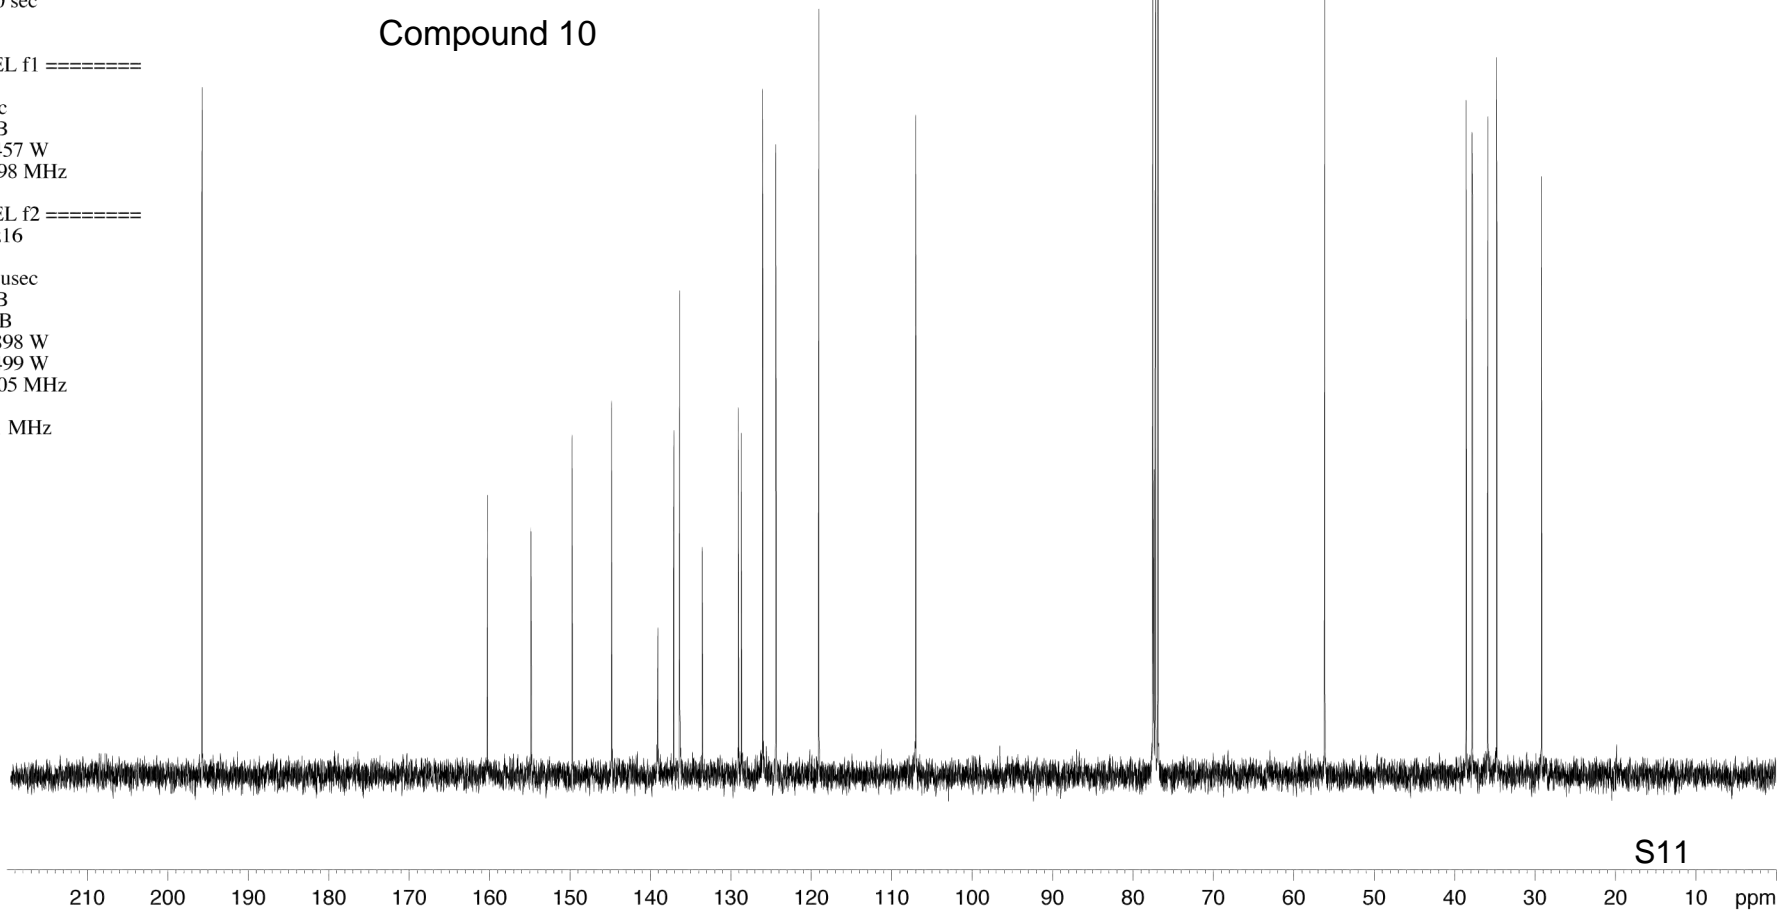

NAME TW1007a  
 EXPNO 6  
 PROCNO 1  
 Date\_ 20130802  
 Time 19.53  
 INSTRUM spect  
 PROBHD 5 mm PABBO BB/  
 PULPROG zg30  
 TD 57690  
 SOLVENT CD2Cl2  
 NS 32  
 DS 2  
 SWH 7211.539 Hz  
 FIDRES 0.125005 Hz  
 AQ 3.9998901 sec  
 RG 406  
 DW 69.333 usec  
 DE 6.00 usec  
 TE 300.0 K  
 D1 0.00100000 sec  
 TD0 1

9.948  
9.947

7.711  
7.343  
7.325  
7.303  
7.227  
7.224  
7.207  
7.204  
6.954  
6.951  
6.934  
6.932  
6.604  
5.734  
5.332  
5.322  
5.320  
5.317  
4.036  
4.018  
3.681  
3.487  
3.483  
3.429  
3.426  
3.416  
3.413  
3.388  
3.385  
3.375  
3.372  
3.335  
3.332  
3.321  
3.318  
3.292  
3.289  
3.278  
3.275  
3.205  
3.164  
3.079  
3.035  
2.465  
2.459  
2.454  
2.449  
2.444  
2.432  
2.427  
2.422  
2.417  
2.408  
2.403  
2.398  
2.392  
2.381

===== CHANNEL f1 =====  
 NUC1 1H  
 P1 9.10 usec  
 PL1 -5.00 dB  
 PL1W 27.00716019 W  
 SFO1 400.1334011 MHz  
 SI 131072  
 SF 400.1300156 MHz  
 WDW EM  
 SSB 0  
 LB 0.30 Hz  
 GB 0  
 PC 4.00

1H NMR of compound 10 in CD2Cl2  
 displaying residual amount of CHCl3

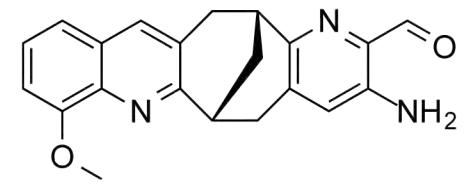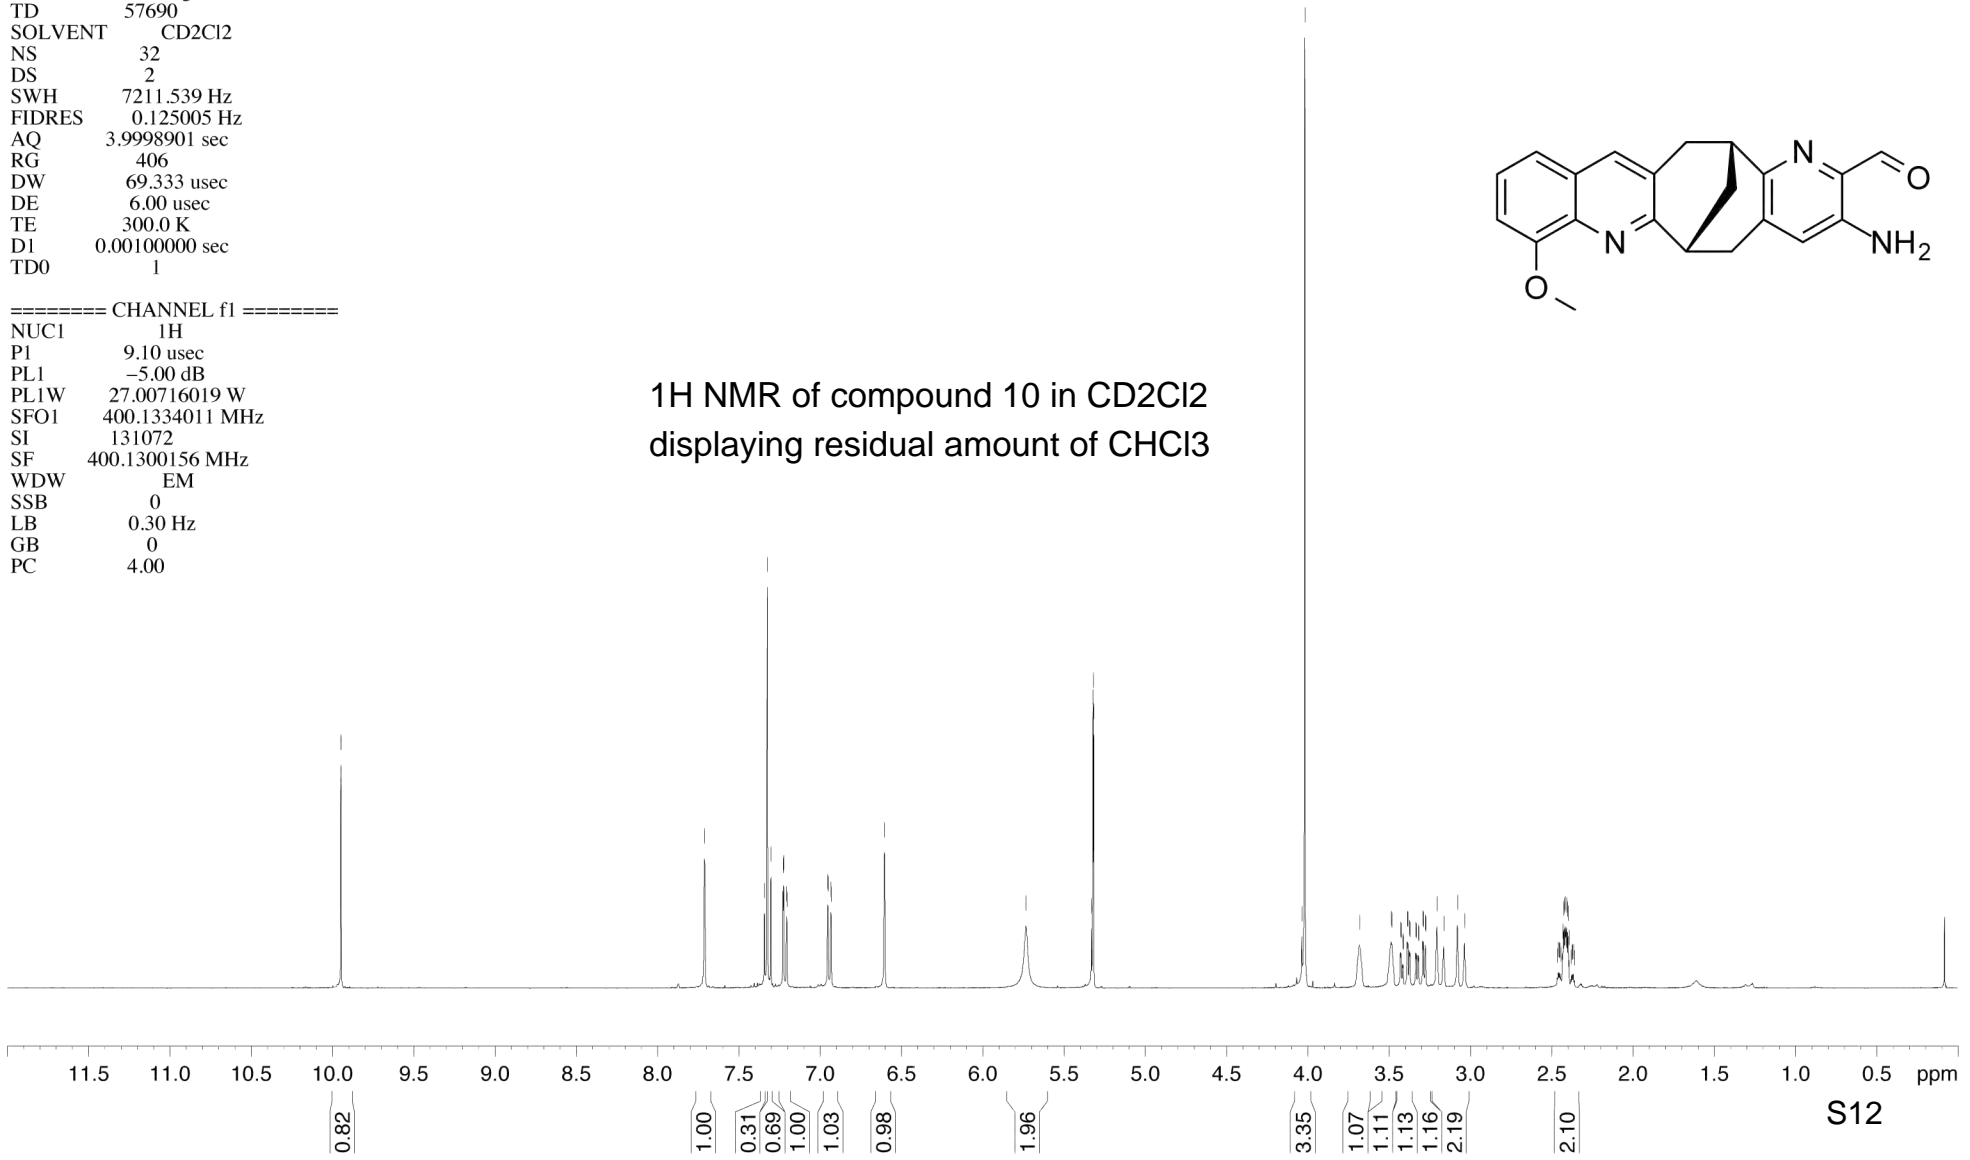

NAME TW999a  
 EXPNO 2  
 PROCNO 1  
 Date\_ 20130218  
 Time 18.27  
 INSTRUM spect  
 PROBHD 5 mm PABBO BB/  
 PULPROG zg30  
 TD 57690  
 SOLVENT CDCl3  
 NS 32  
 DS 2  
 SWH 7211.539 Hz  
 FIDRES 0.125005 Hz  
 AQ 3.9998901 sec  
 RG 456  
 DW 69.333 usec  
 DE 6.00 usec  
 TE 294.4 K  
 D1 0.00100000 sec  
 TD0 1

===== CHANNEL f1 =====  
 NUC1 1H  
 P1 10.00 usec  
 PL1 -4.00 dB  
 PL1W 21.45254898 W  
 SFO1 400.1334011 MHz  
 SI 131072  
 SF 400.1300058 MHz  
 WDW EM  
 SSB 0  
 LB 0.30 Hz  
 GB 0  
 PC 4.00

9.518  
 9.212  
 7.864  
 7.782  
 7.524  
 7.294  
 7.270  
 7.255  
 7.081  
 7.062  
 6.942  
 6.923

4.155  
 4.137  
 4.119  
 4.101  
 4.083  
 3.945  
 3.860  
 3.785  
 3.737  
 3.650  
 3.637  
 3.607  
 3.594  
 3.563  
 3.520  
 3.495  
 3.482  
 3.456  
 3.414  
 3.388  
 3.349  
 3.307  
 3.183  
 3.142  
 2.618  
 2.585  
 2.556  
 2.523  
 2.053  
 1.664  
 1.284  
 1.266  
 1.248

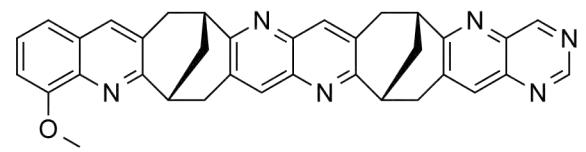

Compound 12

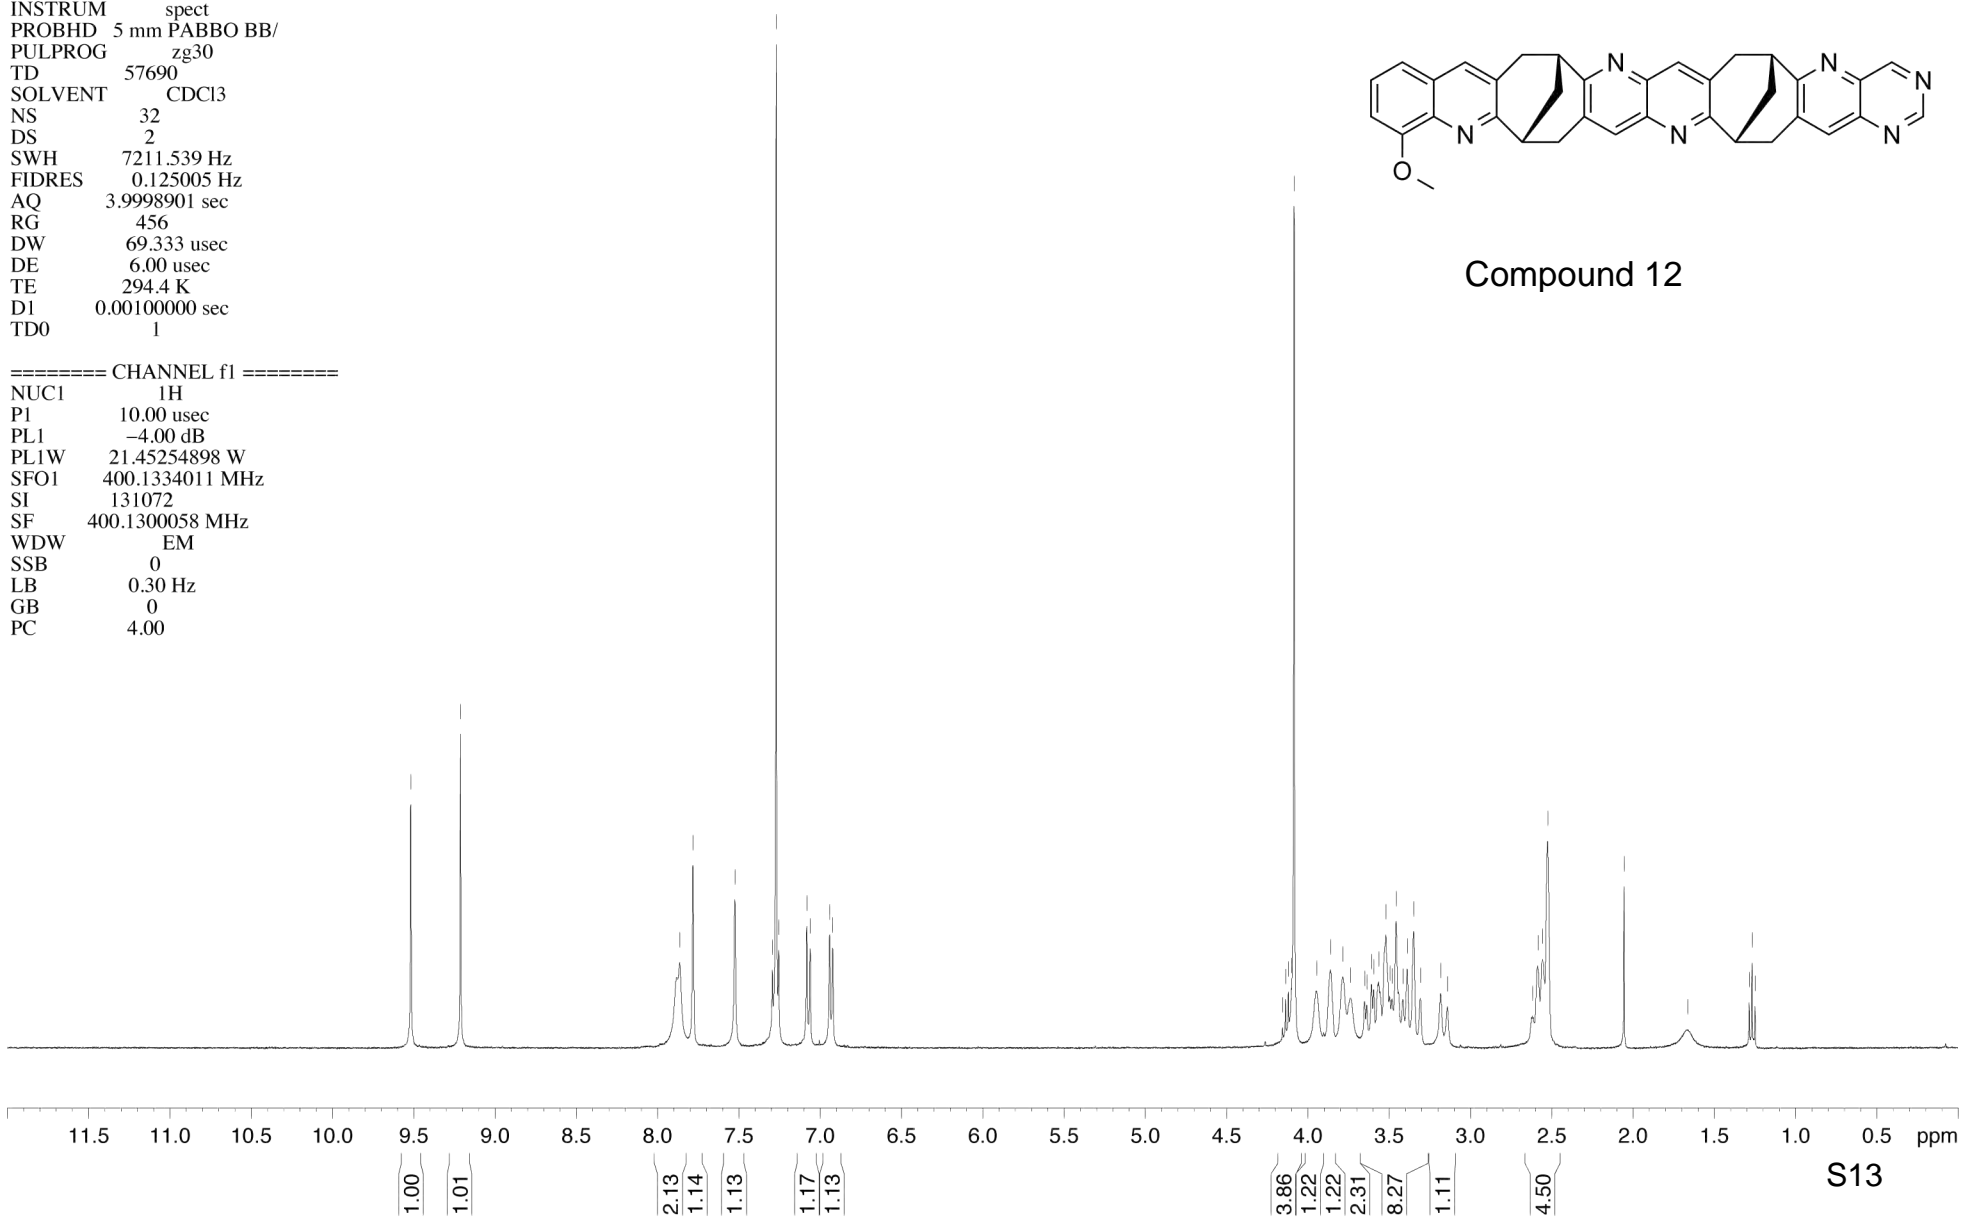

NAME TW1020a  
EXPNO 2  
PROCNO 1  
Date\_ 20130303  
Time 18.31  
INSTRUM spect  
PROBHD 5 mm PABBO BB/  
PULPROG zgdc30  
TD 48074  
SOLVENT CDCl3  
NS 2048  
DS 4  
SWH 24038.461 Hz  
FIDRES 0.500030 Hz  
AQ 0.9999892 sec  
RG 57  
DW 20.800 usec  
DE 6.00 usec  
TE 295.7 K  
D1 0.00100000 sec  
D11 0.03000000 sec  
TD0 1

===== CHANNEL f1 =====  
NUC1 13C  
P1 8.50 usec  
PL1 -3.00 dB  
PL1W 58.63890457 W  
SFO1 100.6228298 MHz

===== CHANNEL f2 =====  
CPDPRG2 waltz16  
NUC2 1H  
PCPD2 80.00 usec  
PL2 -4.00 dB  
PL12 14.06 dB  
PL2W 21.45254898 W  
PL12W 0.33533499 W  
SFO2 400.1316005 MHz  
SI 32768  
SF 100.6127604 MHz

164.554  
162.402  
160.769  
160.750  
159.974  
155.192  
154.900  
145.316  
141.828  
141.437  
139.234  
139.078  
137.504  
136.183  
136.149  
135.915  
135.887  
132.232  
130.691  
128.528  
126.513  
126.033  
118.873  
107.001

77.477  
77.159  
76.841

56.199

38.806  
38.682  
38.376  
38.293  
36.438  
36.412  
36.029  
35.762  
28.984  
28.640

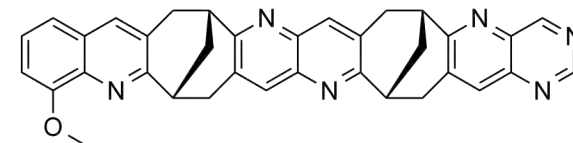

Compound 12

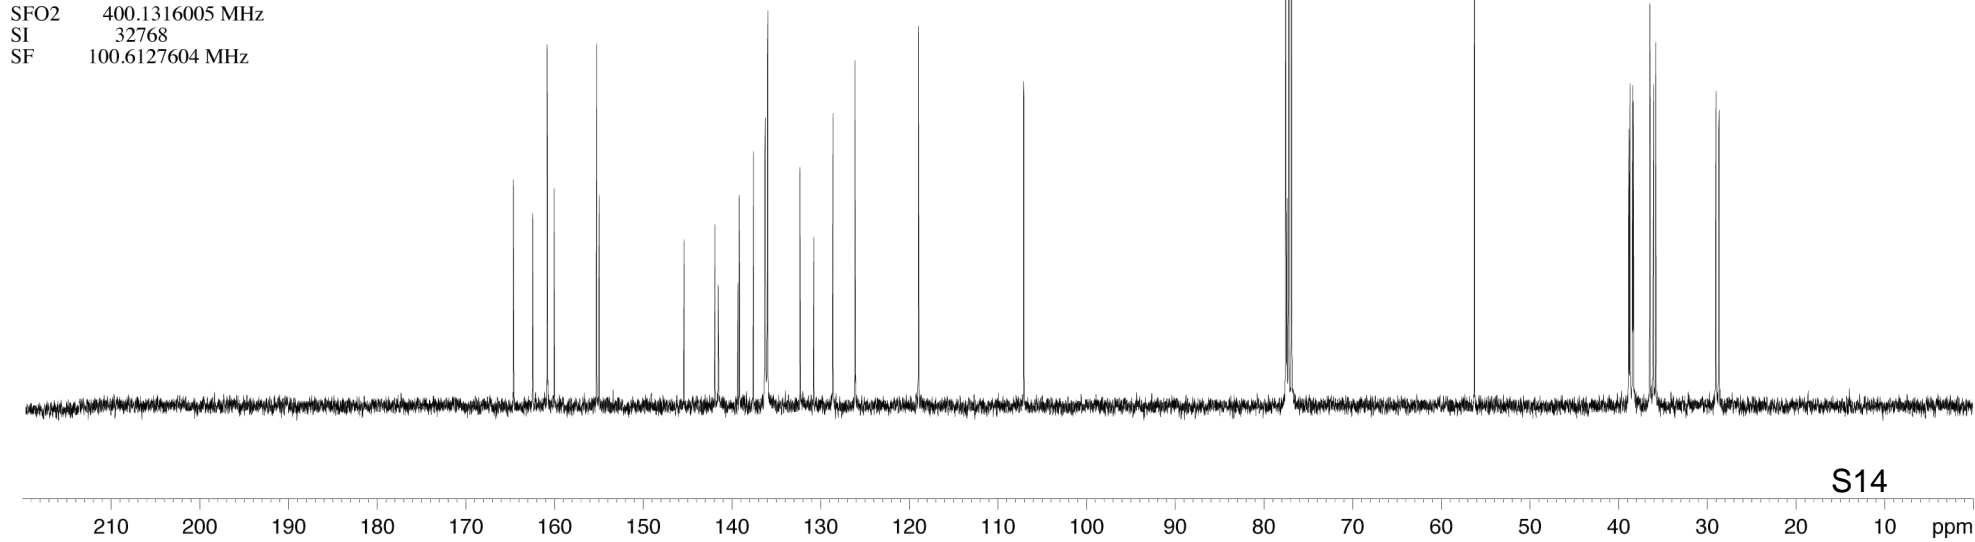

NAME TW1009a  
 EXPNO 1  
 PROCNO 1  
 Date\_ 20130219  
 Time 17.05  
 INSTRUM spect  
 PROBHD 5 mm PABBO BB/  
 PULPROG zg30  
 TD 57690  
 SOLVENT CDCl3  
 NS 32  
 DS 2  
 SWH 7211.539 Hz  
 FIDRES 0.125005 Hz  
 AQ 3.9998901 sec  
 RG 203  
 DW 69.333 usec  
 DE 6.00 usec  
 TE 294.6 K  
 D1 0.00100000 sec  
 TD0 1

9.973  
9.971

7.902  
7.825  
7.535  
7.287  
7.270  
7.247  
7.103  
7.101  
7.083  
7.081  
6.926  
6.923  
6.906  
6.400

5.689  
4.065  
3.920  
3.733  
3.603  
3.552  
3.541  
3.509  
3.495  
3.475  
3.458  
3.444  
3.430  
3.418  
3.405  
3.388  
3.265  
3.216  
3.183  
3.173  
2.934  
2.890  
2.507  
2.446  
2.441  
2.436  
2.414  
2.409  
2.404  
2.368  
2.363  
2.358  
2.336  
2.325

===== CHANNEL f1 =====  
 NUC1 1H  
 P1 10.00 usec  
 PL1 -4.00 dB  
 PL1W 21.45254898 W  
 SFO1 400.1334011 MHz  
 SI 131072  
 SF 400.1300058 MHz  
 WDW EM  
 SSB 0  
 LB 0.20 Hz  
 GB 0  
 PC 4.00

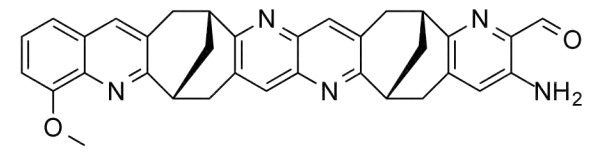

Compound 13

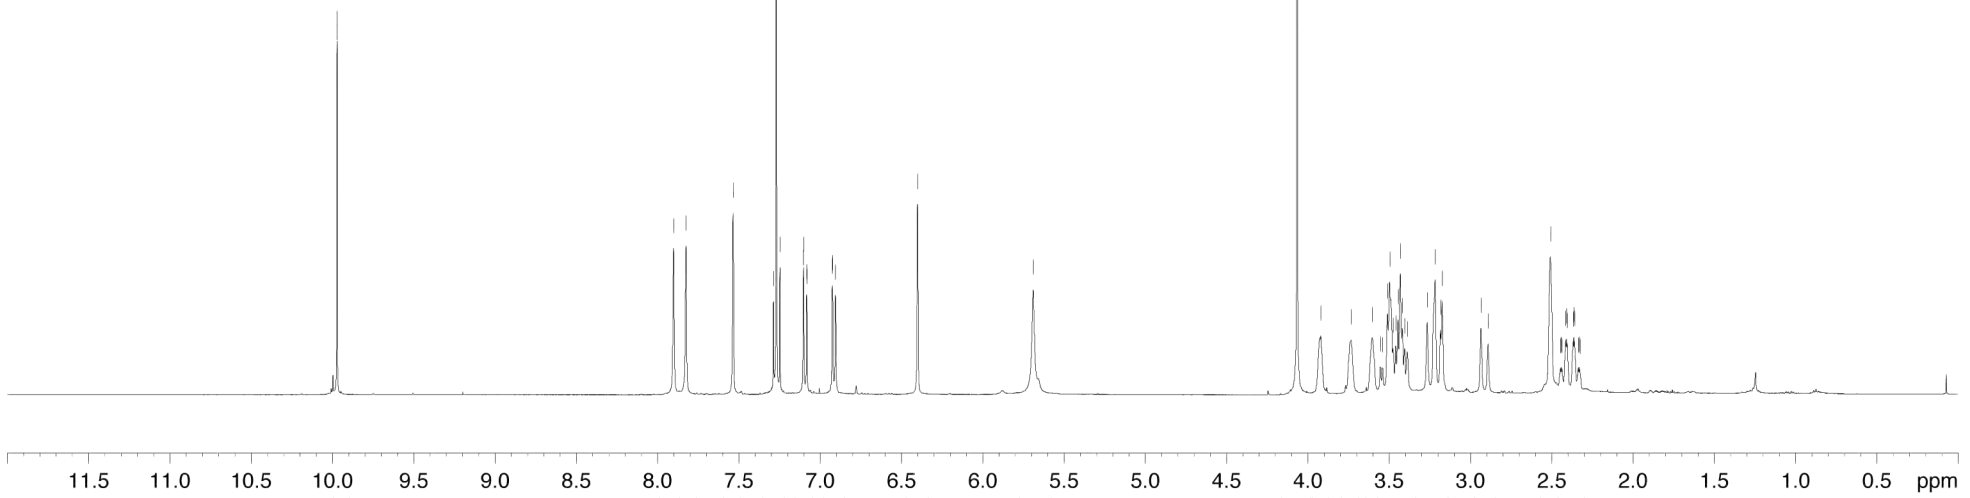

NAME TW1009a  
 EXPNO 7  
 PROCNO 1  
 Date\_ 20130220  
 Time 195.827  
 INSTRUM spect  
 PROBHD 5 mm PABBO BB/  
 PULPROG zgdc30  
 TD 48074  
 SOLVENT CDCl3  
 NS 2048  
 DS 4  
 SWH 24038.461 Hz  
 FIDRES 0.500030 Hz  
 AQ 0.9999892 sec  
 RG 57  
 DW 20.800 usec  
 DE 6.00 usec  
 TE 296.0 K  
 D1 0.00100000 sec  
 D11 0.03000000 sec  
 TD0 1

===== CHANNEL f1 =====  
 NUC1 13C  
 P1 8.50 usec  
 PL1 -3.00 dB  
 PL1W 58.63890457 W  
 SFO1 100.6228298 MHz

===== CHANNEL f2 =====  
 CPDPRG2 waltz16  
 NUC2 1H  
 PCPD2 80.00 usec  
 PL2 -4.00 dB  
 PL12 14.06 dB  
 PL2W 21.45254898 W  
 PL12W 0.33533499 W  
 SFO2 400.1316005 MHz  
 SI 32768  
 SF 100.6127581 MHz

162.135  
 161.624  
 160.141  
 154.945  
 149.410  
 144.672  
 141.553  
 139.269  
 136.660  
 136.316  
 136.075  
 136.061  
 135.981  
 133.706  
 131.997  
 131.731  
 128.683  
 128.589  
 126.007  
 124.220  
 118.969  
 106.997

77.482  
 77.163  
 76.847

38.708  
 38.376  
 38.334  
 38.001  
 36.407  
 36.111  
 35.931  
 34.520  
 29.123  
 29.039

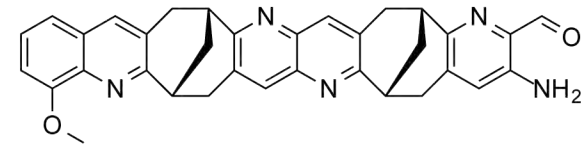

Compound 13

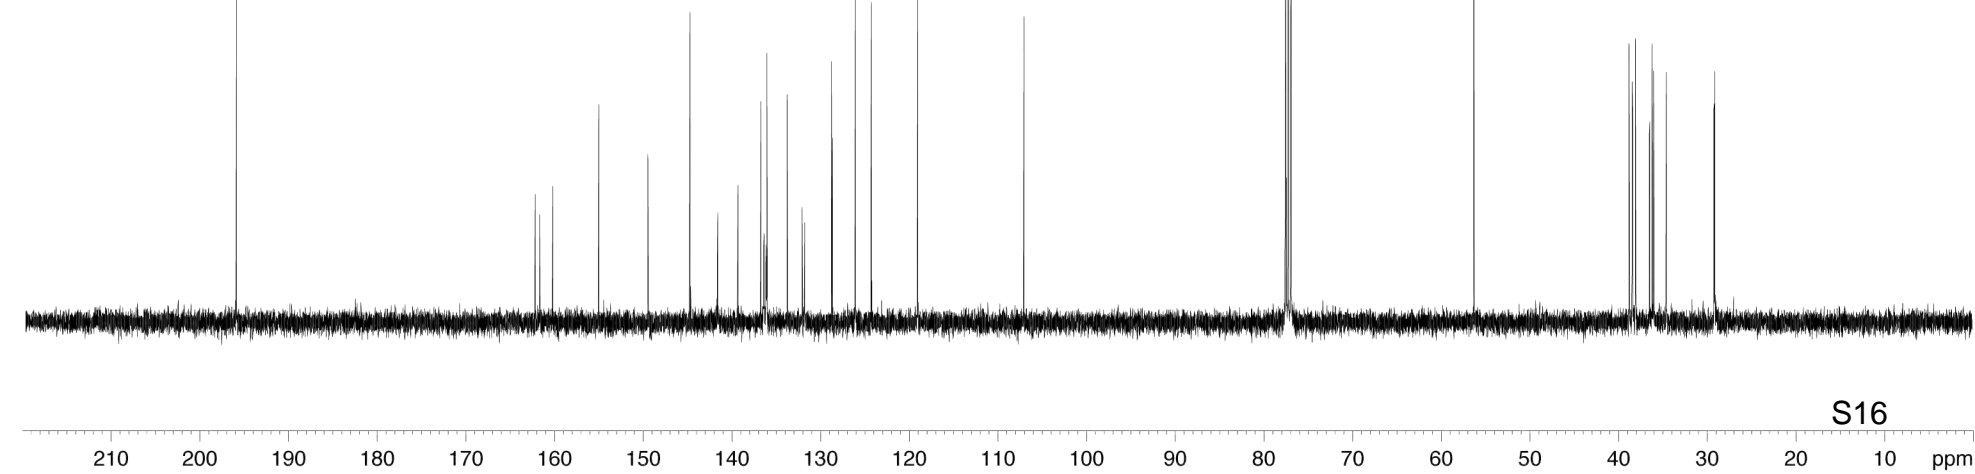



NAME TW1092c  
 EXPNO 1  
 PROCNO 1  
 Date\_ 20130516  
 Time 12.58  
 INSTRUM spect  
 PROBHD 5 mm PABBO BB/  
 PULPROG zg30  
 TD 57690  
 SOLVENT CDCl3  
 NS 16  
 DS 2  
 SWH 7211.539 Hz  
 FIDRES 0.125005 Hz  
 AQ 3.9998901 sec  
 RG 181  
 DW 69.333 usec  
 DE 6.00 usec  
 TE 295.0 K  
 D1 0.00100000 sec  
 TD0 1

9.531  
 9.529  
 9.270

7.839  
 7.803  
 7.760  
 7.696  
 7.685  
 7.549  
 7.362  
 7.342  
 7.322  
 7.270  
 7.238  
 7.235  
 7.217  
 7.215  
 6.957  
 6.955  
 6.938  
 6.936

4.080  
 3.909  
 3.835  
 3.700  
 3.654  
 3.611  
 3.569  
 3.555  
 3.520  
 3.510  
 3.481  
 3.467  
 3.444  
 3.430  
 3.415  
 3.391  
 3.365  
 3.322  
 3.248  
 3.203  
 3.183  
 3.164  
 3.140  
 3.079  
 3.038  
 2.539  
 2.507  
 2.482

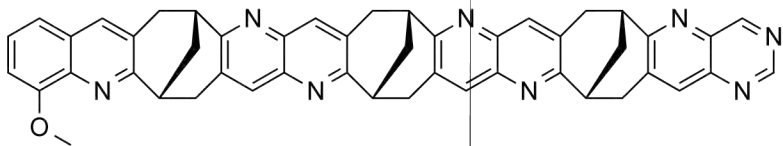

Compound 14

===== CHANNEL f1 =====  
 NUC1 1H  
 P1 9.10 usec  
 PL1 -5.00 dB  
 PL1W 27.00716019 W  
 SFO1 400.1334011 MHz  
 SI 131072  
 SF 400.1300058 MHz  
 WDW EM  
 SSB 0  
 LB 0.00 Hz  
 GB 0  
 PC 4.00

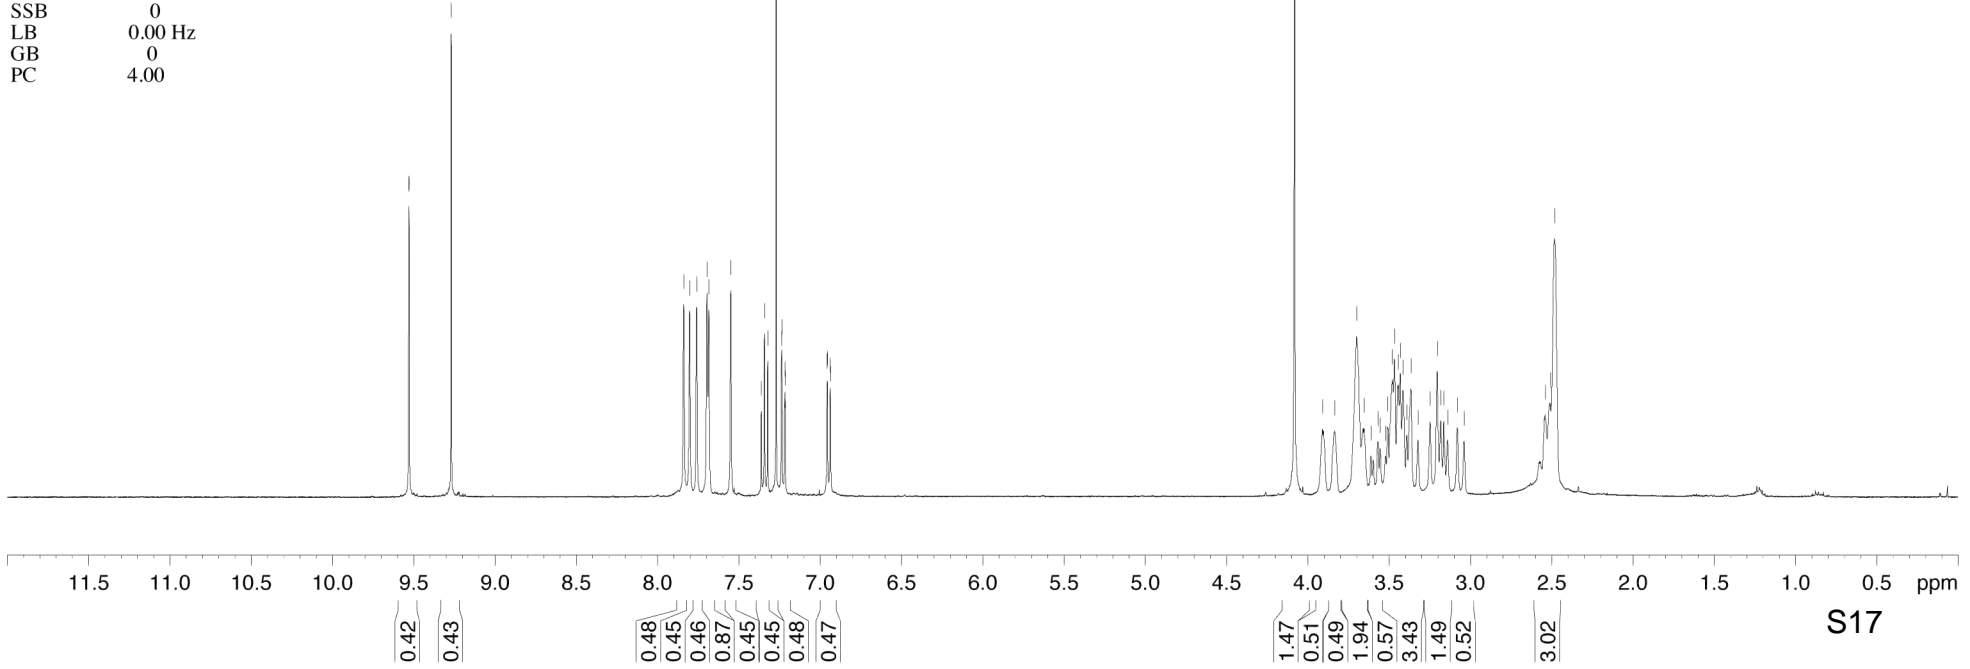

NAME TW1092c  
 EXPNO 2  
 PROCNO 1  
 Date\_ 20130517  
 Time 2.05  
 INSTRUM spect  
 PROBHD 5 mm PABBO BB/  
 PULPROG zgdc30  
 TD 48074  
 SOLVENT CDCl3  
 NS 7000  
 DS 4  
 SWH 24038.461 Hz  
 FIDRES 0.500030 Hz  
 AQ 0.9999892 sec  
 RG 57  
 DW 20.800 usec  
 DE 6.00 usec  
 TE 295.9 K  
 D1 0.00100000 sec  
 D11 0.03000000 sec  
 TD0 1

164.545  
 162.115  
 161.949  
 161.331  
 160.862  
 160.841  
 159.986  
 155.242  
 154.899  
 145.350  
 141.665  
 141.606  
 141.476  
 141.323  
 139.225  
 139.139  
 137.464  
 136.240  
 136.089  
 136.031  
 135.883  
 135.847  
 132.006  
 130.763  
 131.163  
 130.763  
 128.628  
 128.518  
 126.056  
 119.152  
 107.037

77.475  
 77.158  
 76.840

56.211  
 38.748  
 38.631  
 38.476  
 38.328  
 38.216  
 36.422  
 36.328  
 36.163  
 36.056  
 36.025  
 35.731  
 28.950  
 28.892  
 28.591

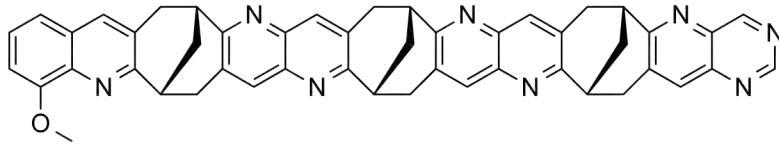

Compound 14

===== CHANNEL f1 =====  
 NUC1 13C  
 P1 8.00 usec  
 PL1 -4.00 dB  
 PL1W 73.82200623 W  
 SFO1 100.6228298 MHz

===== CHANNEL f2 =====  
 CPDPRG2 waltz16  
 NUC2 1H  
 PCPD2 80.00 usec  
 PL2 -5.00 dB  
 PL12 13.88 dB  
 PL2W 27.00716019 W  
 PL12W 0.34952554 W  
 SFO2 400.1316005 MHz  
 SI 32768  
 SF 100.6127598 MHz

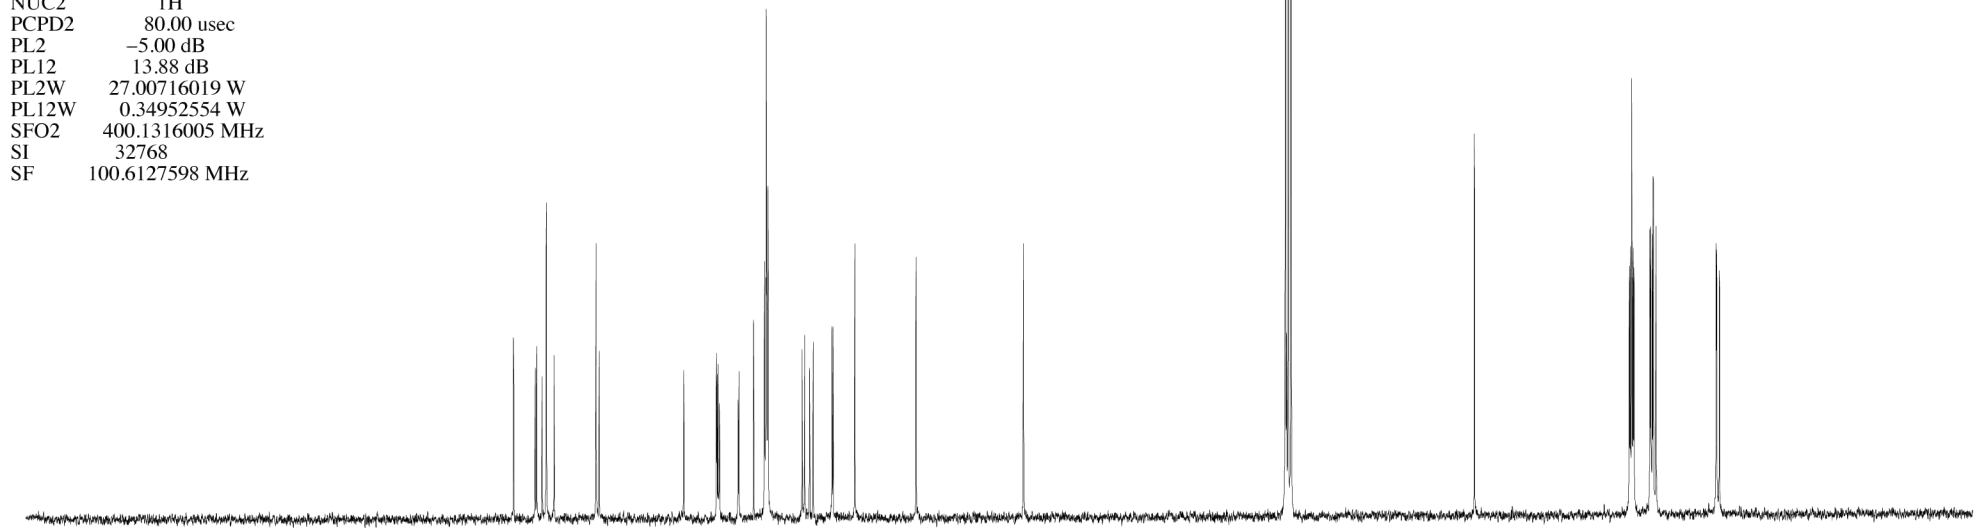

NAME TW1059a  
 EXPNO 1  
 PROCNO 1  
 Date\_ 20130326  
 Time 18.07  
 INSTRUM spect  
 PROBHD 5 mm PABBO BB/  
 PULPROG zg30  
 TD 57690  
 SOLVENT CDCl3  
 NS 16  
 DS 2  
 SWH 7211.539 Hz  
 FIDRES 0.125005 Hz  
 AQ 3.9998901 sec  
 RG 161  
 DW 69.333 usec  
 DE 6.00 usec  
 TE 294.1 K  
 D1 0.00100000 sec  
 TD0 1

9.987  
 7.870 7.816 7.753 7.691 7.506 7.270 7.254 7.234 7.057 7.038 6.927 6.908 6.407  
 5.723  
 5.282 4.071 3.904 3.704 3.546 3.534 3.521 3.479 3.443 3.432 3.418 3.405 3.389 3.376 3.253 3.211 3.195 3.178 3.169 3.150 3.134 3.088 2.867 2.823 2.481 2.405 2.373 2.333 2.305 2.300

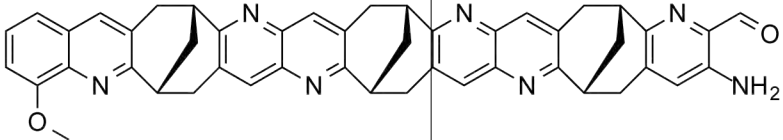

Compound 15

===== CHANNEL f1 =====  
 NUC1 1H  
 P1 10.00 usec  
 PL1 -4.00 dB  
 PL1W 21.45254898 W  
 SFO1 400.1334011 MHz  
 SI 131072  
 SF 400.1300056 MHz  
 WDW EM  
 SSB 0  
 LB 0.10 Hz  
 GB 0  
 PC 4.00

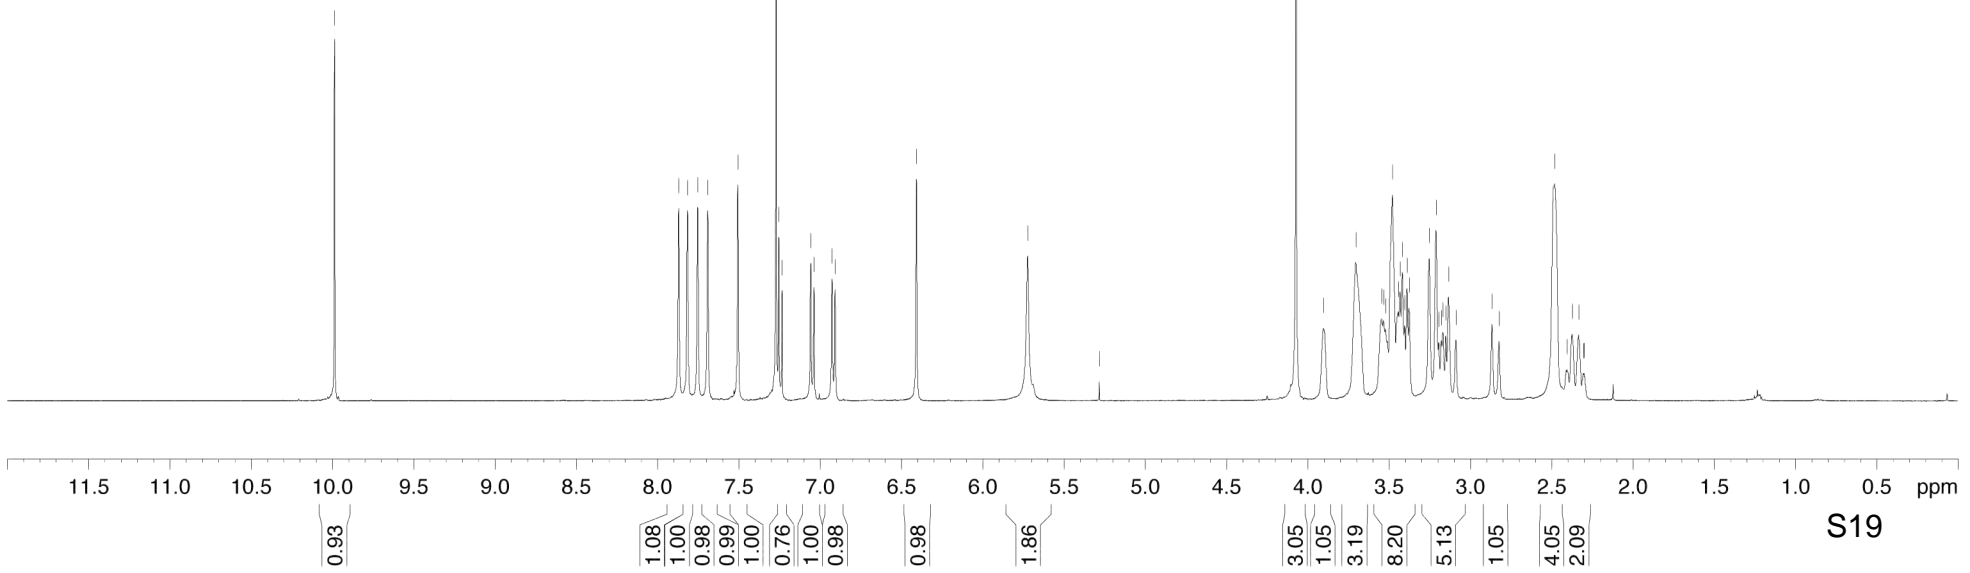

NAME TW1059a  
 EXPNO 2  
 PROCNO 1  
 Date\_ 20130327  
 Time 7.27  
 INSTRUM spect  
 PROBHD 5 mm PABBO BB/  
 PULPROG zgdc30  
 TD 48074  
 SOLVENT CDCl3  
 NS 2048  
 DS 4  
 SWH 24038.461 Hz  
 FIDRES 0.500030 Hz  
 AQ 0.9999892 sec  
 RG 57  
 DW 20.800 usec  
 DE 6.00 usec  
 TE 295.9 K  
 D1 0.00100000 sec  
 D11 0.03000000 sec  
 TD0 1

195.858

162.065  
 161.668  
 161.637  
 161.488  
 160.165  
 155.022  
 149.413  
 144.600  
 141.601  
 141.580  
 141.411  
 139.262  
 136.557  
 136.340  
 136.072  
 135.937  
 135.903  
 133.773  
 131.905  
 131.724  
 131.381  
 131.257  
 128.648  
 128.552  
 125.893  
 124.191  
 118.748  
 106.940

77.477  
 77.161  
 76.842

56.222  
 38.563  
 38.405  
 38.367  
 38.227  
 38.172  
 37.906  
 36.333  
 36.135  
 36.106  
 36.048  
 35.882  
 34.459  
 29.044  
 28.911  
 28.855

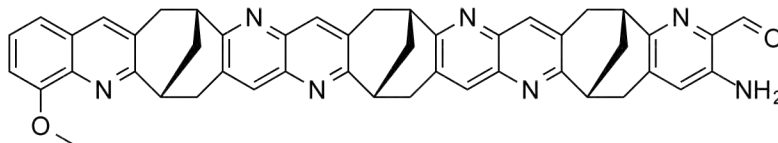

Compound 15

===== CHANNEL f1 =====

NUC1 13C  
 P1 8.50 usec  
 PL1 -3.00 dB  
 PL1W 58.63890457 W  
 SFO1 100.6228298 MHz

===== CHANNEL f2 =====

CPDPRG2 waltz16  
 NUC2 1H  
 PCPD2 80.00 usec  
 PL2 -4.00 dB  
 PL12 14.06 dB  
 PL2W 21.45254898 W  
 PL12W 0.33533499 W  
 SFO2 400.1316005 MHz  
 SI 32768  
 SF 100.6127602 MHz

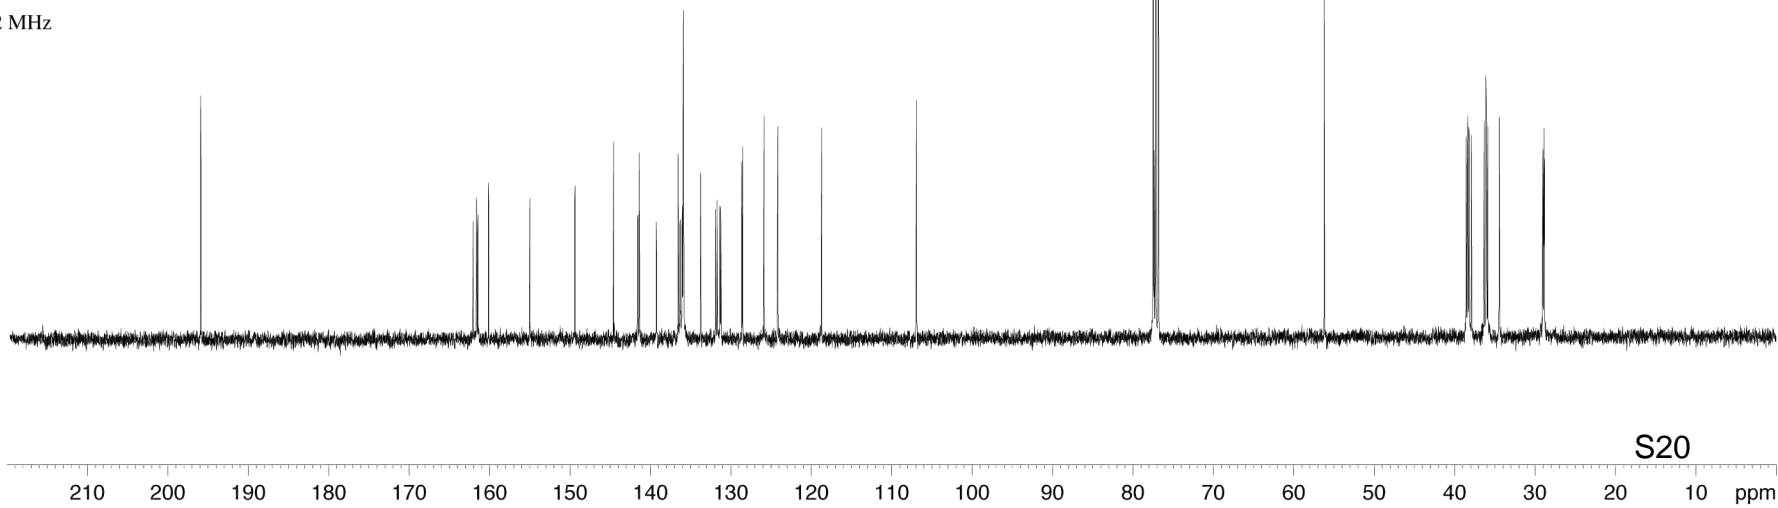

NAME TW1063a  
 EXPNO 1  
 PROCNO 1  
 Date\_ 20130411  
 Time 17.24  
 INSTRUM spect  
 PROBHD 5 mm PABBO BB/  
 PULPROG zg30  
 TD 57690  
 SOLVENT CDCl3  
 NS 32  
 DS 2  
 SWH 7211.539 Hz  
 FIDRES 0.125005 Hz  
 AQ 3.9998901 sec  
 RG 128  
 DW 69.333 usec  
 DE 6.00 usec  
 TE 294.1 K  
 D1 0.00100000 sec  
 TD0 1

===== CHANNEL f1 =====  
 NUC1 1H  
 P1 9.10 usec  
 PL1 -5.00 dB  
 PL1W 27.00716019 W  
 SFO1 400.1334011 MHz  
 SI 131072  
 SF 400.1300057 MHz  
 WDW EM  
 SSB 0  
 LB 0.30 Hz  
 GB 0  
 PC 4.00

9.980

Compound 15  
 Compound 16

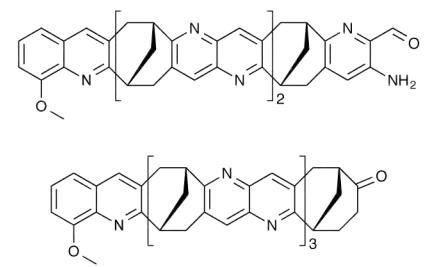

Compound 16 with approximately 13% of compound 15 present.

8.031 7.865 7.798 7.745 7.729 7.687 7.673 7.526 7.507 7.366 7.346 7.327 7.270 7.257 7.247 7.238 7.229 7.061 6.959 6.941 6.925 6.906 6.423 4.082 4.069 3.900 3.761 3.756 3.683 3.555 3.542 3.515 3.501 3.474 3.421 3.408 3.376 3.362 3.327 3.285 3.186 3.145 3.101 3.059 3.049 3.016 2.514 2.477 2.335 2.301 2.205 2.198 2.177 1.921 1.897 1.882 1.869 1.861 1.831

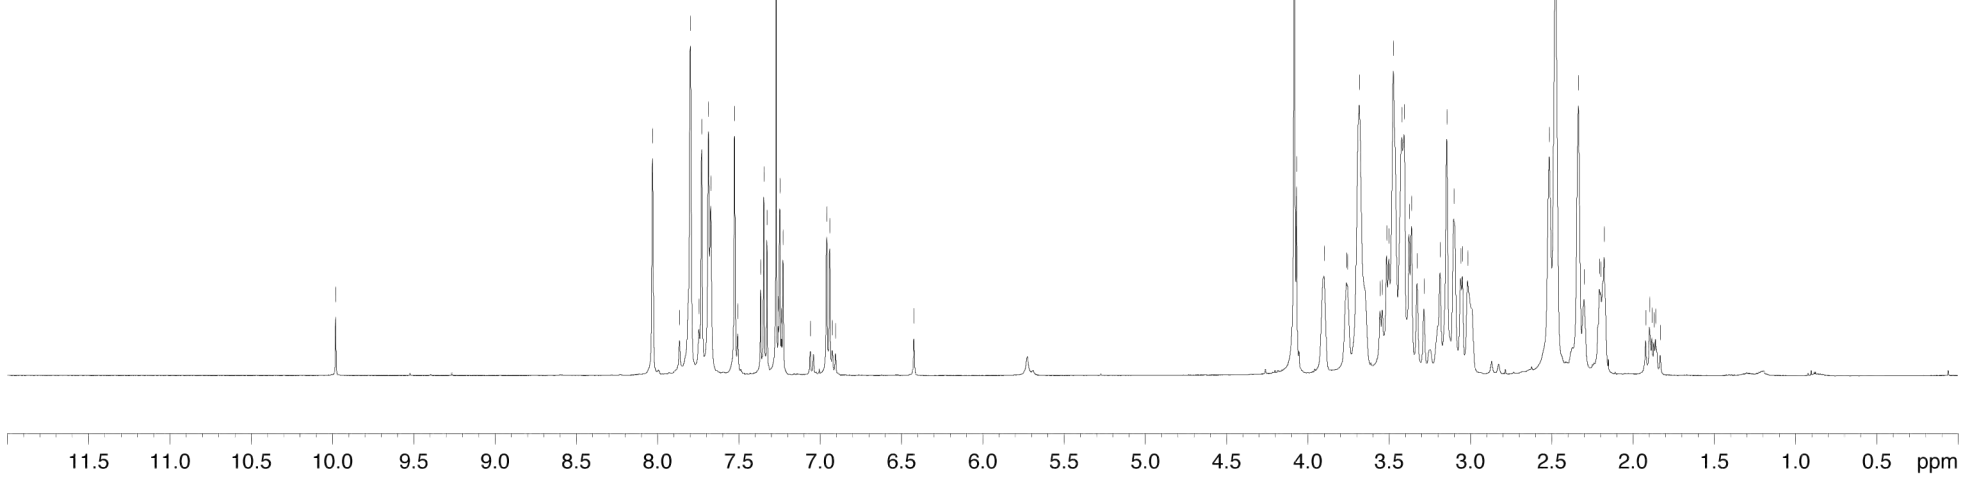

0.13

1.00  
 2.22  
 1.07  
 2.14  
 1.00  
 1.02  
 1.09  
 1.01

0.14

3.80  
 1.37  
 1.43  
 4.85  
 12.47  
 7.25

7.38  
 3.53  
 2.09  
 1.05

NAME TW1063a  
 EXPNO 2  
 PROCNO 1  
 Date\_ 20130412  
 Time 2.00  
 INSTRUM spect  
 PROBHD 5 mm PABBO BB/  
 PULPROG zgdc30  
 TD 48074  
 SOLVENT CDCl3  
 NS 4096  
 DS 4  
 SWH 24038.461 Hz  
 FIDRES 0.500030 Hz  
 AQ 0.9999892 sec  
 RG 57  
 DW 20.800 usec  
 DE 6.00 usec  
 TE 296.0 K  
 D1 0.00100000 sec  
 D11 0.03000000 sec  
 TD0 1

212.843

161.995  
 161.674  
 161.467  
 161.362  
 160.485  
 160.019  
 154.933  
 141.739  
 141.614  
 141.595  
 141.555  
 141.506  
 141.386  
 139.261  
 136.054  
 135.905  
 135.436  
 131.906  
 131.755  
 131.432  
 131.379  
 131.298  
 131.110  
 128.612  
 128.542  
 128.474  
 126.072  
 119.090  
 107.031

77.482  
 77.164  
 76.846

56.226  
 44.408  
 38.613  
 38.485  
 38.429  
 38.398  
 38.227  
 36.856  
 36.339  
 36.261  
 36.170  
 36.121  
 36.057  
 33.924  
 31.947  
 31.349  
 28.934  
 28.882

Compound 15  
 Compound 16

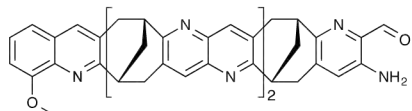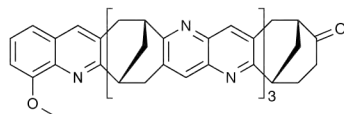

Compound 16 with  
 approximately 13% of compound  
 15 present.

===== CHANNEL f1 =====  
 NUC1 13C  
 P1 8.00 usec  
 PL1 -4.00 dB  
 PL1W 73.82200623 W  
 SFO1 100.6228298 MHz

===== CHANNEL f2 =====  
 CPDPRG2 waltz16  
 NUC2 1H  
 PCPD2 80.00 usec  
 PL2 -5.00 dB  
 PL12 13.88 dB  
 PL2W 27.00716019 W  
 PL12W 0.34952554 W  
 SFO2 400.1316005 MHz  
 SI 262144  
 SF 100.6127612 MHz

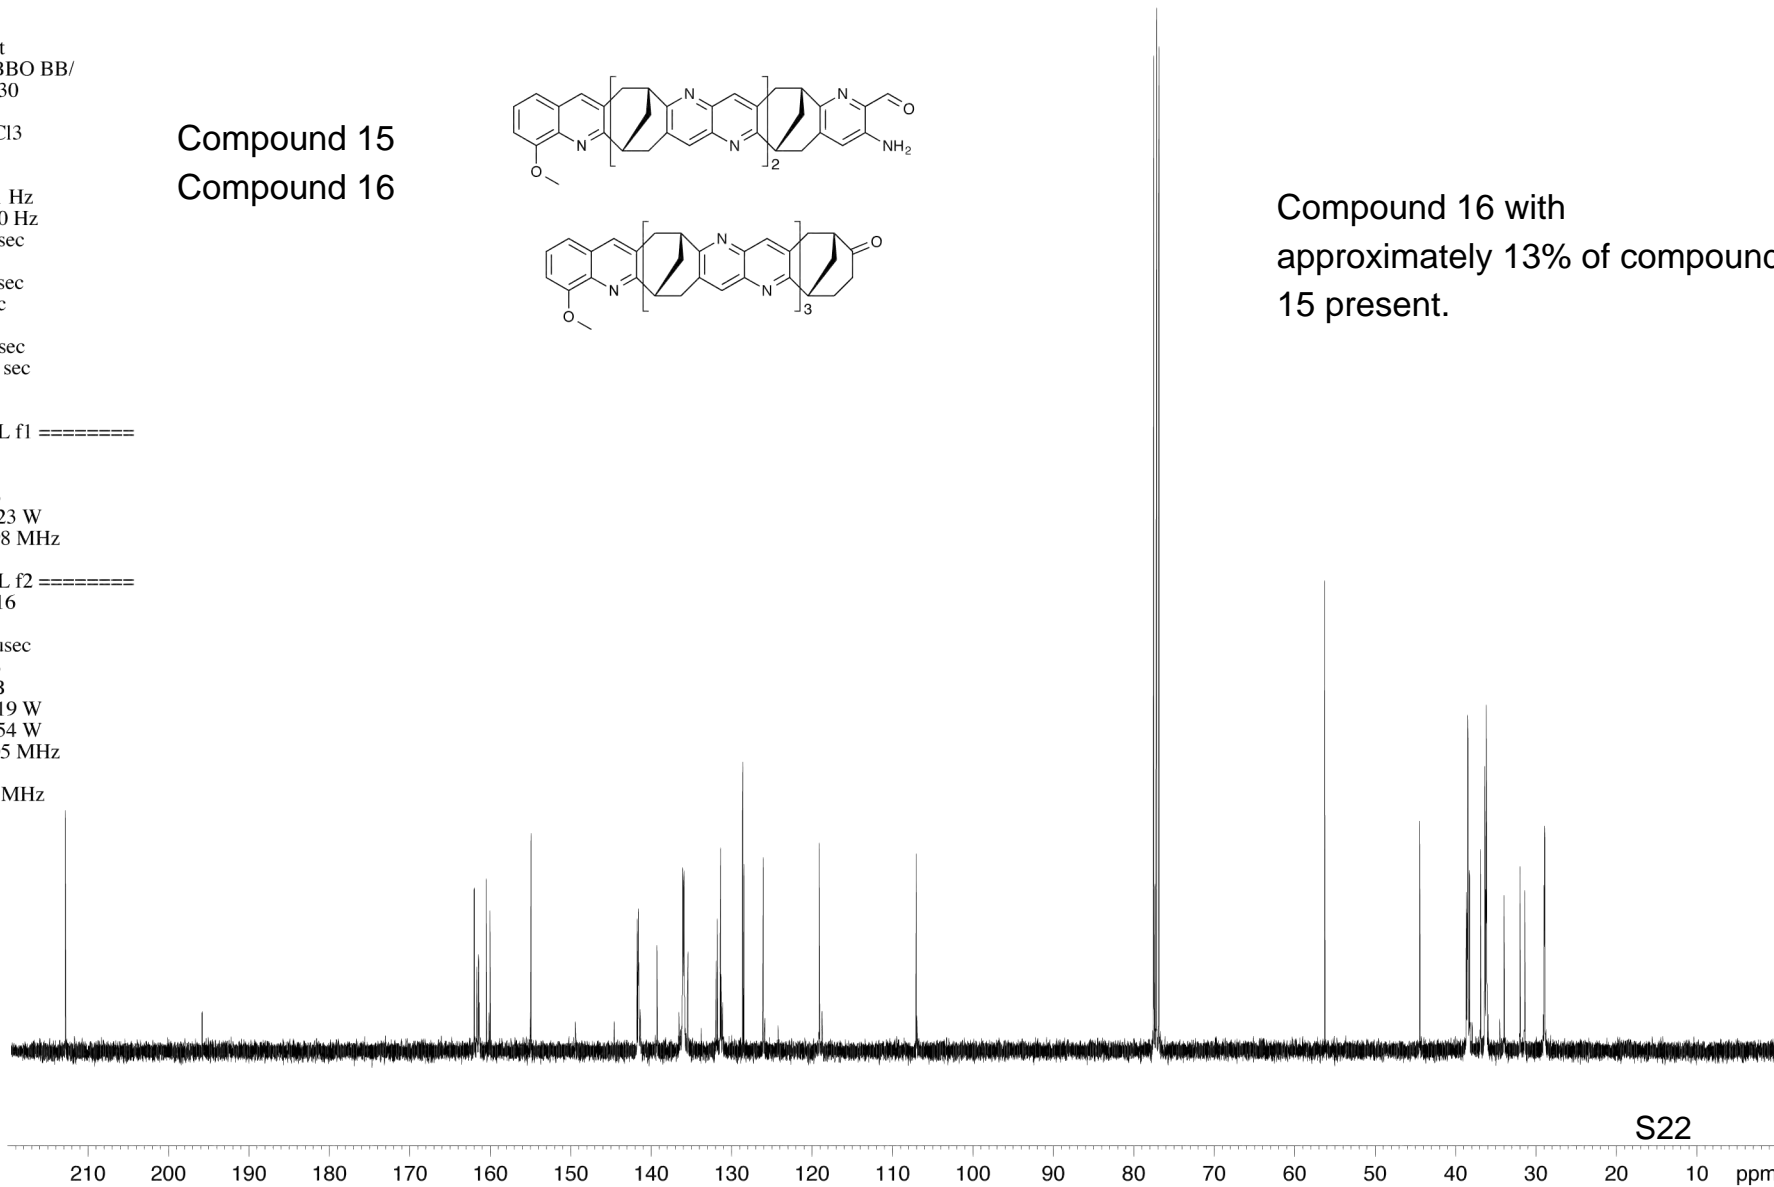

Compound 2 as a mixture of  
2•TFA and 2•(TFA)<sub>2</sub>

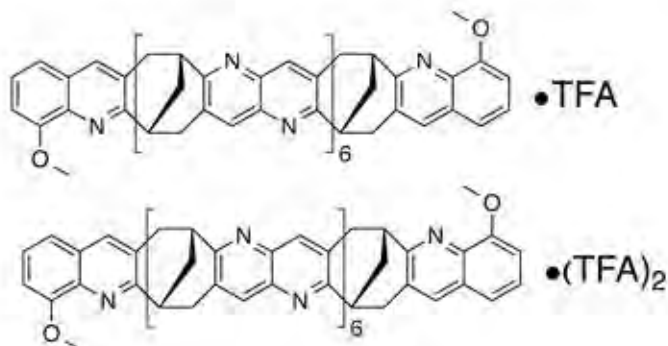

```

NAME          TW1103
EXPNO         3
PROCNO        1
Date_         20130528
Time_         18.45
INSTRUM       spect
PROBHD        5 mm PABBO BB/
PULPROG       zgfgqn
TD            131072
SOLVENT       CDC13+MeOD
NS            128
DS            4
SWH           89285.711 Hz
FIDRES        0.681196 Hz
AQ            0.7340532 sec
RG            1820
DW            5.600 usec
DE            6.50 usec
TE            294.9 K
D1            1.00000000 sec
TD0           1
  
```

```

===== CHANNEL f1 =====
NUC1          19F
P1            10.60 usec
PL1           -5.00 dB
PL1W          25.25963783 W
SFO1          376.4607164 MHz
SI            65536
SF            376.4983660 MHz
WDW           EM
SSB           0
LB            0.30 Hz
GB            0
PC            1.00
  
```

-66 -68 -70 -72 -74 -76 -78 -80 -82 -84 -86 -88 ppm

0.09  
1.00

NAME TW1163b  
 EXPNO 6  
 PROCNO 1  
 Date\_ 20131103  
 Time 7.05  
 INSTRUM spect  
 PROBHD 5 mm PABBO BB/  
 PULPROG zg30  
 TD 57690  
 SOLVENT CDCl3+MeOD  
 NS 256  
 DS 2  
 SWH 7211.539 Hz  
 FIDRES 0.125005 Hz  
 AQ 3.9998901 sec  
 RG 322  
 DW 69.333 usec  
 DE 6.00 usec  
 TE 294.5 K  
 D1 0.00100000 sec  
 TD0 1

===== CHANNEL f1 =====  
 NUC1 1H  
 P1 9.10 usec  
 PL1 -5.00 dB  
 PL1W 27.00716019 W  
 SFO1 400.1334011 MHz  
 SI 131072  
 SF 400.1300214 MHz  
 WDW EM  
 SSB 0  
 LB 0.30 Hz  
 GB 0  
 PC 4.00

7.834  
 7.818  
 7.726  
 7.704  
 7.676  
 7.370  
 7.350  
 7.330  
 7.270  
 7.255  
 7.253  
 7.235  
 6.963  
 6.945

4.061  
 3.902  
 3.725  
 3.655  
 3.648  
 3.555  
 3.542  
 3.513  
 3.499  
 3.471  
 3.452  
 3.401  
 3.354  
 3.324  
 3.320  
 3.316  
 3.312  
 3.308  
 3.222  
 3.204  
 3.180  
 3.163  
 3.138  
 3.095  
 3.052  
 2.495  
 2.463

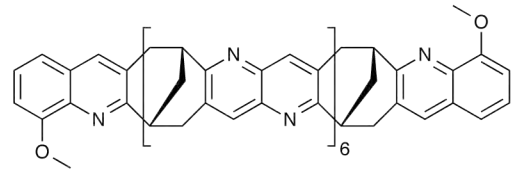

Compound 2

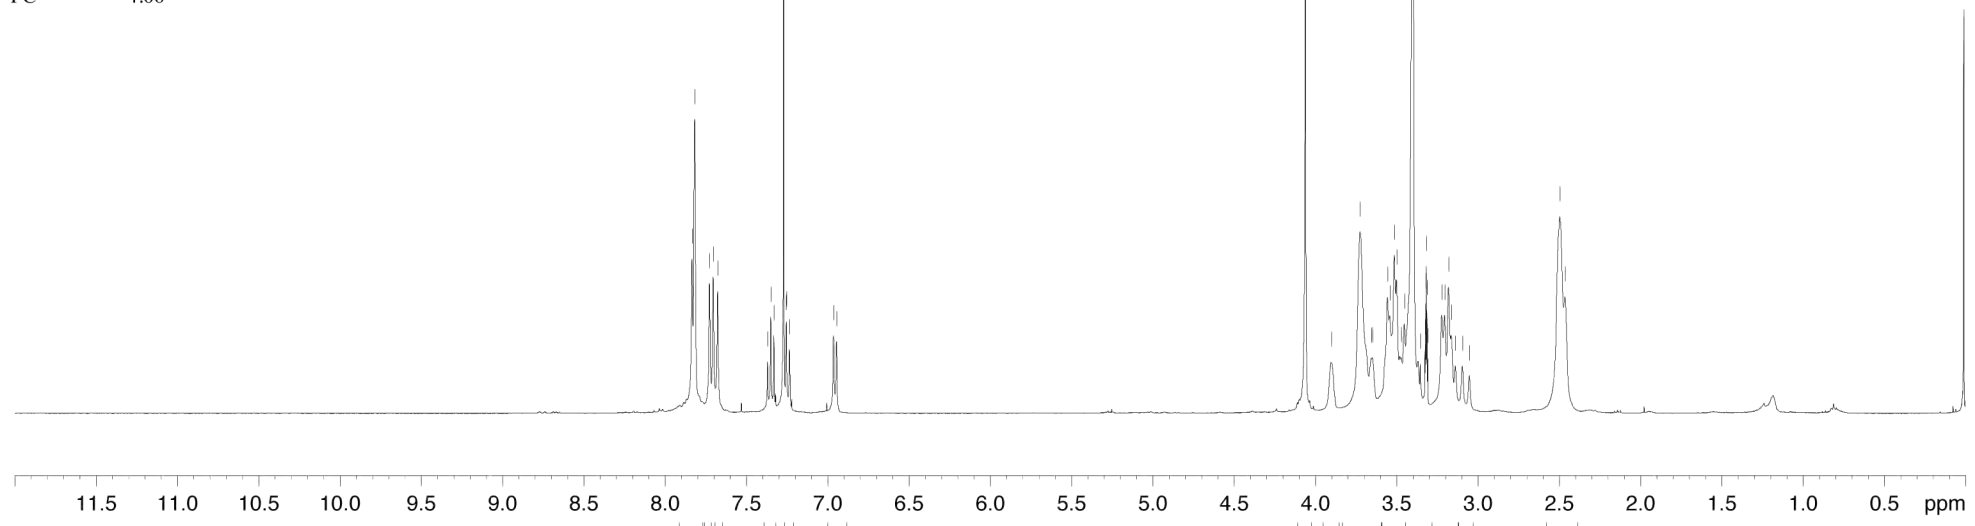

8.19  
 2.03  
 1.92  
 1.90  
 2.06  
 1.83  
 1.97

6.11  
 2.33  
 13.87  
 13.92  
 10.03  
 2.10  
 14.00



NAME TW1106  
 EXPNO 1  
 PROCNO 1  
 Date\_ 20130528  
 Time 15.32  
 INSTRUM spect  
 PROBHD 5 mm PABBO BB/  
 PULPROG zg30  
 TD 57690  
 SOLVENT CDCl3+MeOD  
 NS 128  
 DS 2  
 SWH 7211.539 Hz  
 FIDRES 0.125005 Hz  
 AQ 3.9998901 sec  
 RG 256  
 DW 69.333 usec  
 DE 6.00 usec  
 TE 294.9 K  
 D1 0.00100000 sec  
 TD0 1

===== CHANNEL f1 =====  
 NUC1 1H  
 P1 9.10 usec  
 PL1 -5.00 dB  
 PL1W 27.00716019 W  
 SFO1 400.1334011 MHz  
 SI 131072  
 SF 400.1300213 MHz  
 WDW EM  
 SSB 0  
 LB 0.30 Hz  
 GB 0  
 PC 4.00

8.657  
 8.557  
 8.434  
 8.366  
 8.326  
 8.296  
 7.750  
 7.730  
 7.710  
 7.658  
 7.637  
 7.370  
 7.350  
 7.270

4.561  
 4.250  
 4.205  
 4.134  
 4.075  
 4.013  
 3.760  
 3.745  
 3.700  
 3.668  
 3.655  
 3.623  
 3.610  
 3.577  
 3.564  
 3.531  
 3.487  
 3.449  
 3.416  
 3.378  
 3.374  
 3.370  
 3.366  
 3.362  
 3.353  
 3.308  
 3.255  
 3.211  
 2.648

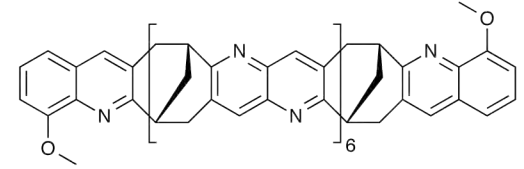

Compound 2 with TFA added to the NMR-sample.

from TFA

11.5 11.0 10.5 10.0 9.5 9.0 8.5 8.0 7.5 7.0 6.5 6.0 5.5 5.0 4.5 4.0 3.5 3.0 2.5 2.0 1.5 1.0 0.5 ppm

2.00  
 2.19  
 2.02  
 2.12  
 3.93  
 1.96  
 2.01  
 2.01  
 2.07

1.95  
 2.13  
 2.96  
 9.77  
 2.28  
 2.21  
 24.35  
 4.24  
 14.17

NAME TW1112  
 EXPNO 3  
 PROCNO 1  
 Date\_ 20130614  
 Time 23.36  
 INSTRUM spect  
 PROBHD 5 mm PABBO BB/  
 PULPROG zgdc30  
 TD 48074  
 SOLVENT CDCl3+MeOD  
 NS 12000  
 DS 4  
 SWH 24038.461 Hz  
 FIDRES 0.500030 Hz  
 AQ 0.9999892 sec  
 RG 57  
 DW 20.800 usec  
 DE 6.00 usec  
 TE 295.8 K  
 D1 0.00100000 sec  
 D11 0.03000000 sec  
 TD0 1

162.316  
 161.834  
 161.797  
 161.491  
 159.953  
 154.628  
 141.345  
 141.333  
 141.301  
 141.207  
 141.171  
 138.976  
 136.248  
 136.102  
 136.040  
 135.764  
 135.683  
 132.378  
 131.575  
 131.435  
 131.356  
 131.248  
 128.566  
 126.195  
 118.987  
 107.084

77.478  
 77.160  
 76.840

38.462  
 38.154  
 37.921  
 37.875  
 36.111  
 35.864  
 35.828  
 35.731  
 35.485  
 28.793  
 28.510  
 28.320

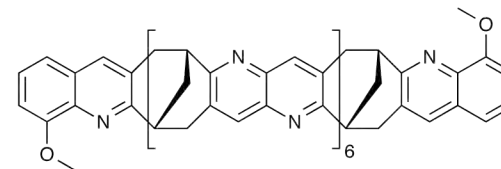

Compound 2

===== CHANNEL f1 =====

NUC1 13C  
 P1 8.00 usec  
 PL1 -4.00 dB  
 PL1W 73.82200623 W  
 SFO1 100.6228298 MHz

===== CHANNEL f2 =====

CPDPRG2 waltz16  
 NUC2 1H  
 PCPD2 80.00 usec  
 PL2 -5.00 dB  
 PL12 13.88 dB  
 PL2W 27.00716019 W  
 PL12W 0.34952554 W  
 SFO2 400.1316005 MHz  
 SI 32768  
 SF 100.6127670 MHz

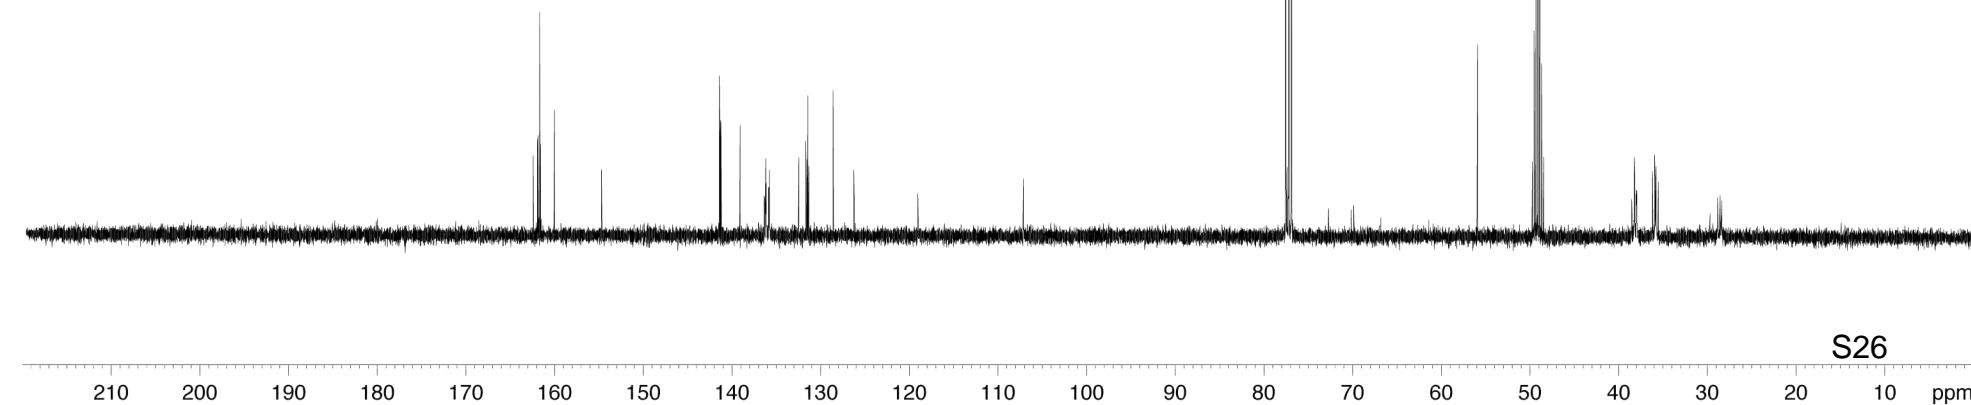

NAME TW1163b  
 EXPNO 7  
 PROCNO 1  
 Date\_ 20131103  
 Time 16.48  
 INSTRUM spect  
 PROBHD 5 mm PABBO BB/  
 PULPROG zgdc30  
 TD 48074  
 SOLVENT CDCl3+MeOD  
 NS 32768  
 DS 4  
 SWH 24038.461 Hz  
 FIDRES 0.500030 Hz  
 AQ 0.9999892 sec  
 RG 57  
 DW 20.800 usec  
 DE 6.00 usec  
 TE 296.0 K  
 D1 0.00100000 sec  
 D11 0.03000000 sec  
 TD0 1

===== CHANNEL f1 =====  
 NUC1 13C  
 P1 8.00 usec  
 PL1 -4.00 dB  
 PL1W 73.82200623 W  
 SFO1 100.6228298 MHz

===== CHANNEL f2 =====  
 CPDPRG2 waltz16  
 NUC2 1H  
 PCPD2 80.00 usec  
 PL2 -5.00 dB  
 PL12 13.88 dB  
 PL2W 27.00716019 W  
 PL12W 0.34952554 W  
 SFO2 400.1316005 MHz  
 SI 262144  
 SF 100.6127663 MHz

162.314  
 161.861  
 161.817  
 161.639  
 161.508  
 159.968  
 154.608  
 141.373  
 141.313  
 141.238  
 141.187  
 138.912  
 136.356  
 136.154  
 136.087  
 135.781  
 135.691  
 132.375  
 131.589  
 131.446  
 131.376  
 131.352  
 131.246  
 128.614  
 128.584  
 126.252  
 119.009  
 107.153

77.480  
 77.161  
 76.843

55.936  
 49.780  
 49.566  
 49.353  
 49.139  
 48.925  
 48.712  
 48.498  
 38.486  
 38.184  
 37.928  
 36.132  
 35.901  
 35.843  
 35.745  
 35.479  
 28.798  
 28.530  
 28.393  
 28.331

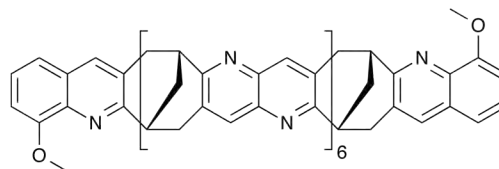

Compound 2  
 13C data in the paper is a  
 combination of this and the  
 previous 13C spectra

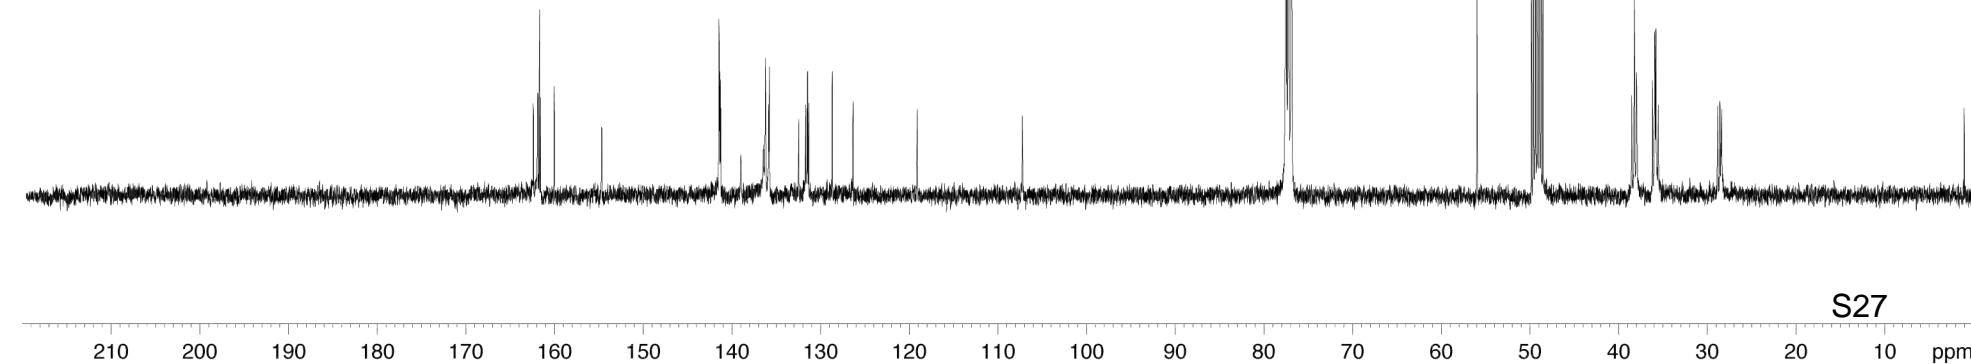

## NMR Titrations

$[H]_0$  is the concentration of the host and it remains constant during the titration.

$[G]_0$  is the concentration of the stock solution of the guest.

The guest solution is prepared in the host solution. This solution is then added in portions ( $V_{\text{add}}$ ) to the NMR sample. This solution also serves as the final data-point in each measurement. Noted as “Max conc.” in the tables below.

$[G]$  is the concentration of the guest in the NMR sample in each measurement.

$$\Delta\delta = \delta_{\text{obs}} - \delta_0$$

$\delta_{\text{obs}}$  is the observed chemical shift of the host for each measurement in the presence of guest.

$\delta_0$  is the observed chemical shift of the host without any guest present.

$\Delta\delta_{\text{calc}}$  is fitted to  $\Delta\delta$  according to Eq. 1. using Kaleidagraph.

$$\Delta\delta_{\text{calc}} = \frac{\Delta\delta_{\text{max}}}{[H]_0} \left( \left( \frac{1}{2} [H]_0 + [G]_0 + \frac{1}{K_a} \right) - \sqrt{\frac{1}{4} \left( [H]_0 + [G]_0 + \frac{1}{K_a} \right)^2 - [H]_0 [G]_0} \right) \quad \text{Eq. 1}$$

$\Delta\delta_{\text{max}} = \delta_0 - \delta_{\text{max}}$ ;  $\delta_{\text{max}}$  is the chemical shift at 100% complexation.

$V_{\text{add}}$  and  $V_{\text{tot}}$  is the added volume of guest and the total volume in the NMR sample respectively.

The resonance used in the fit is from the proton shown in the structures below.

Solvent: MeOH-*d*<sub>4</sub> 10%v/v in CDCl<sub>3</sub>

Host: **1** [H]<sub>0</sub>: 0.8 mM

Guest: GndBPh<sub>4</sub> [G]<sub>0</sub>: 68.5 mM

Initial Volume: 0.50 mL

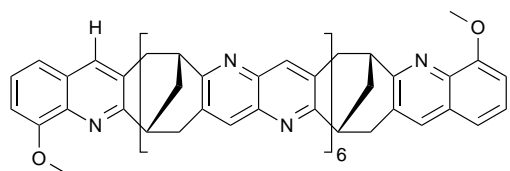

| V <sub>add</sub> (mL) | V <sub>tot</sub> (mL) | [G] / M | Δδ     | Δδ <sub>calc</sub> | [HG]/[H] <sub>0</sub> |
|-----------------------|-----------------------|---------|--------|--------------------|-----------------------|
| 0                     | 0.5                   | 0.000   | 0.000  | 0.000              | 0.0                   |
| 0.02                  | 0.52                  | 0.003   | -0.002 | -0.002             | 1.2                   |
| 0.03                  | 0.55                  | 0.006   | -0.004 | -0.004             | 2.7                   |
| 0.05                  | 0.6                   | 0.011   | -0.007 | -0.007             | 4.9                   |
| 0.07                  | 0.67                  | 0.017   | -0.011 | -0.010             | 7.2                   |
| 0.1                   | 0.77                  | 0.024   | -0.014 | -0.014             | 9.7                   |
| 0.15                  | 0.92                  | 0.031   | -0.017 | -0.018             | 12.3                  |
| 0.25                  | 1.17                  | 0.039   | -0.022 | -0.022             | 15.0                  |
| 0.4                   | 1.57                  | 0.047   | -0.025 | -0.025             | 17.3                  |
|                       | Max.                  | 0.069   | -0.034 | -0.034             | 23.5                  |

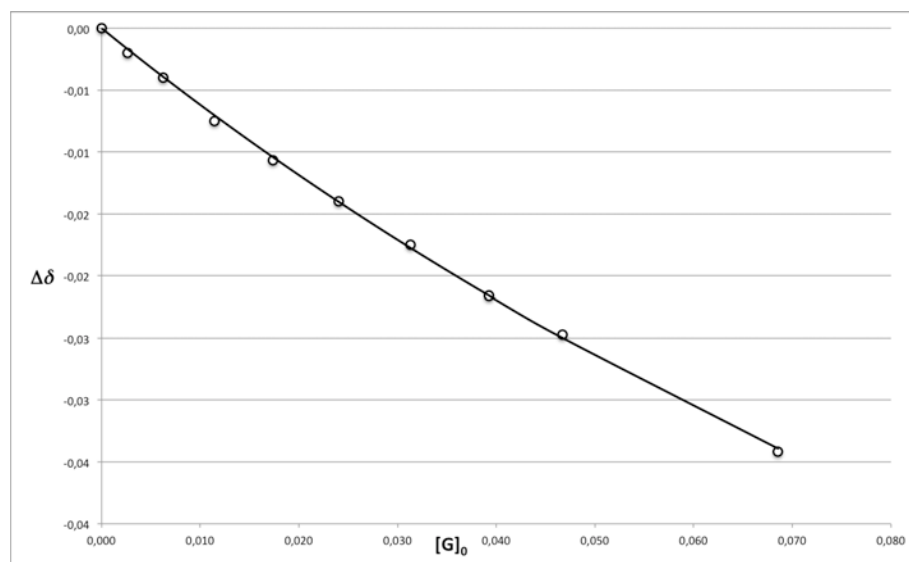

$K_a$ :  $5.0 \pm 0.5 \text{ M}^{-1}$

$\Delta\delta_{\text{max}}$ : -0.13

$R^2 = 0.999$

Solvent: MeOH-*d*<sub>4</sub> 10%v/v in CDCl<sub>3</sub>

Host: **16**

[H]<sub>0</sub>: 1.1 mM

Guest: GndBPh<sub>4</sub>

[G]<sub>0</sub>: 63.4 mM

Initial Volume: 0.50 mL

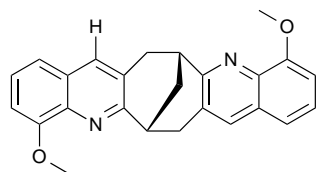

| V <sub>add</sub> (mL) | V <sub>tot</sub> (mL) | [G] / M | Δδ     | Δδ <sub>calc</sub> | [HG]/[H] <sub>0</sub> |
|-----------------------|-----------------------|---------|--------|--------------------|-----------------------|
| 0                     | 0.5                   | 0.000   | 0.000  | 0.000              | 0.0                   |
| 0.02                  | 0.52                  | 0.002   | -0.001 | -0.001             | 2.0                   |
| 0.03                  | 0.55                  | 0.006   | -0.003 | -0.002             | 4.6                   |
| 0.05                  | 0.6                   | 0.011   | -0.004 | -0.004             | 8.1                   |
| 0.07                  | 0.67                  | 0.016   | -0.006 | -0.006             | 11.8                  |
| 0.1                   | 0.77                  | 0.022   | -0.008 | -0.008             | 15.6                  |
| 0.15                  | 0.92                  | 0.029   | -0.009 | -0.009             | 19.3                  |
| 0.25                  | 1.17                  | 0.036   | -0.010 | -0.011             | 23.1                  |
|                       | Max conc.             | 0.063   | -0.017 | -0.017             | 34.4                  |

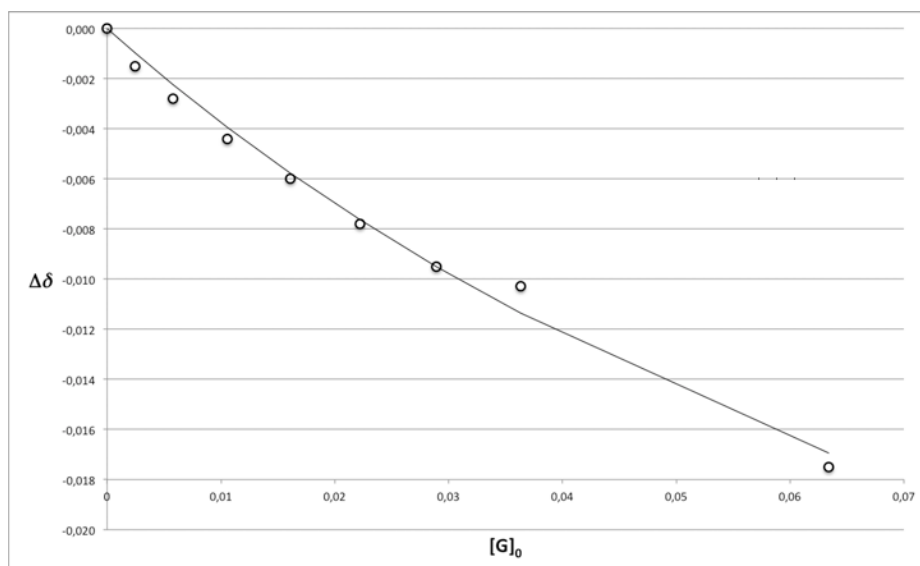

$K_a$ :  $8.1 \pm 2.2 \text{ M}^{-1}$

$\Delta\delta_{\text{max}}$ : -0.05

$R^2 = 0.991$

Solvent: MeOH-*d*<sub>4</sub> 10%v/v in CDCl<sub>3</sub>

Host: 8-Methoxyquinoline [H]<sub>0</sub>: 0.8 mM

Guest: GndBPh<sub>4</sub> [G]<sub>0</sub>: 61.8 mM

Initial Volume: 0.50 mL

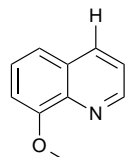

| V <sub>add</sub> (mL) | V <sub>tot</sub> (mL) | [G] / M | Δδ     | Δδ <sub>calc</sub> | [HG]/[H] <sub>0</sub> |
|-----------------------|-----------------------|---------|--------|--------------------|-----------------------|
| 0                     | 0.5                   | 0.000   | 0.000  | 0.000              | 0.0                   |
| 0.02                  | 0.52                  | 0.002   | -0.001 | -0.001             | 3.5                   |
| 0.03                  | 0.55                  | 0.006   | -0.003 | -0.003             | 7.9                   |
| 0.05                  | 0.6                   | 0.010   | -0.005 | -0.005             | 13.6                  |
| 0.07                  | 0.67                  | 0.016   | -0.007 | -0.008             | 19.3                  |
| 0.1                   | 0.77                  | 0.022   | -0.010 | -0.010             | 24.9                  |
| 0.15                  | 0.92                  | 0.028   | -0.012 | -0.012             | 30.1                  |
| 0.25                  | 1.17                  | 0.035   | -0.014 | -0.014             | 35.1                  |
| 0.4                   | 1.57                  | 0.042   | -0.016 | -0.016             | 39.2                  |
|                       | Max                   | 0.062   | -0.019 | -0.019             | 48.6                  |

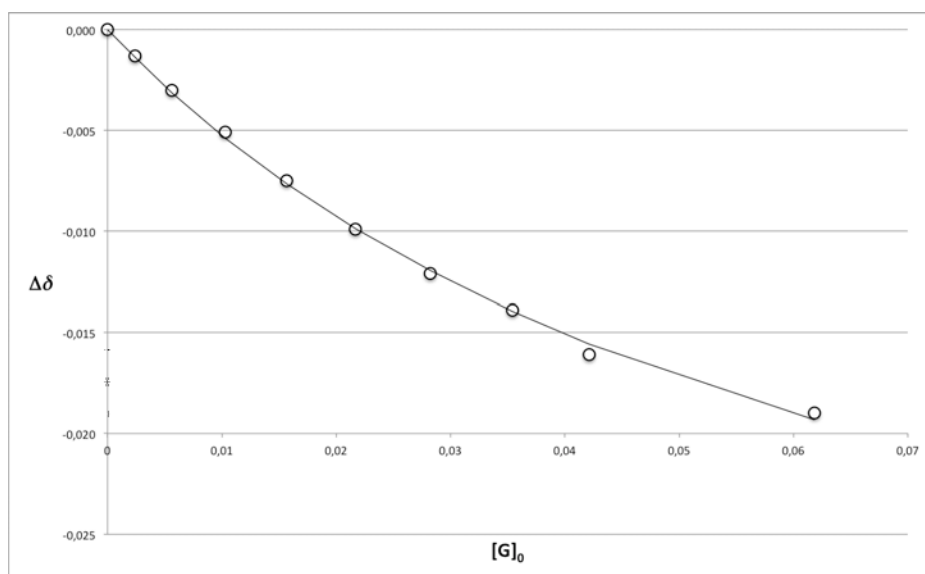

$K_a$ :  $15.6 \pm 1.2 M^{-1}$

$\Delta\delta_{\max}$ : -0.04

$R^2 = 0.998$

## S3 Molecular Dynamics Simulations

### *S3.1 Host-Guest Interactions*

#### S3.1.1 Initial Structures of Heptamer 2 - Guanidinium Complexes

The initial structures used as starting points for MD simulations (prepared as described in the Methods section of the article) are shown in Figure S1.

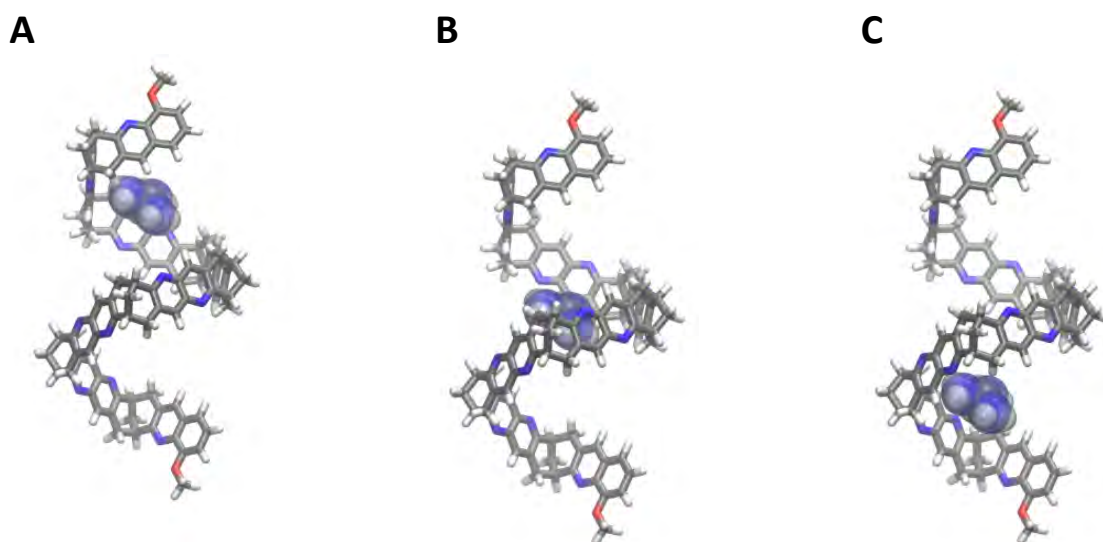

**Figure S1. Initial geometry of 2•Gnd complexes A, B and C used as starting points for 250 ns MD simulations.**



### S3.1.2 Heptamer 2 - Acetylcholine Interatomic Distances in MD Simulations

MD time series for the minimum distances between any atom in acetylcholine (ACh) and heptamer 2 are shown in Figure S2.

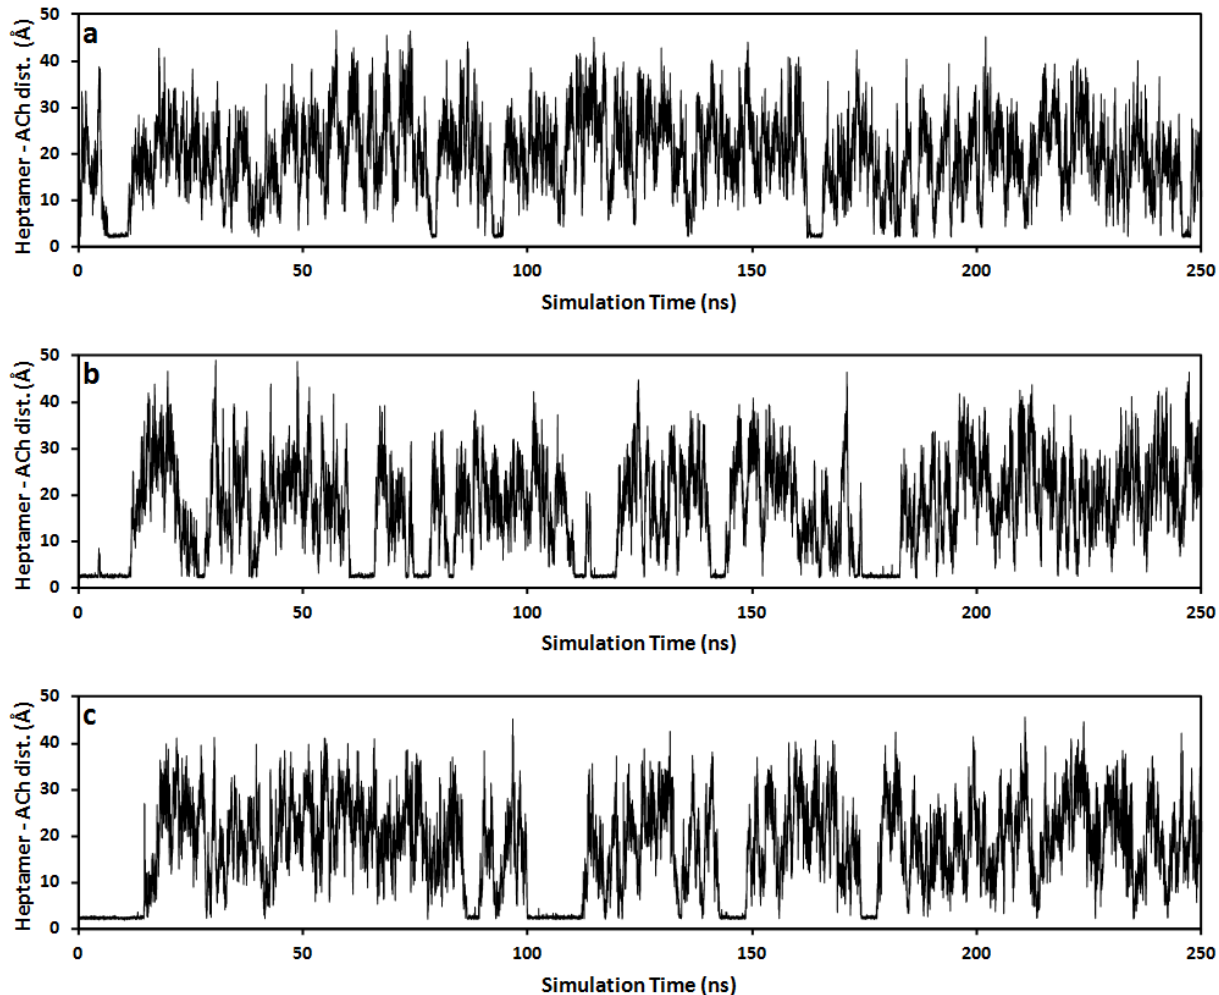

**Figure S2. Minimum distance between any atom in heptamer 2 and acetylcholine (ACh) during three 250 ns MD simulations.** Simulations were carried out in chloroform and started from different the geometries (A, B, C in Figure S1) corresponding to “top”, “middle” or “bottom” initial positioning of Ach along the heptamer axis.

### S3.1.3 Heptamer 2 - Guanidinium Interatomic Distances in MD Simulations

MD time series for the minimum distances between any atom in guanidinium (Gnd) and heptamer 2 are shown in Figure S3. Snapshots are shown in Figure S4 - Figure S6.

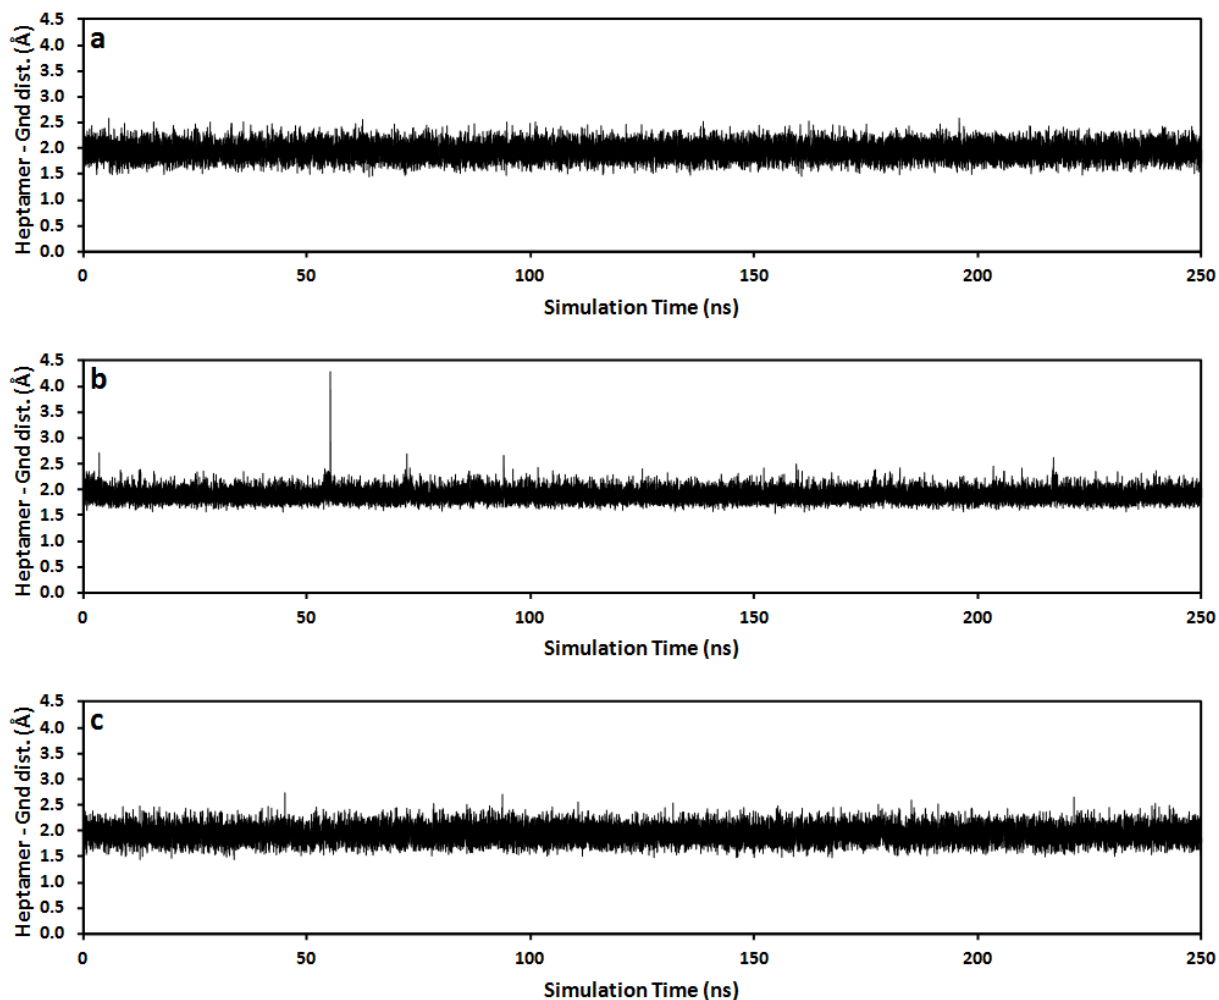

**Figure S3. Minimum distance between any atom in heptamer 2 and guanidinium (Gnd) during three 250 ns MD.** Simulations were carried out in chloroform started from different geometries (A, B, C), see Figure S1.

### S3.1.4. Snapshots from Heptamer 2 - Guanidinium Simulations

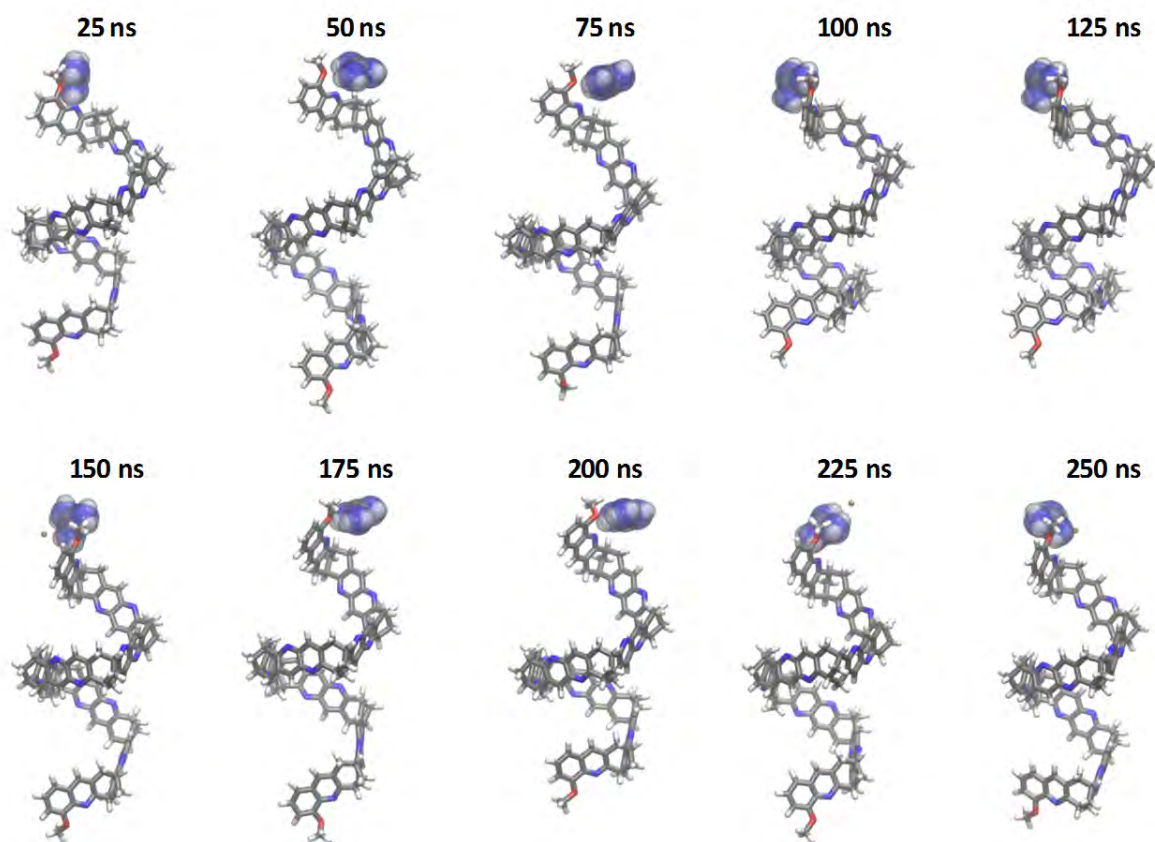

**Figure S4.** Snapshots extracted from the 250 ns MD simulation of heptamer 2 - guanidinium complex A.

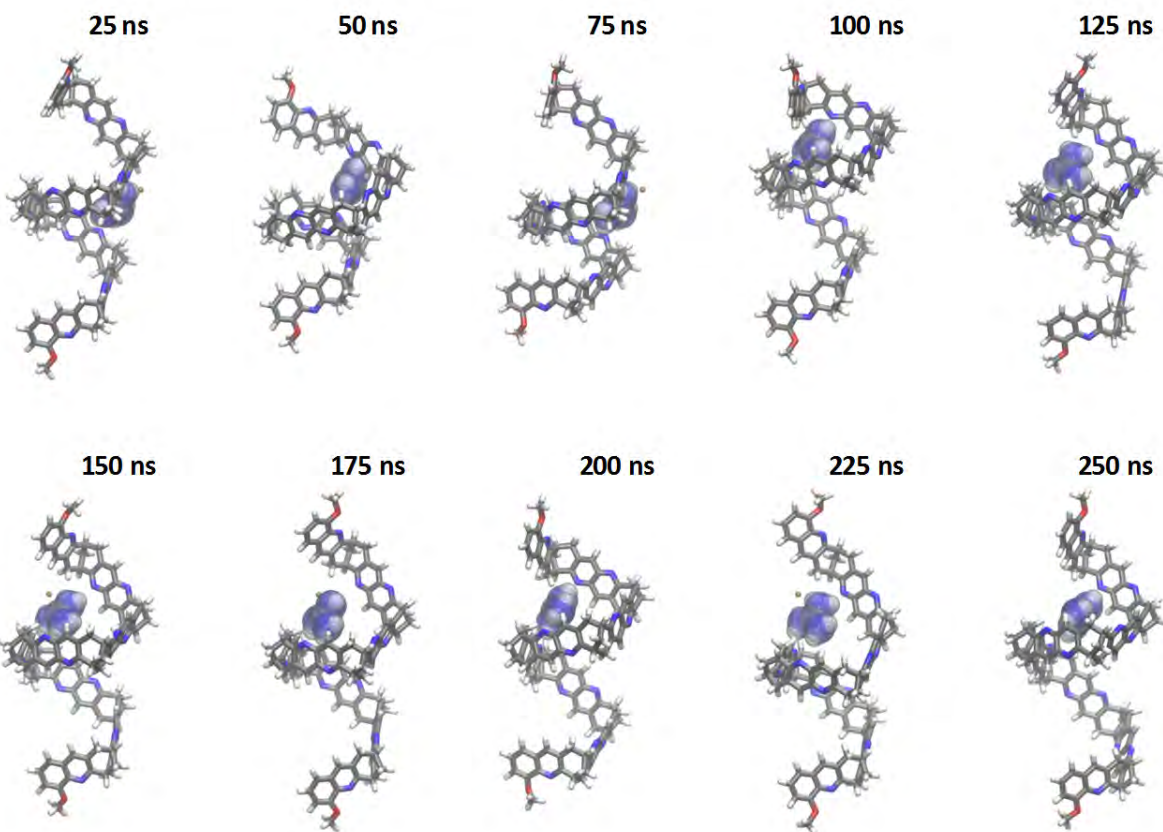

**Figure S5. Snapshots extracted from the 250 ns MD simulation of heptamer 2 - guanidinium complex B.**

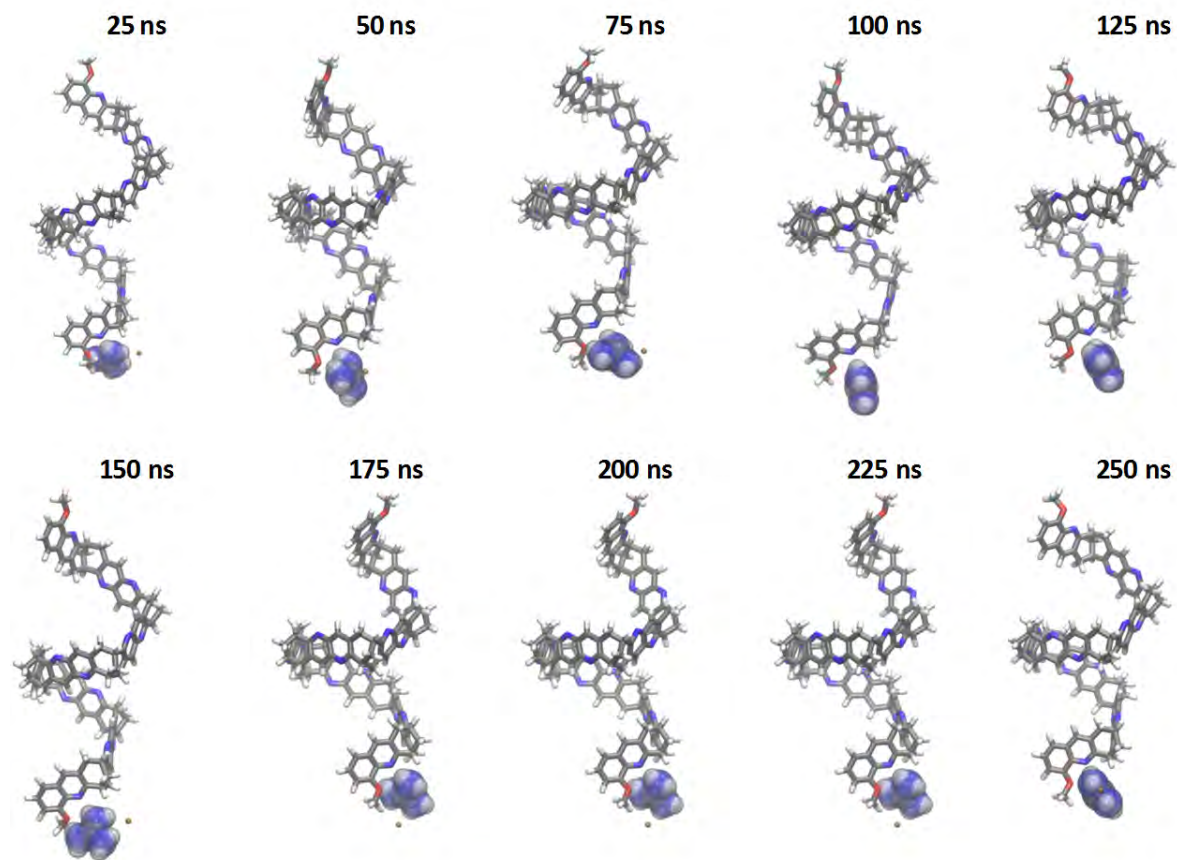

**Figure S6.** Snapshots extracted from the 250 ns MD simulation of heptamer 2 - guanidinium complex C.

### S3.1.5 MD Snapshot of Heptamer 2 - Guanidinium Bridging Interaction

In the MD simulation started with Gnd positioned near the middle of heptamer 2, i.e. geometry B (Figure S1b), Gnd occasionally bridged two 1,5-naphthyridine nitrogen atoms, which caused axial contraction of the heptamer, see Figure S7.

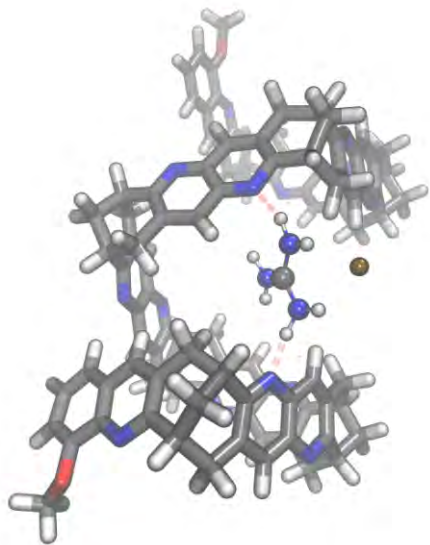

**Figure S7.** Snapshot from the MD simulation started from geometry B in Figure S1b, showing bridging of two 1,5-naphthyridine nitrogen atoms by guanidinium. The chloride counterion is shown as a yellow sphere.

## S3.2 MD Simulations of the Free Heptamer 2

### S3.2.1 Heptamer 2 MD Snapshots from 300 K and 400 K Simulations

Snapshots extracted at  $t = 0, 25, 50, 75$  and  $100$  ns are shown in Figure S8 for the 300 K (top panel) and 400 K (bottom panel) simulations of the free heptamer **2** in explicit chloroform.

The simulations at 400 K caused visible perturbations of the heptamer, such as the longitudinal compression seen in Figure S8 at  $t = 50$  ns. In contrast, the simulation at 300 K did not produce substantial perturbations. The structural conservation in this simulation was also evident from the high similarity between the averaged MD heptamer structure (Figure 4b) and the single OPLS\_2005 optimized heptamer structure (Figure 4a).

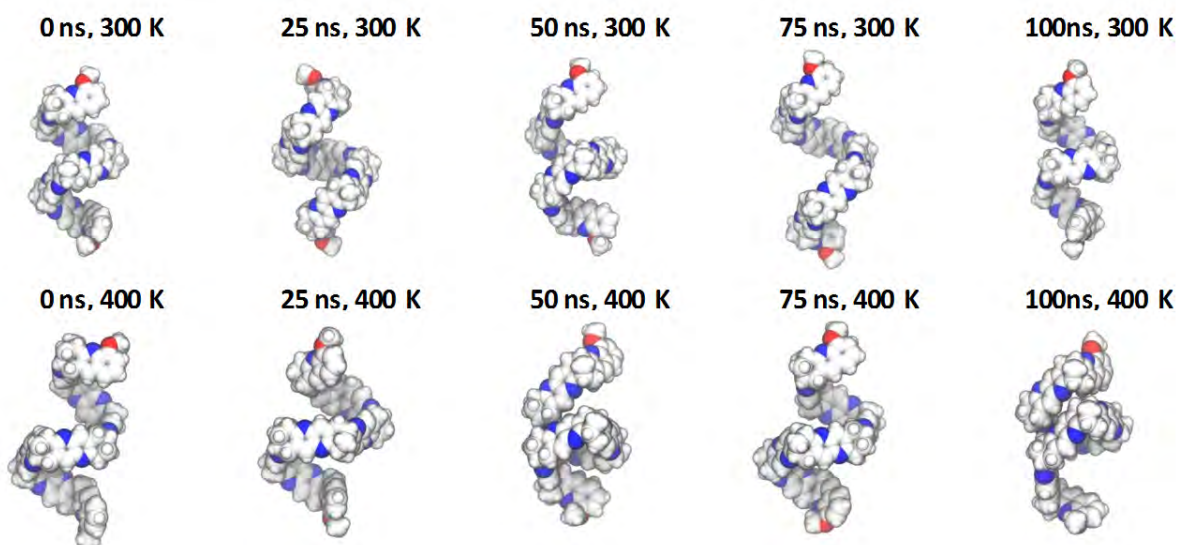

**Figure S8.** Snapshots from the isolated heptamer **2** simulations extracted at 25 ns intervals at 300 K (top panel) and 400 K (bottom panel).

## S4 Heptamer 2 Molecular Models

### S4.1 Heptamer 2 Molecular Model from B3LYP-D3/6-31G(d) Optimization

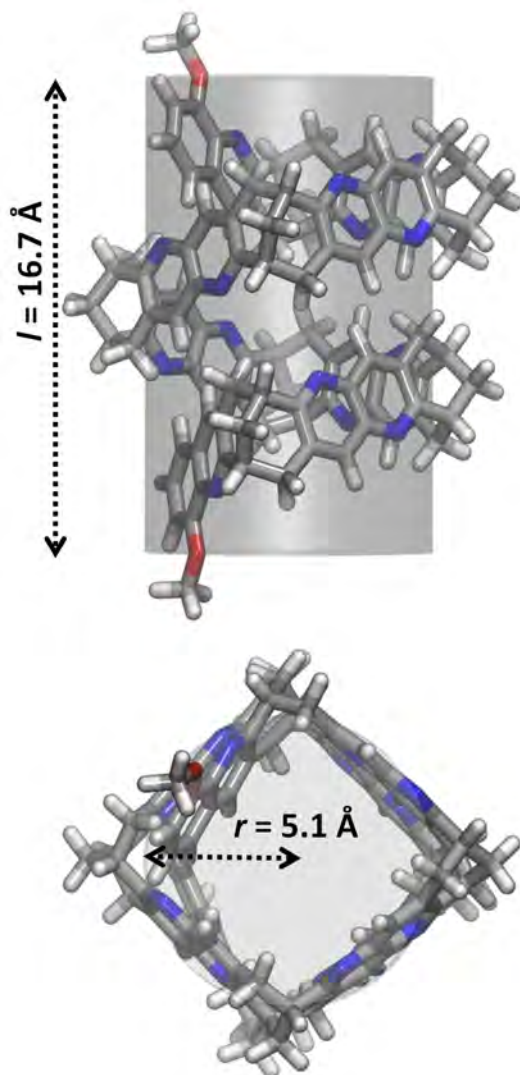

**Figure S9.** Heptamer 2 structure optimized at the B3LYP-D3/6-31G(d) level of theory. The structure deviated significantly from other models of the heptamer 2 (see Figure 4) and produced poor overlays with the crystal structure of **14**. For these reasons, the model was not considered further in the study.



## S5 Calculated Heptamer ECD/UV Spectra

### S5.1 ECD/UV Spectra for Different Heptamer Models at Different Levels of Theory

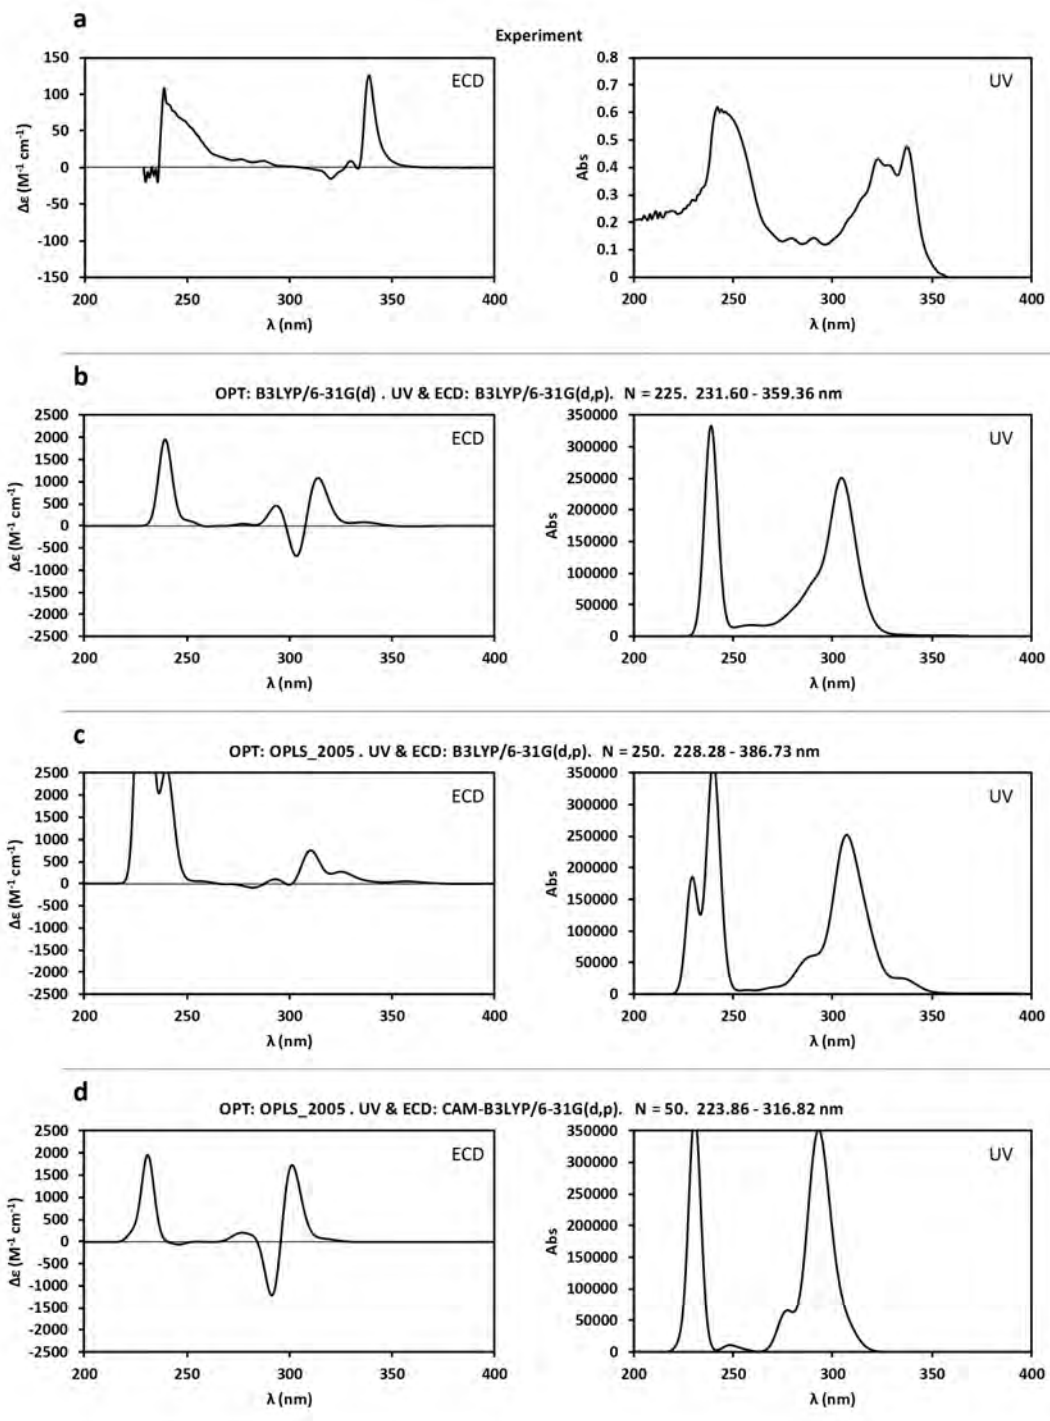

**Figure S10. Calculated (b - d) and experimental (a) ECD/UV spectra for the heptamer 2.** A bandwidth of 0.1 eV was used for calculated ECD curves. **a**, Experimental ECD and UV spectra. **b**, B3LYP/6-31G(d) geometry, B3LYP/6-31G(d,p) spectra. **c**, OPLS\_2005 geometry, B3LYP/6-31G(d,p) spectra. **d**, OPLS\_2005 geometry, CAM-B3LYP/6-31G(d,p) spectra.

## S5.2 Heptamer ECD Spectra at Different Bandwidths

Calculated ECD spectra are influenced considerably by the choice of bandwidth ( $\sigma$ ) as more spectral details are revealed at narrow bandwidths [13]. For the heptamer **2**, the spectra calculated at the B3LYP/6-31G(d,p) level for the B3LYP/6-31G(d) geometry (Figure S11 left panel, top), and at the CAM-B3LYP/6-31G(d,p) level for the OPLS\_2005 geometry (Figure S11 left panel, bottom) contain approximately the same level of detail at  $\sigma = 0.1$  eV. A bandwidth of  $\sigma = 0.2$  eV causes peak attenuation and broadening, as shown in Figure S11, right panel.

B3LYP/6-31G(d,p), 225 states, 0.1 eV

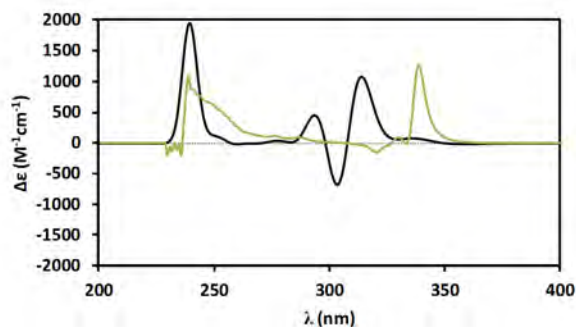

B3LYP/6-31G(d,p), 225 states, 0.2 eV

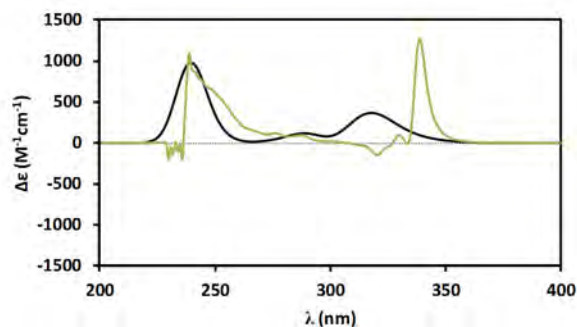

CAM-B3LYP/6-31G(d,p), 50 states, 0.1 eV

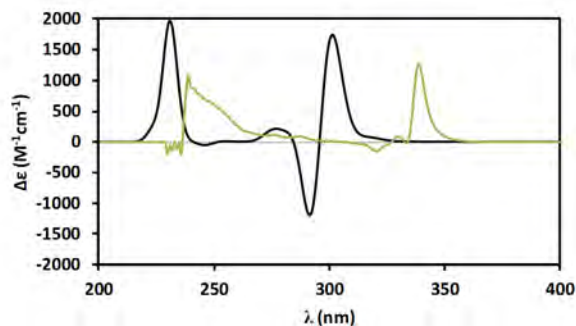

CAM-B3LYP/6-31G(d,p), 50 states, 0.2 eV

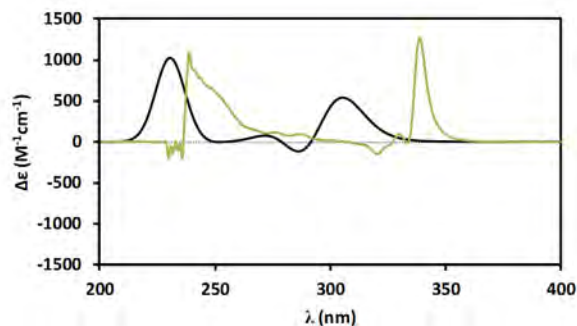

**Figure S11. Influence of bandwidth on calculated ECD spectra.** Simulated ECD spectra of heptamer **2** calculated at the B3LYP/6-31G(d,p) level (top panel) and the CAM-B3LYP/6-31G(d,p) level (bottom panel), using two different bandwidths (0.1 and 0.2 eV).

## S6 Coordinates for Optimized Structures

### *S6.1B3LYP/6-31G(d) Optimized Geometry of Heptamer 2*

|   |             |             |             |
|---|-------------|-------------|-------------|
| C | 3.27614600  | -5.29972400 | 2.65349100  |
| C | 3.39768400  | -4.85278500 | 1.17955500  |
| C | 4.78513500  | -4.35513400 | 0.81915400  |
| C | 5.91549300  | -4.65410100 | 1.64844900  |
| C | 5.74305000  | -5.40620300 | 2.96234600  |
| C | 5.71879600  | -4.42189500 | 4.15335500  |
| C | 4.44974400  | -6.23289500 | 2.98242400  |
| C | 5.00512700  | -3.62211800 | -0.32765600 |
| C | 6.31234900  | -3.19952500 | -0.66416600 |
| C | 7.36552200  | -3.56140800 | 0.22496400  |
| N | 7.14983600  | -4.27385600 | 1.36390400  |
| C | 7.76140900  | -2.10490300 | -2.08707800 |
| C | 8.89543700  | -2.42232100 | -1.26897100 |
| C | 8.67398300  | -3.14605900 | -0.11651100 |
| N | 6.52567400  | -2.47624500 | -1.79651700 |
| C | -7.50336600 | -3.53372600 | 0.28292500  |
| C | -6.47320400 | -3.06017000 | 1.14624400  |
| N | -7.26874200 | -4.42769300 | -0.71533100 |
| C | -6.03709600 | -4.87856500 | -0.88467900 |
| C | -4.92823200 | -4.47355300 | -0.07201000 |
| C | -5.16794500 | -3.56230000 | 0.93476600  |
| C | -5.84285000 | -5.84284800 | -2.04849000 |
| C | -5.76194000 | -5.07226800 | -3.38498900 |
| C | -3.38536700 | -5.72555300 | -1.67870100 |
| C | -3.54145600 | -5.04612300 | -0.29997300 |
| C | -4.56735800 | -6.68230500 | -1.88927400 |
| N | -6.70537500 | -2.15704000 | 2.13698700  |
| C | -7.93758200 | -1.70837300 | 2.30827900  |
| C | -9.04919900 | -2.12248400 | 1.50265500  |
| C | -8.80878800 | -3.03166700 | 0.49452800  |
| C | -3.05904900 | -2.70690700 | -4.70045700 |
| C | -1.98166000 | -3.12308500 | -3.86561300 |
| N | -2.92506500 | -1.72812700 | -5.63584500 |
| C | -1.74534700 | -1.14788000 | -5.78013400 |
| C | -0.59400300 | -1.49276700 | -4.99917900 |
| C | -0.73541900 | -2.47873700 | -4.04565800 |
| C | -1.67995700 | -0.03475800 | -6.81847800 |
| C | -2.25805800 | 1.28037700  | -6.24944400 |
| C | -1.32651900 | 1.97112400  | -5.27021300 |
| C | 0.06069100  | 1.61728400  | -5.19650600 |
| C | 0.62764600  | 0.49155800  | -6.05199900 |
| C | 0.74261400  | -0.81382500 | -5.23380300 |
| C | -0.24158900 | 0.22249400  | -7.28851500 |
| C | -1.77896600 | 2.97649700  | -4.44183300 |
| C | -0.88611700 | 3.63077300  | -3.56081400 |
| C | 0.47193300  | 3.19887600  | -3.56847900 |
| N | 0.91984300  | 2.20252900  | -4.37903100 |
| N | -1.33243500 | 4.62898400  | -2.75096900 |
| C | -0.46903200 | 5.22447600  | -1.94518900 |
| C | 0.91736100  | 4.86772000  | -1.87038500 |

|   |             |             |             |
|---|-------------|-------------|-------------|
| C | 1.36499900  | 3.85131800  | -2.68723300 |
| C | -1.04572200 | 6.31431300  | -1.04900600 |
| C | -1.77387400 | 5.69850300  | 0.16645000  |
| C | -0.82463100 | 5.15148000  | 1.21629900  |
| C | 0.56176400  | 5.51463400  | 1.22058600  |
| C | 1.13518800  | 6.42608700  | 0.14234900  |
| C | 1.86531500  | 5.60145500  | -0.94002000 |
| C | 0.04350200  | 7.26627800  | -0.53593800 |
| C | -1.27070000 | 4.30411000  | 2.20827500  |
| C | -0.37377700 | 3.81837000  | 3.18805500  |
| C | 0.98635600  | 4.23268300  | 3.09128900  |
| N | 1.42906100  | 5.07016900  | 2.11488400  |
| N | -0.81822500 | 2.98600000  | 4.16789800  |
| C | 0.04833300  | 2.54284100  | 5.06332600  |
| C | 1.44034100  | 2.88539800  | 5.05276100  |
| C | 1.88712300  | 3.73146200  | 4.05994600  |
| C | -0.51472500 | 1.58908200  | 6.11007400  |
| C | -0.67646000 | 0.17001100  | 5.52259200  |
| C | 0.64427300  | -0.55810400 | 5.35636000  |
| C | 1.82527800  | -0.11166900 | 6.03523600  |
| C | 1.80591500  | 1.14880300  | 6.89162200  |
| C | 2.38633300  | 2.34921300  | 6.11112500  |
| C | 0.38515800  | 1.50561700  | 7.35106300  |
| C | 0.74340300  | -1.68243800 | 4.56480300  |
| C | 1.97695900  | -2.36376200 | 4.44561500  |
| C | 3.08751300  | -1.83642900 | 5.16629100  |
| N | 2.99472200  | -0.72243400 | 5.94185300  |
| C | 3.23696900  | -4.09073900 | 3.57915000  |
| C | 4.41628900  | -3.65094600 | 4.26533700  |
| C | 4.32044200  | -2.52023800 | 5.04872200  |
| N | 2.07053300  | -3.47346500 | 3.66451500  |
| N | -2.11814600 | -4.09473100 | -2.92320700 |
| C | -3.29556200 | -4.68062600 | -2.78404900 |
| C | -4.44368500 | -4.34485900 | -3.57417700 |
| C | -4.30450100 | -3.35360700 | -4.52245100 |
| H | 9.48875500  | -3.41198500 | 0.55274100  |
| H | 2.31883400  | -5.81887300 | 2.76697700  |
| H | 3.14920700  | -5.71161800 | 0.53848400  |
| H | 2.65107600  | -4.07984100 | 0.96534100  |
| H | 6.62142400  | -6.04940300 | 3.07897700  |
| H | 6.56329500  | -3.72782500 | 4.07581700  |
| H | 5.87260600  | -4.99747300 | 5.07827600  |
| H | 4.31973800  | -6.69451100 | 3.96962600  |
| H | 4.49341300  | -7.04830900 | 2.24916000  |
| H | 4.19011600  | -3.35265400 | -0.99524500 |
| H | -4.36939100 | -3.20708200 | 1.58177700  |
| H | -6.73097700 | -6.48224200 | -2.08471900 |
| H | -5.89425000 | -5.79207900 | -4.20643200 |
| H | -6.59648100 | -4.36546300 | -3.45390900 |
| H | -2.43544800 | -6.27019000 | -1.67699200 |
| H | -2.78535100 | -4.26096300 | -0.18774700 |
| H | -3.33100000 | -5.79482700 | 0.47815700  |
| H | -4.64919900 | -7.36402900 | -1.03318600 |
| H | -4.41737700 | -7.30297700 | -2.78185600 |
| H | -9.60569300 | -3.37988500 | -0.15827500 |
| H | 5.17889400  | -2.12877600 | 5.58937900  |

|   |             |             |             |
|---|-------------|-------------|-------------|
| H | 0.09618700  | -2.78245300 | -3.41424200 |
| H | -2.31582100 | -0.34335000 | -7.65474100 |
| H | -2.45733100 | 1.96070100  | -7.09069800 |
| H | -3.22598500 | 1.08257100  | -5.77511100 |
| H | 1.63944300  | 0.79274000  | -6.34250000 |
| H | 1.23517600  | -0.60716100 | -4.27694800 |
| H | 1.40204700  | -1.50456300 | -5.77996500 |
| H | 0.15250300  | -0.64147600 | -7.83859000 |
| H | -0.22260000 | 1.07771300  | -7.97612100 |
| H | -2.82041400 | 3.28938200  | -4.44442200 |
| H | 2.40314300  | 3.52791200  | -2.67575900 |
| H | -1.78910800 | 6.85442800  | -1.64453700 |
| H | -2.40121400 | 6.47836000  | 0.62309500  |
| H | -2.45578200 | 4.91035300  | -0.17245900 |
| H | 1.87642800  | 7.06771300  | 0.63008700  |
| H | 2.55034700  | 4.89193000  | -0.46231400 |
| H | 2.48905300  | 6.28701000  | -1.53276500 |
| H | 0.47951500  | 7.84561800  | -1.35971100 |
| H | -0.39369000 | 7.98625700  | 0.16760300  |
| H | -2.30959100 | 3.98712000  | 2.26063100  |
| H | 2.93114600  | 4.02825200  | 3.99327900  |
| H | -1.51175400 | 1.95759600  | 6.37309800  |
| H | -1.32253300 | -0.41056000 | 6.19771900  |
| H | -1.20122200 | 0.22554800  | 4.56228200  |
| H | 2.45974500  | 0.96107800  | 7.74959100  |
| H | 3.34080200  | 2.06477000  | 5.65401800  |
| H | 2.61157100  | 3.15088600  | 6.83003500  |
| H | 0.39876400  | 2.46011900  | 7.89261200  |
| H | -0.00655300 | 0.74900700  | 8.04282400  |
| H | -0.11264500 | -2.06891500 | 4.01687700  |
| H | -5.13823900 | -3.04450000 | -5.14842700 |
| C | 7.91734600  | -1.26255500 | -3.34701600 |
| C | 7.53242700  | 0.20814300  | -3.06951000 |
| C | 8.58293500  | 0.95514100  | -2.26943700 |
| C | 9.91476700  | 0.45303200  | -2.14679400 |
| C | 10.30476000 | -0.89010000 | -2.75195300 |
| C | 10.29476700 | -1.99588500 | -1.67330400 |
| C | 9.35458000  | -1.30100900 | -3.88525900 |
| C | 8.29795200  | 2.15370400  | -1.65039200 |
| C | 9.29143000  | 2.86053800  | -0.93322100 |
| C | 10.58932400 | 2.26580300  | -0.88281800 |
| N | 10.86880400 | 1.08188900  | -1.48122200 |
| C | 10.06792900 | 4.72554600  | 0.38965600  |
| C | 11.36469800 | 4.15715900  | 0.45224500  |
| C | 11.63422400 | 2.95002400  | -0.16766600 |
| C | 9.04725100  | 4.10081700  | -0.28369800 |
| H | 9.89160300  | 5.67459100  | 0.88897700  |
| H | 12.14042900 | 4.68467700  | 0.99481200  |
| H | 7.21142400  | -1.65917200 | -4.08416900 |
| H | 7.39065700  | 0.71379300  | -4.03628800 |
| H | 6.56523700  | 0.24463400  | -2.55521500 |
| H | 11.33173100 | -0.78965300 | -3.11787200 |
| H | 10.85563900 | -1.65755400 | -0.79483900 |
| H | 10.83273100 | -2.87012100 | -2.06937700 |
| H | 9.61338200  | -2.30619500 | -4.24207000 |
| H | 9.44808500  | -0.62173200 | -4.74221600 |

|   |              |             |             |
|---|--------------|-------------|-------------|
| H | 7.29391100   | 2.57173500  | -1.70807500 |
| C | -10.53500100 | 2.47114300  | 0.24770000  |
| C | -9.21672700  | 3.02144100  | 0.25602400  |
| N | -10.88768300 | 1.42013400  | 1.02776800  |
| C | -9.98870300  | 0.88548600  | 1.83684300  |
| C | -8.64386800  | 1.35719300  | 1.93537900  |
| C | -8.28403000  | 2.41860600  | 1.13221100  |
| C | -10.45760600 | -0.32055100 | 2.64143000  |
| C | -10.44690900 | -1.59378500 | 1.76729400  |
| C | -8.11288500  | -0.66314600 | 3.40288500  |
| C | -7.65973700  | 0.72693100  | 2.90260600  |
| C | -9.57164800  | -0.56449400 | 3.87151300  |
| C | -8.89425000  | 4.11844800  | -0.58788500 |
| C | -9.85906900  | 4.64827900  | -1.40885100 |
| C | -11.17490100 | 4.12224900  | -1.43304300 |
| C | -11.52013800 | 3.05376400  | -0.62489000 |
| H | -7.26673100  | 2.80621600  | 1.16443600  |
| H | -11.49385300 | -0.12571100 | 2.93625500  |
| H | -11.03075800 | -2.37152400 | 2.28208400  |
| H | -10.96115300 | -1.39437400 | 0.82042500  |
| H | -7.45433500  | -0.95249100 | 4.22856400  |
| H | -6.66955500  | 0.64694300  | 2.43962500  |
| H | -7.54325000  | 1.38500600  | 3.77658300  |
| H | -9.67312000  | 0.25244000  | 4.59740500  |
| H | -9.88466400  | -1.48620700 | 4.37856200  |
| H | -9.62264200  | 5.48737100  | -2.05778400 |
| H | -11.90482800 | 4.57134100  | -2.09641100 |
| H | 8.05382300   | 4.53925600  | -0.32942900 |
| H | -7.88608500  | 4.52406200  | -0.57177900 |
| O | 12.84037000  | 2.32887500  | -0.16263700 |
| O | -12.75014600 | 2.48324600  | -0.57846400 |
| C | 13.91033200  | 2.95559500  | 0.52406700  |
| H | 14.77109100  | 2.29624300  | 0.39900700  |
| H | 14.14167800  | 3.94095000  | 0.09755300  |
| H | 13.69200400  | 3.06986300  | 1.59442300  |
| C | -13.76516400 | 3.01872700  | -1.41046100 |
| H | -14.65753200 | 2.42215800  | -1.21279200 |
| H | -13.97010400 | 4.07086400  | -1.17089200 |
| H | -13.50135600 | 2.93752700  | -2.47357400 |

## ***S6.2OPLS\_2005 Optimized Geometry of Heptamer 2***

|   |             |             |             |
|---|-------------|-------------|-------------|
| C | 3.79006300  | -3.50397400 | -5.19691500 |
| C | 3.94357600  | -1.98862700 | -4.94065300 |
| C | 5.36799200  | -1.56653000 | -4.58599200 |
| C | 6.46184800  | -2.44234800 | -4.77301300 |
| C | 6.26201500  | -3.86689500 | -5.29550300 |
| C | 6.23697800  | -4.89205600 | -4.14066200 |
| C | 4.94949100  | -3.97802500 | -6.08873800 |
| C | 5.62188600  | -0.27464500 | -4.08177900 |
| C | 6.94164700  | 0.11815500  | -3.77677600 |
| C | 7.97354600  | -0.84383400 | -4.00298900 |
| N | 7.73173100  | -2.08575400 | -4.48583800 |
| C | 8.45488100  | 1.71977400  | -3.01536800 |
| C | 9.54838100  | 0.84389200  | -3.20388800 |
| C | 9.29387600  | -0.44956200 | -3.70359400 |
| N | 7.18396600  | 1.36093400  | -3.29613200 |
| C | -7.97409000 | 0.80574800  | -4.01023900 |
| C | -6.94225600 | -0.15425000 | -3.77495600 |
| N | -7.73195700 | 2.04312600  | -4.50448000 |
| C | -6.46182300 | 2.39687800  | -4.79449800 |
| C | -5.36821800 | 1.52276200  | -4.59902200 |
| C | -5.62237800 | 0.23549000  | -4.08294600 |
| C | -6.26171700 | 3.81640900  | -5.33039600 |
| C | -6.23690500 | 4.85243200  | -4.18536200 |
| C | -3.78978900 | 3.45412100  | -5.22778400 |
| C | -3.94355600 | 1.94137900  | -4.95695300 |
| C | -4.94901400 | 3.91962700  | -6.12434100 |
| N | -7.18502500 | -1.39255800 | -3.28311100 |
| C | -8.45605900 | -1.74856600 | -2.99928200 |
| C | -9.54931800 | -0.87417300 | -3.19585900 |
| C | -9.29453800 | 0.41448600  | -3.70744200 |
| C | -3.58667900 | 5.66023600  | -1.52063900 |
| C | -2.47820300 | 4.98252100  | -2.11519700 |
| N | -3.49400700 | 6.34558400  | -0.35625600 |
| C | -2.30352200 | 6.40480600  | 0.27742600  |
| C | -1.14440200 | 5.77185800  | -0.22644400 |
| C | -1.24460700 | 5.05347900  | -1.43547100 |
| C | -2.27663800 | 7.18571900  | 1.59316300  |
| C | -2.79125600 | 6.32707400  | 2.76963800  |
| C | -1.76597300 | 5.32420200  | 3.29532700  |
| C | -0.40600600 | 5.39652300  | 2.91672900  |
| C | 0.09013800  | 6.45253200  | 1.92672700  |
| C | 0.19698000  | 5.87922800  | 0.49640600  |
| C | -0.85154100 | 7.66772600  | 1.91054100  |
| C | -2.15778600 | 4.31478000  | 4.19820500  |
| C | -1.20163500 | 3.41093600  | 4.70602900  |
| C | 0.14625100  | 3.57396400  | 4.26100400  |
| N | 0.52343500  | 4.53844600  | 3.38843900  |
| N | -1.57822500 | 2.44850300  | 5.58118500  |
| C | -0.64502700 | 1.60362200  | 6.06893200  |
| C | 0.71636800  | 1.68081300  | 5.69621200  |
| C | 1.10485500  | 2.67872000  | 4.77918800  |
| C | -1.14453000 | 0.53456700  | 7.04309600  |



|   |              |             |             |
|---|--------------|-------------|-------------|
| C | -1.75527400  | -0.67028200 | 6.29388400  |
| C | -0.71516000  | -1.62549000 | 5.71173500  |
| C | 0.64631400   | -1.54492800 | 6.08310700  |
| C | 1.14638800   | -0.46686300 | 7.04712300  |
| C | 1.75675900   | 0.73091000  | 6.28645100  |
| C | 0.00118700   | 0.03807500  | 7.94019900  |
| C | -1.10403200  | -2.63195600 | 4.80407900  |
| C | -0.14560900  | -3.53186900 | 4.29377400  |
| C | 1.20240200   | -3.36470200 | 4.73673900  |
| N | 1.57933300   | -2.39419400 | 5.60276500  |
| N | -0.52304300  | -4.50444300 | 3.43025800  |
| C | 0.40627100   | -5.36688400 | 2.96627800  |
| C | 1.76631700   | -5.29113600 | 3.34387300  |
| C | 2.15841500   | -4.27302500 | 4.23697400  |
| C | -0.09016400  | -6.43240100 | 1.98650300  |
| C | -0.19714100  | -5.87313000 | 0.55065800  |
| C | 1.14423500   | -5.77270400 | -0.17317500 |
| C | 2.30339400   | -6.40087900 | 0.33664400  |
| C | 2.27655300   | -7.16901100 | 1.65977600  |
| C | 2.79138700   | -6.29905400 | 2.82777300  |
| C | 0.85156400   | -7.64782400 | 1.98188900  |
| C | 1.24449500   | -5.06614100 | -1.38921900 |
| C | 2.47822800   | -5.00189300 | -2.06967700 |
| C | 3.58661000   | -5.67380400 | -1.46844900 |
| N | 3.49397100   | -6.34780100 | -0.29755900 |
| C | 3.75670700   | -4.29281600 | -3.88558500 |
| C | 4.91401700   | -4.92653200 | -3.37834000 |
| C | 4.81746300   | -5.61980600 | -2.15455900 |
| N | 2.57034000   | -4.33052000 | -3.24235500 |
| N | -2.57025600  | 4.29973900  | -3.28129200 |
| C | -3.75661400  | 4.25562300  | -3.92414500 |
| C | -4.91398400  | 4.89435100  | -3.42320200 |
| C | -4.81748600  | 5.59951500  | -2.20621300 |
| H | 10.10620800  | -1.14341000 | -3.86386000 |
| H | 2.84556900   | -3.67808100 | -5.71516500 |
| H | 3.66665500   | -1.44958000 | -5.84739100 |
| H | 3.24707800   | -1.66210200 | -4.16695500 |
| H | 7.09965400   | -4.10130500 | -5.95463900 |
| H | 7.06607200   | -4.71158700 | -3.45473700 |
| H | 6.39438900   | -5.88923500 | -4.55327800 |
| H | 4.78839500   | -5.00784100 | -6.40838600 |
| H | 4.99930900   | -3.37372400 | -6.99489500 |
| H | 4.81063600   | 0.42251200  | -3.93092900 |
| H | -4.81128900  | -0.46035600 | -3.92549900 |
| H | -7.09918400  | 4.04460900  | -5.99184500 |
| H | -6.39439000  | 5.84558900  | -4.60743700 |
| H | -7.06594600  | 4.67843000  | -3.49780300 |
| H | -2.84523600  | 3.62307600  | -5.74752200 |
| H | -3.24745300  | 1.62236300  | -4.17976900 |
| H | -3.66606700  | 1.39353100  | -5.85819400 |
| H | -4.99876100  | 3.30664700  | -7.02466300 |
| H | -4.78776000  | 4.94630300  | -6.45408500 |
| H | -10.10666700 | 1.10702600  | -3.87427300 |
| H | 5.68058500   | -6.11962900 | -1.73963400 |
| H | -0.37797600  | 4.56142000  | -1.85239300 |
| H | -2.93023700  | 8.05224000  | 1.47970700  |

|   |              |             |             |
|---|--------------|-------------|-------------|
| H | -3.04593400  | 6.98733400  | 3.59944900  |
| H | -3.71461000  | 5.81651500  | 2.49197500  |
| H | 1.08186700   | 6.77296100  | 2.25068300  |
| H | 0.69894500   | 4.91060600  | 0.51194800  |
| H | 0.82818500   | 6.53981800  | -0.09923500 |
| H | -0.51940400  | 8.39212300  | 1.16630900  |
| H | -0.83213600  | 8.17804000  | 2.87384800  |
| H | -3.18779900  | 4.23292900  | 4.51343300  |
| H | 2.13750800   | 2.77007900  | 4.47551500  |
| H | -1.91703200  | 0.98721100  | 7.66710200  |
| H | -2.36134700  | -1.24690600 | 6.99363100  |
| H | -2.43529100  | -0.32695600 | 5.51288600  |
| H | 1.91912000   | -0.91369400 | 7.67500400  |
| H | 2.43617700   | 0.38026600  | 5.50816700  |
| H | 2.36334100   | 1.31388900  | 6.98039000  |
| H | 0.35409500   | 0.84132500  | 8.58751100  |
| H | -0.35144700  | -0.75903400 | 8.59527300  |
| H | -2.13680000  | -2.72612700 | 4.50185900  |
| H | 3.18854300   | -4.18825300 | 4.55103800  |
| H | -1.08178500  | -6.74958100 | 2.31373900  |
| H | -0.82816100  | -6.53951300 | -0.03838600 |
| H | -0.69914700  | -4.90449600 | 0.55681700  |
| H | 2.93023600   | -8.03660300 | 1.55463500  |
| H | 3.71476800   | -5.79126600 | 2.54504300  |
| H | 3.04616200   | -6.95115400 | 3.66394300  |
| H | 0.83214300   | -8.14900200 | 2.95016100  |
| H | 0.51923800   | -8.37924700 | 1.24473800  |
| H | 0.37801300   | -4.57811300 | -1.81088800 |
| H | -5.68062500  | 6.10335300  | -1.79634700 |
| C | 8.65096100   | 3.13018200  | -2.45271000 |
| C | 8.34992000   | 3.18110800  | -0.93892100 |
| C | 9.46823500   | 2.60785500  | -0.07085600 |
| C | 10.75193500  | 2.35036200  | -0.60239900 |
| C | 11.06449000  | 2.59173800  | -2.08166400 |
| C | 10.97871600  | 1.28317000  | -2.89760800 |
| C | 10.09071300  | 3.61677200  | -2.68645900 |
| C | 9.23867800   | 2.34144900  | 1.29082300  |
| C | 10.29339100  | 1.82824600  | 2.06880700  |
| C | 11.55575800  | 1.59718900  | 1.45843900  |
| N | 11.76168200  | 1.86037400  | 0.14427700  |
| C | 11.13849800  | 1.04300000  | 4.20999500  |
| C | 12.39503400  | 0.80767500  | 3.62404800  |
| C | 12.61780700  | 1.08060700  | 2.24883900  |
| C | 10.08477100  | 1.55379000  | 3.43442200  |
| H | 10.98537500  | 0.82939800  | 5.26081800  |
| H | 13.17473500  | 0.41449000  | 4.25977600  |
| H | 7.95898900   | 3.79598200  | -2.97112400 |
| H | 8.21518800   | 4.22169900  | -0.64161200 |
| H | 7.40653700   | 2.67757600  | -0.72271200 |
| H | 12.08152300  | 2.98163000  | -2.14984000 |
| H | 11.52075200  | 0.48383300  | -2.39016000 |
| H | 11.48038000  | 1.43211600  | -3.85444000 |
| H | 10.28445900  | 3.73709300  | -3.75264500 |
| H | 10.23620400  | 4.59611400  | -2.23007100 |
| H | 8.26967400   | 2.52999000  | 1.73177700  |
| C | -11.55591800 | -1.58503800 | 1.47341800  |

|   |              |             |             |
|---|--------------|-------------|-------------|
| C | -10.29359500 | -1.81150600 | 2.08574200  |
| N | -11.76211900 | -1.85952000 | 0.16170300  |
| C | -10.75269500 | -2.35661900 | -0.58090300 |
| C | -9.46917500  | -2.61031300 | -0.04715300 |
| C | -9.23929800  | -2.33207300 | 1.31204400  |
| C | -11.06578600 | -2.61139400 | -2.05770800 |
| C | -10.97981900 | -1.31024300 | -2.88564700 |
| C | -8.65257500  | -3.15394900 | -2.42445100 |
| C | -8.35136600  | -3.19195800 | -0.91026700 |
| C | -10.09255200 | -3.64196600 | -2.65370000 |
| C | -10.08460400 | -1.52531000 | 3.44880100  |
| C | -11.13791400 | -1.00717800 | 4.22001100  |
| C | -12.39440500 | -0.77621300 | 3.63216600  |
| C | -12.61750900 | -1.06088500 | 2.25939900  |
| H | -8.27035800  | -2.51739800 | 1.75448400  |
| H | -12.08306500 | -3.00147200 | -2.12213300 |
| H | -11.48166600 | -1.46770500 | -3.84109700 |
| H | -11.52154400 | -0.50628500 | -2.38540600 |
| H | -7.96091700  | -3.82448000 | -2.93722600 |
| H | -7.40753600  | -2.68715600 | -0.69857800 |
| H | -8.21727200  | -4.22995600 | -0.60398100 |
| H | -10.23839600 | -4.61734200 | -2.18859600 |
| H | -10.28649700 | -3.77161000 | -3.71869400 |
| H | -10.98458500 | -0.78462500 | 5.26896900  |
| H | -13.17374300 | -0.37709000 | 4.26462400  |
| H | 9.12014500   | 1.73316900  | 3.89052000  |
| H | -9.11999900  | -1.70124000 | 3.90629700  |
| O | 13.83666900  | 0.86616000  | 1.62799500  |
| O | -13.83620500 | -0.85085200 | 1.63685100  |
| C | 14.91543200  | 0.35366300  | 2.40067400  |
| H | 15.79505800  | 0.24702500  | 1.76563500  |
| H | 15.18159600  | 1.02794900  | 3.21579800  |
| H | 14.68543400  | -0.63224200 | 2.80723000  |
| C | -14.91448700 | -0.33041300 | 2.40495100  |
| H | -15.79381600 | -0.22827000 | 1.76899700  |
| H | -15.18146500 | -0.99747600 | 3.22591100  |
| H | -14.68322400 | 0.65861200  | 2.80318900  |

### ***S6.3B3LYP-D3/6-31G(d,p) Optimized Geometry of Heptamer 2***

|   |          |          |          |
|---|----------|----------|----------|
| C | 3.45600  | 6.11680  | -0.10330 |
| C | 3.06320  | 5.29290  | 1.13870  |
| C | 4.05030  | 4.17700  | 1.40140  |
| C | 5.38120  | 4.24140  | 0.87720  |
| C | 5.83810  | 5.42300  | 0.02300  |
| C | 5.88620  | 4.98840  | -1.45620 |
| C | 4.88780  | 6.62520  | 0.11840  |
| C | 3.66740  | 3.04680  | 2.09220  |
| C | 4.57490  | 1.97070  | 2.22910  |
| C | 5.87180  | 2.12830  | 1.65340  |
| N | 6.25810  | 3.26060  | 1.00550  |
| C | 5.02160  | -0.20630 | 2.85540  |
| C | 6.34180  | -0.15650 | 2.30020  |
| C | 6.75140  | 1.02320  | 1.71890  |
| N | 4.17970  | 0.81460  | 2.83050  |
| C | -4.50820 | 4.01960  | -0.31570 |
| C | -3.44770 | 3.44180  | -1.07350 |
| N | -4.28480 | 4.86330  | 0.72840  |
| C | -3.03480 | 5.12570  | 1.07220  |
| C | -1.89960 | 4.54530  | 0.41850  |
| C | -2.12880 | 3.71120  | -0.65160 |
| C | -2.85810 | 6.00930  | 2.30260  |
| C | -3.21420 | 5.20020  | 3.56630  |
| C | -0.47090 | 5.30630  | 2.36160  |
| C | -0.49070 | 4.80280  | 0.90380  |
| C | -1.41590 | 6.51260  | 2.45590  |
| N | -3.66380 | 2.61020  | -2.12570 |
| C | -4.90760 | 2.27110  | -2.41750 |
| C | -6.04250 | 2.71990  | -1.66530 |
| C | -5.82480 | 3.61890  | -0.64260 |
| C | -1.60280 | 1.95670  | 4.77750  |
| C | -0.31060 | 2.11730  | 4.19190  |
| N | -1.96340 | 0.84980  | 5.48020  |
| C | -1.07650 | -0.11960 | 5.62240  |
| C | 0.24420  | -0.06200 | 5.07360  |
| C | 0.61530  | 1.06140  | 4.36360  |
| C | -1.57170 | -1.35950 | 6.35950  |
| C | -2.47230 | -2.20710 | 5.43410  |
| C | -1.68690 | -2.92860 | 4.35570  |
| C | -0.26490 | -3.07620 | 4.45510  |
| C | 0.50310  | -2.52450 | 5.64930  |
| C | 1.21010  | -1.21260 | 5.25570  |
| C | -0.41440 | -2.24210 | 6.84580  |
| C | -2.31760 | -3.46240 | 3.25140  |
| C | -1.56130 | -4.10620 | 2.24340  |
| C | -0.14420 | -4.13130 | 2.40710  |

|   |          |          |          |
|---|----------|----------|----------|
| N | 0.47380  | -3.63790 | 3.51300  |
| N | -2.18080 | -4.66120 | 1.16530  |
| C | -1.43830 | -5.20560 | 0.21470  |
| C | -0.00490 | -5.18780 | 0.23540  |
| C | 0.62150  | -4.67020 | 1.34850  |
| C | -2.20080 | -5.84480 | -0.94490 |
| C | -2.84280 | -4.76960 | -1.84090 |
| C | -1.79820 | -3.98610 | -2.60850 |
| C | -0.46460 | -4.48700 | -2.76530 |
| C | -0.06130 | -5.85110 | -2.20710 |
| C | 0.80090  | -5.70540 | -0.93780 |
| C | -1.28530 | -6.70020 | -1.83370 |
| C | -2.10330 | -2.76580 | -3.17050 |
| C | -1.11130 | -2.01690 | -3.84370 |
| C | 0.19420  | -2.58660 | -3.90810 |
| N | 0.48880  | -3.80750 | -3.38160 |
| N | -1.41750 | -0.81110 | -4.39730 |
| C | -0.46500 | -0.14070 | -5.02510 |
| C | 0.88300  | -0.62000 | -5.13890 |
| C | 1.19370  | -1.83600 | -4.56860 |
| C | -0.88220 | 1.18610  | -5.65360 |
| C | -0.93070 | 2.34780  | -4.63220 |
| C | 0.44430  | 2.86940  | -4.25590 |
| C | 1.60930  | 2.47470  | -4.98860 |
| C | 1.49970  | 1.59910  | -6.22890 |
| C | 1.93160  | 0.15490  | -5.91150 |
| C | 0.07160  | 1.58110  | -6.79000 |
| C | 0.61880  | 3.74720  | -3.20440 |
| C | 1.91850  | 4.14770  | -2.81390 |
| C | 3.01190  | 3.61310  | -3.55730 |
| N | 2.83910  | 2.81800  | -4.64560 |
| C | 3.33100  | 5.25000  | -1.35550 |
| C | 4.49720  | 4.71730  | -2.00020 |
| C | 4.31590  | 3.92010  | -3.10800 |
| N | 2.09620  | 4.97300  | -1.74360 |
| N | 0.02660  | 3.21730  | 3.46210  |
| C | -0.88050 | 4.16490  | 3.28620  |
| C | -2.20560 | 4.09960  | 3.83050  |
| C | -2.54320 | 2.99180  | 4.57480  |
| H | 7.73510  | 1.12070  | 1.26620  |
| H | 2.75220  | 6.95040  | -0.20430 |
| H | 3.00700  | 5.96500  | 2.00750  |
| H | 2.07170  | 4.86330  | 1.00030  |
| H | 6.85170  | 5.69320  | 0.33800  |
| H | 6.50500  | 4.09080  | -1.55780 |
| H | 6.37030  | 5.78210  | -2.04380 |
| H | 5.16840  | 7.37470  | -0.63190 |
| H | 4.95400  | 7.11040  | 1.09990  |
| H | 2.66000  | 2.95330  | 2.49490  |
| H | -1.31040 | 3.20940  | -1.15780 |
| H | -3.56090 | 6.84500  | 2.21790  |

|   |          |          |          |
|---|----------|----------|----------|
| H | -3.24860 | 5.88520  | 4.42620  |
| H | -4.21540 | 4.76970  | 3.45920  |
| H | 0.55330  | 5.59220  | 2.61960  |
| H | 0.09450  | 3.88090  | 0.81950  |
| H | -0.00050 | 5.53660  | 0.24950  |
| H | -1.16210 | 7.23580  | 1.67110  |
| H | -1.30790 | 7.02800  | 3.41840  |
| H | -6.64490 | 3.99830  | -0.03800 |
| H | 5.15960  | 3.48580  | -3.63850 |
| H | 1.60490  | 1.13590  | 3.91480  |
| H | -2.18280 | -1.01390 | 7.19970  |
| H | -3.00660 | -2.94620 | 6.04870  |
| H | -3.23480 | -1.56780 | 4.97550  |
| H | 1.27130  | -3.26120 | 5.90790  |
| H | 1.77150  | -1.36220 | 4.33180  |
| H | 1.94150  | -0.95780 | 6.03640  |
| H | 0.15750  | -1.74250 | 7.63750  |
| H | -0.81120 | -3.17320 | 7.26950  |
| H | -3.39460 | -3.38100 | 3.12500  |
| H | 1.70590  | -4.64720 | 1.42260  |
| H | -3.00300 | -6.45040 | -0.50950 |
| H | -3.52790 | -5.26360 | -2.54480 |
| H | -3.45510 | -4.09380 | -1.23770 |
| H | 0.54370  | -6.34680 | -2.97370 |
| H | 1.65270  | -5.04620 | -1.12570 |
| H | 1.22370  | -6.68990 | -0.69120 |
| H | -0.95660 | -7.60770 | -1.31280 |
| H | -1.83740 | -7.02130 | -2.72550 |
| H | -3.10600 | -2.36110 | -3.10280 |
| H | 2.20140  | -2.24150 | -4.62170 |
| H | -1.89990 | 1.04010  | -6.03080 |
| H | -1.51190 | 3.16580  | -5.08200 |
| H | -1.48820 | 2.04880  | -3.73710 |
| H | 2.20190  | 2.00530  | -6.96480 |
| H | 2.87840  | 0.16660  | -5.36020 |
| H | 2.12560  | -0.36860 | -6.85900 |
| H | 0.00930  | 0.87040  | -7.62380 |
| H | -0.20810 | 2.56730  | -7.18080 |
| H | -0.22870 | 4.13210  | -2.64680 |
| H | -3.53790 | 2.87340  | 4.99720  |
| C | 4.46450  | -1.50260 | 3.42480  |
| C | 3.51500  | -2.14770 | 2.39130  |
| C | 4.26660  | -2.71790 | 1.20510  |
| C | 5.66340  | -3.01400 | 1.28720  |
| C | 6.46450  | -2.68560 | 2.54180  |
| C | 7.24850  | -1.37180 | 2.33410  |
| C | 5.56330  | -2.51550 | 3.77120  |
| C | 3.63600  | -2.96440 | 0.00330  |
| C | 4.34630  | -3.50510 | -1.09540 |
| C | 5.73510  | -3.77260 | -0.89270 |
| N | 6.36060  | -3.51580 | 0.28260  |

|   |           |          |          |
|---|-----------|----------|----------|
| C | 4.49650   | -4.31450 | -3.36400 |
| C | 5.87640   | -4.58690 | -3.19070 |
| C | 6.49680   | -4.32420 | -1.98160 |
| C | 3.73900   | -3.77980 | -2.35040 |
| H | 4.03200   | -4.54030 | -4.32070 |
| H | 6.43580   | -5.00480 | -4.01940 |
| H | 3.88560   | -1.24550 | 4.31580  |
| H | 2.93630   | -2.93980 | 2.88630  |
| H | 2.78480   | -1.40570 | 2.04830  |
| H | 7.18820   | -3.49360 | 2.69010  |
| H | 7.82670   | -1.43280 | 1.40570  |
| H | 7.97340   | -1.26320 | 3.15450  |
| H | 6.16190   | -2.17240 | 4.62470  |
| H | 5.10300   | -3.46870 | 4.05950  |
| H | 2.57820   | -2.73460 | -0.11490 |
| C | -7.18930  | -1.66870 | -0.05510 |
| C | -5.83780  | -2.13250 | -0.05100 |
| N | -7.63780  | -0.73770 | -0.93500 |
| C | -6.80850  | -0.26050 | -1.84720 |
| C | -5.44120  | -0.66780 | -1.95170 |
| C | -4.97700  | -1.57770 | -1.02650 |
| C | -7.37110  | 0.84490  | -2.73920 |
| C | -7.42800  | 2.17460  | -1.95460 |
| C | -5.05370  | 1.25360  | -3.53990 |
| C | -4.54070  | -0.10540 | -3.03070 |
| C | -6.51060  | 1.07780  | -3.98990 |
| C | -5.41050  | -3.10720 | 0.89170  |
| C | -6.31310  | -3.59700 | 1.80470  |
| C | -7.65690  | -3.14640 | 1.83130  |
| C | -8.10050  | -2.20110 | 0.92260  |
| H | -3.92960  | -1.87050 | -1.02860 |
| H | -8.39430  | 0.56420  | -3.00900 |
| H | -8.00340  | 2.90540  | -2.54150 |
| H | -7.96960  | 2.02280  | -1.01460 |
| H | -4.41580  | 1.57160  | -4.37210 |
| H | -3.51460  | -0.00130 | -2.66840 |
| H | -4.49550  | -0.79630 | -3.88400 |
| H | -6.57910  | 0.23070  | -4.68360 |
| H | -6.87240  | 1.96440  | -4.52580 |
| H | -6.00140  | -4.35220 | 2.52210  |
| H | -8.33180  | -3.55910 | 2.57200  |
| H | 2.68220   | -3.58510 | -2.50140 |
| H | -4.38710  | -3.47270 | 0.87110  |
| O | 7.80970   | -4.54820 | -1.71780 |
| O | -9.36580  | -1.71300 | 0.86510  |
| C | 8.61570   | -5.08350 | -2.75340 |
| H | 9.61870   | -5.17680 | -2.33260 |
| H | 8.26160   | -6.07400 | -3.07200 |
| H | 8.64830   | -4.41730 | -3.62690 |
| C | -10.31250 | -2.20030 | 1.80100  |
| H | -11.24600 | -1.68000 | 1.57890  |

|   |           |          |         |
|---|-----------|----------|---------|
| H | -10.46600 | -3.28340 | 1.69550 |
| H | -10.01090 | -1.98060 | 2.83480 |



## S7 Crystallographic details of compound 14

The crystals show a curious habit where individual crystallites with tetragonal shape form hexagonal, snow-flake like aggregates. A single tetragonal crystal was chosen for the x-ray diffraction experiment. The crystal diffracts well, but due to the small size, quite weakly. The diffraction pattern can be indexed in a tetragonal unit cell,  $a=13.4835$   $b=23.3611$  Å and the systematic absences are consistent with the symmetry  $P4_12_12$ . Given the relative sizes of the molecule (ca. 60 non-hydrogen atoms) and the volume of the unit cell ca.  $4250\text{Å}^3$ ,  $Z$  is expected to be 4, and therefore a sub group of  $P4_12_12$  is expected. Further, the molecule exhibits a pronounced pseudo symmetry, the violation of which would be consistent with lowering the symmetry from  $P4_12_12$  to one of the two maximal subgroups that split the orbit of the 2-fold axes along  $[110]$ ,  $P4_1$  or  $P2_12_12_1$ . The crystal structure was solved using direct methods (Shelxs-97, REF) and a solution featuring fragments of the expected molecule sitting on the diagonal 2-fold axis was chosen as a starting point for refinements. The structure was refined using JANA2006, and positions of non-hydrogen atoms were added with the help of direct inspection of electron density maps. The asymmetric methoxy group was clearly visible in the electron density, but had to be modelled as half occupied. The structure was completed by adding hydrogen positions constrained in a riding model, and because of numerical instabilities, all inter-atomic distances were constrained to standard values. In the final stage of the refinement, some solvent positions were identified. These were best understood in terms of an ethanol molecule encased in the fold of the molecule sandwiched between two water molecules. The agreement factors for observed reflections remained above 10%. Anisotropic thermal displacement parameters could not be refined.

In the next step, the symmetry of the model was reduced to either of the two maximal subgroups  $P2_12_12_1$  and  $P4_1$ . Symmetry reduction was seeded by removing one of the half occupied methoxy groups. Both models contain a single, independent molecule in the unit cell and the fit is improved to  $R_1=8\%$  in two more or less indistinguishable fits between model and data. Thermal parameters were constrained so that sites related by the pseudo 2-fold symmetry were kept equal. For both models twinning according to the original super group symmetry is important. This result is unsurprising given that the expected intramolecular interaction is very weak, and the crystallization basically represents a packing of objects with pseudo 2-fold symmetry. Indeed, it may even be assumed that the sample in question constitutes an intergrowth between the two structural models. To investigate this, a new compound model was constructed using the solutions from  $P2_12_12_1$  and  $P4_1$  and the same interatomic distances as for the individual models and thermal parameters were constrained to be equal for corresponding sites in the two models. This compound model refined to an  $R_1$  of 6.11 for 2405 observed reflections (a total of 14987 independent reflections were measured) and 426 parameters. All data pertaining to the refinement of the individual structures are given in the respective cif files, as there is no agreed format for cif files for multiple structures from one data set.

## S8 REFERENCES

- [1] Schrödinger Release 2013-3: Maestro, version 9.6, Schrödinger, LLC, New York, NY, 2013.
- [2] MacroModel, Schrödinger Release 2013-3: MacroModel, version 10.2, Schrödinger, LLC, New York, NY, 2013.
- [3] J. L. Banks, H. S. Beard, Y. Cao, A. E. Cho, W. Damm, R. Farid, A. K. Felts, T. A. Halgren, D. T. Mainz, J. R. Maple, R. Murphy, D. M. Philipp, M. P. Repasky, L. Y. Zhang, B. J. Berne, R. A. Friesner, E. Gallicchio, and R. M. Levy, “Integrated Modeling Program, Applied Chemical Theory (IMPACT),” *J. Comput. Chem.*, vol. 26, no. 16, pp. 1752–1780, 2005.
- [4] Schrödinger Release 2014-1: Jaguar, version 8.3, Schrödinger, LLC, New York, NY, 2014.
- [5] Gaussian 09, Revision D.01, M. J. Frisch, G. W. Trucks, H. B. Schlegel, G. E. Scuseria, M. A. Robb, J. R. Cheeseman, G. Scalmani, V. Barone, B. Mennucci, G. A. Petersson, H. Nakatsuji, M. Caricato, X. Li, H. P. Hratchian, A. F. Izmaylov, J. Bloino, G. Zheng, J. L. Sonnenberg, M. Hada, M. Ehara, K. Toyota, R. Fukuda, J. Hasegawa, M. Ishida, T. Nakajima, Y. Honda, O. Kitao, H. Nakai, T. Vreven, J. A. Montgomery, Jr., J. E. Peralta, F. Ogliaro, M. Bearpark, J. J. Heyd, E. Brothers, K. N. Kudin, V. N. Staroverov, R. Kobayashi, J. Normand, K. Raghavachari, A. Rendell, J. C. Burant, S. S. Iyengar, J. Tomasi, M. Cossi, N. Rega, J. M. Millam, M. Klene, J. E. Knox, J. B. Cross, V. Bakken, C. Adamo, J. Jaramillo, R. Gomperts, R. E. Stratmann, O. Yazyev, A. J. Austin, R. Cammi, C. Pomelli, J. W. Ochterski, R. L. Martin, K. Morokuma, V. G. Zakrzewski, G. A. Voth, P. Salvador, J. J. Dannenberg, S. Dapprich, A. D. Daniels, Ö. Farkas, J. B. Foresman, J. V. Ortiz, J. Cioslowski, and D. J. Fox, Gaussian, Inc., Wallingford CT, 2009.
- [6] J. P. Perdew, “Density-functional approximation for the correlation energy of the inhomogeneous electron gas,” *Phys. Rev. B*, vol. 33, no. 12, pp. 8822–8824, Jun. 1986.
- [7] A. D. Becke, “Density-functional exchange-energy approximation with correct asymptotic behavior,” *Phys. Rev. A*, vol. 38, no. 6, pp. 3098–3100, Sep. 1988.
- [8] A. D. Becke, “Density functional thermochemistry. III. The role of exact exchange,” *J. Chem. Phys.*, vol. 98, no. 7, pp. 5648–5652, 1993.
- [9] C. Lee, W. Yang, and R. G. Parr, “Development of the Colle-Salvetti correlation-energy formula into a functional of the electron density,” *Phys. Rev. B*, vol. 37, no. 2, pp. 785–789, Jan. 1988.
- [10] S. H. Vosko, L. Wilk, and M. Nusair, “Accurate spin-dependent electron liquid correlation energies for local spin density calculations: a critical analysis,” *Can. J. Phys.*, vol. 58, no. 8, pp. 1200–1211, Aug. 1980.
- [11] P. J. Stephens, F. J. Devlin, C. F. Chabalowski, and M. J. Frisch, “Ab Initio Calculation of Vibrational Absorption and Circular Dichroism Spectra Using Density Functional Force Fields,” *J. Phys. Chem.*, vol. 98, no. 45, pp. 11623–11627, Nov. 1994.
- [12] T. Yanai, D. P. Tew, and N. C. Handy, “A new hybrid exchange–correlation functional using the Coulomb-attenuating method (CAM-B3LYP),” *Chem. Phys. Lett.*, vol. 393, no. 1–3, pp. 51–57, Jul. 2004.
- [13] P. J. Stephens and N. Harada, “ECD cotton effect approximated by the Gaussian curve and other methods,” *Chirality*, vol. 22, no. 2, pp. 229–233, 2010.
